# Supplementary material
Source: publisher site journal article supplement (https://www.spandidos-publications.com/1107/downloadSupplementary)
Supplement: Supplementary file 1 [file downloadSupplementary]

## Sheet: shFLNB_vs_shCtrl_Sig_DEG
Table SIV: shFLNB compared with Ctrl DEGs.
Gene	logFC	logCPM	PValue	FDR	shCtrl_1st	shCtrl_2nd	shFLNB_1st	shFLNB_2nd	DEG	Symbol	Chr	GeneType	Description
ENSG00000184988.8	5.76528	-2.01831	0.000362063	0.0137665	0	0	0.08	0.09	Up	TMEM106A	chr17	protein_coding	transmembrane protein 106A
ENSG00000264007.1	5.55475	-2.15126	0.00109423	0.0289386	0	0	0.06	0.69	Up	RP11-68I3.10	chr17	sense_intronic
ENSG00000267283.1	1.63985	-0.0174968	0.00166837	0.0394346	0	1.17	2.53	1.33	Up	AC005306.3	chr19	processed_transcript
ENSG00000279649.1	5.8621	-1.95523	0.000211004	0.00971433	0	0	0.15	0.07	Up	RP11-96D1.8	chr16	TEC
ENSG00000132141.13	2.58949	-1.08646	0.000591179	0.0205161	0.07	0.02	0.52	0.12	Up	CCT6B	chr17	protein_coding	chaperonin containing TCP1, subunit 6B (zeta 2)
ENSG00000267213.4	4.39798	-1.17775	1.59161e-05	0.00165506	0	0.05	0.12	1.13	Up	AC007773.2	chr19	antisense
ENSG00000275894.1	2.83003	-1.22906	0.00063657	0.0206707	0	0.19	0.86	0.67	Up	RP3-453C12.14	chr20	sense_intronic
ENSG00000204176.13	1.6135	-0.0332344	0.00199803	0.0420487	0.07	0.05	0.23	0.15	Up	SYT15	chr10	protein_coding	synaptotagmin XV
ENSG00000165240.17	1.18855	4.75685	0.000824386	0.0251565	1.47	2.04	4.51	3.89	Up	ATP7A	chrX	protein_coding	ATPase, Cu++ transporting, alpha polypeptide
ENSG00000100626.16	3.47901	-1.83503	0.00093262	0.0276786	0	0.01	0.1	0.01	Up	GALNT16	chr14	protein_coding	polypeptide N-acetylgalactosaminyltransferase 16
ENSG00000278665.1	4.07364	-1.42281	3.59209e-05	0.0030755	0.06	0	0.72	0.59	Up	RP11-666O2.4	chr16	unprocessed_pseudogene
ENSG00000244252.1	6.70993	-1.3456	9.1478e-07	0.00021558	0	0	1.31	0.66	Up	RP11-495P10.7	chr1	lincRNA
ENSG00000223813.2	2.07542	-0.502456	0.000698614	0.0219372	0.22	0.06	0.26	1.01	Up	AC007255.8	chr7	antisense
ENSG00000259939.1	6.02764	-1.84334	0.000123998	0.00687972	0	0	1.02	0.62	Up	RP11-77H9.5	chr16	antisense
ENSG00000145416.13	6.10949	-1.78726	7.34591e-05	0.0048704	0	0	0.08	0.02	Up	2019-03-01	chr4	protein_coding	membrane-associated ring finger (C3HC4) 1, E3 ubiquitin protein ligase
ENSG00000168813.16	1.10561	4.2313	0.0019584	0.0413977	0.75	2.05	3.82	2.48	Up	ZNF507	chr19	protein_coding	zinc finger protein 507
ENSG00000274667.1	3.37752	-1.26101	0.000141196	0.00763776	0	0.13	1.4	0.21	Up	RP11-31H5.3	chr15	sense_intronic
ENSG00000026103.19	1.17021	3.35145	0.00138584	0.0351287	1.92	2.26	5.52	4.35	Up	FAS	chr10	protein_coding	Fas cell surface death receptor
ENSG00000183044.11	3.54272	-1.79157	0.00093262	0.0276786	0.01	0	0.03	0.08	Up	ABAT	chr16	protein_coding	4-aminobutyrate aminotransferase
ENSG00000166225.8	1.47128	4.30244	4.49658e-05	0.00346368	1.27	1.5	4.91	3.15	Up	FRS2	chr12	protein_coding	fibroblast growth factor receptor substrate 2
ENSG00000257283.1	6.24188	-1.69255	2.63878e-05	0.00237012	0	0	0.63	0.81	Up	RP11-1060G2.1	chr12	antisense
ENSG00000272630.1	3.56254	0.160538	3.98004e-09	3.10521e-06	0.05	0.05	0.54	0.62	Up	RP11-344N10.5	chr10	lincRNA
ENSG00000240758.2	1.64332	0.131877	0.00108403	0.0289386	0.55	0.76	1.61	2.7	Up	RP11-155G14.6	chr7	processed_transcript
ENSG00000170153.10	1.33313	1.9139	0.000733026	0.0229572	0.22	0.14	0.37	0.57	Up	RNF150	chr4	protein_coding	ring finger protein 150
ENSG00000182742.5	5.6684	-2.08059	0.000626635	0.0205161	0	0	0.07	0.07	Up	HOXB4	chr17	protein_coding	homeobox B4
ENSG00000173175.14	5.94428	-1.89987	0.000211004	0.00971433	0	0	0.04	0.04	Up	ADCY5	chr3	protein_coding	adenylate cyclase 5
ENSG00000248275.1	2.07965	-0.804343	0.00104775	0.0289386	0	0.31	0.44	0.95	Up	TRIM52-AS1	chr5	processed_transcript	TRIM52 antisense RNA 1 (head to head)
ENSG00000179397.17	6.02324	-1.8459	0.000123998	0.00687972	0	0	0.09	0.11	Up	C1orf101	chr1	protein_coding	chromosome 1 open reading frame 101
ENSG00000274340.1	5.46063	-2.20966	0.00192837	0.0409813	0	0	0.29	0	Up	RP11-435J9.2	chr15	lincRNA
ENSG00000181126.13	7.67315	-0.559561	4.62627e-11	9.17621e-08	0	0	0.19	0.18	Up	HLA-V	chr6	transcribed_unprocessed_pseudogene	major histocompatibility complex, class I, V (pseudogene)
ENSG00000184730.10	5.76217	-2.02008	0.000362063	0.0137665	0	0	0.05	0.1	Up	APOBR	chr16	protein_coding	apolipoprotein B receptor
ENSG00000161048.11	1.30614	1.89169	0.000976817	0.0287394	0.2	0.48	1.03	0.73	Up	NAPEPLD	chr7	protein_coding	N-acyl phosphatidylethanolamine phospholipase D
ENSG00000229127.1	6.02764	-1.84334	0.000123998	0.00687972	0	0	0.19	0.12	Up	AC007038.7	chr2	antisense
ENSG00000273373.1	2.14806	2.24947	7.38243e-08	3.19485e-05	0.79	0.29	3.77	1.29	Up	RP5-1074L1.4	chr1	antisense
ENSG00000184949.15	2.07845	2.01926	2.85655e-07	9.31393e-05	0.19	0.07	0.73	0.44	Up	FAM227A	chr22	protein_coding	family with sequence similarity 227, member A
ENSG00000227953.6	6.8122	-1.26738	3.70609e-07	0.000110265	0	0	0.37	0.07	Up	LINC01341	chr1	processed_transcript	long intergenic non-protein coding RNA 1341
ENSG00000259645.1	5.55314	-2.15216	0.00109423	0.0289386	0	0	0	0.68	Up	RP11-253M7.6	chr15	sense_intronic
ENSG00000273167.1	1.15276	2.38308	0.00237057	0.0483498	0.46	0.93	1.76	1.48	Up	RP11-307N16.6	chr13	protein_coding
ENSG00000186715.10	2.52424	-1.13113	0.000830003	0.0251665	0.01	0.03	0.06	0.17	Up	MST1L	chr1	transcribed_unprocessed_pseudogene	macrophage stimulating 1-like
ENSG00000263142.5	4.61329	-1.01198	2.29353e-06	0.000447638	0	0.01	0.13	0.15	Up	LRRC37A17P	chr17	transcribed_unprocessed_pseudogene	leucine rich repeat containing 37, member A17, pseudogene
ENSG00000241255.1	6.03647	-1.83822	7.34591e-05	0.0048704	0	0	1.61	0.09	Up	RP1-89D4.1	chr11	processed_pseudogene
ENSG00000178502.5	1.20596	1.70335	0.00249382	0.0499225	1.01	0.44	1.53	1.99	Up	KLHL11	chr17	protein_coding	kelch-like family member 11
ENSG00000203880.11	1.14082	3.96967	0.00149787	0.0371254	2.39	1.97	5.04	5.06	Up	PCMTD2	chr20	protein_coding	protein-L-isoaspartate (D-aspartate) O-methyltransferase domain containing 2
ENSG00000138735.15	2.5313	0.575595	3.37902e-07	0.000108686	0	0.09	0.37	0.21	Up	PDE5A	chr4	protein_coding	phosphodiesterase 5A, cGMP-specific
ENSG00000159197.3	5.44409	-2.21887	0.00192837	0.0409813	0	0	0.07	0.35	Up	KCNE2	chr21	protein_coding	potassium channel, voltage gated subfamily E regulatory beta subunit 2
ENSG00000259556.2	5.56608	-2.14491	0.00109423	0.0289386	0	0	0.29	0.18	Up	RP11-56B16.2	chr15	unprocessed_pseudogene
ENSG00000180346.3	1.22399	2.57141	0.00115446	0.0301714	0.99	0.99	2.53	2.33	Up	TIGD2	chr4	protein_coding	tigger transposable element derived 2
ENSG00000128872.9	2.88051	-0.612531	1.33998e-05	0.00153338	0.02	0	0.1	0.1	Up	TMOD2	chr15	protein_coding	tropomodulin 2 (neuronal)
ENSG00000129437.9	5.56122	-2.14763	0.00109423	0.0289386	0	0	0.16	0.25	Up	KLK14	chr19	protein_coding	kallikrein-related peptidase 14
ENSG00000146453.12	2.15228	-0.934569	0.00121296	0.0314154	0.02	0.12	0.43	0.24	Up	PNLDC1	chr6	protein_coding	poly(A)-specific ribonuclease (PARN)-like domain containing 1
ENSG00000238273.3	4.42401	-1.1612	1.07237e-05	0.00130316	0.02	0	0.38	0.1	Up	AC012360.6	chr2	antisense
ENSG00000261135.1	1.5995	0.294255	0.0011097	0.029218	0.78	0.12	1.54	1.35	Up	RP4-798A10.7	chr1	lincRNA
ENSG00000271430.1	1.62076	1.44284	0.000104516	0.00646155	0.3	0.29	1.29	0.64	Up	RP3-368A4.5	chrX	sense_intronic
ENSG00000236255.1	2.03896	0.729877	1.24373e-05	0.00145829	0.08	0.19	0.83	0.33	Up	AC009404.2	chr2	lincRNA
ENSG00000255449.1	5.56608	-2.14491	0.00109423	0.0289386	0	0	0.43	0.26	Up	RP11-91P24.6	chr11	antisense
ENSG00000271533.1	2.37226	-0.154971	3.00956e-05	0.0026531	0.05	0.07	0.49	0.2	Up	RP3-368A4.6	chrX	sense_intronic
ENSG00000136010.13	1.18912	2.56524	0.00156408	0.037895	0.25	0.61	0.99	1.06	Up	ALDH1L2	chr12	protein_coding	aldehyde dehydrogenase 1 family, member L2
ENSG00000173517.10	1.21909	5.12061	0.00057545	0.0202135	0.89	0.98	2.18	2.4	Up	PEAK1	chr15	protein_coding	pseudopodium-enriched atypical kinase 1
ENSG00000227543.4	2.78392	-0.945212	0.000154665	0.00810865	0	0.06	0.19	0.24	Up	SPAG5-AS1	chr17	processed_transcript	SPAG5 antisense RNA 1
ENSG00000255176.1	6.59294	-1.43276	2.31323e-06	0.000447638	0	0	0.16	0.55	Up	AP002954.3	chr11	antisense
ENSG00000227627.1	6.10372	-1.79063	7.34591e-05	0.0048704	0	0	0.63	0.44	Up	RP1-101K10.6	chr6	antisense
ENSG00000137745.11	7.22547	-0.932898	5.58232e-09	3.90795e-06	0	0	0.16	0.39	Up	MMP13	chr11	protein_coding	matrix metallopeptidase 13
ENSG00000278662.4	2.1484	0.759265	4.64875e-06	0.0007684	0.14	0.09	0.68	0.42	Up	GOLGA6L10	chr15	protein_coding	golgin A6 family-like 10
ENSG00000139209.15	1.87809	-0.515215	0.00159767	0.0384303	0.06	0.06	0.18	0.27	Up	SLC38A4	chr12	protein_coding	solute carrier family 38, member 4
ENSG00000229222.1	2.53283	-1.12628	0.000830003	0.0251665	0	0.14	0.44	0.45	Up	KRT18P4	chr20	processed_pseudogene	keratin 18 pseudogene 4
ENSG00000258232.2	5.454	-2.21335	0.00192837	0.0409813	0	0	0.45	0.21	Up	RP11-161H23.5	chr12	antisense
ENSG00000069702.10	1.1068	4.34771	0.00194237	0.0411686	1.62	1.7	3.81	3.72	Up	TGFBR3	chr1	protein_coding	transforming growth factor, beta receptor III
ENSG00000132932.16	6.97287	-1.13857	6.50861e-08	2.86885e-05	0	0	0.07	0.07	Up	ATP8A2	chr13	protein_coding	ATPase, aminophospholipid transporter, class I, type 8A, member 2
ENSG00000261101.2	5.56446	-2.14582	0.00109423	0.0289386	0	0	0.41	0.33	Up	RP4-545K15.5	chrX	sense_overlapping
ENSG00000272661.1	6.24188	-1.69255	2.63878e-05	0.00237012	0	0	0.6	0.76	Up	RP4-548D19.3	chr7	antisense
ENSG00000244480.1	6.36485	-1.60274	9.76248e-06	0.00121658	0	0	0.14	0.47	Up	AC005154.7	chr7	transcribed_processed_pseudogene
ENSG00000278472.1	5.44574	-2.21795	0.00192837	0.0409813	0	0	0.25	0.72	Up	RP11-74D7.3	chr15	sense_intronic
ENSG00000278829.1	6.24605	-1.69008	2.63878e-05	0.00237012	0	0	0.56	0.4	Up	RP11-358B23.7	chr17	sense_intronic
ENSG00000279255.1	5.44244	-2.21978	0.00192837	0.0409813	0	0	0.03	0.28	Up	LA16c-380A1.2	chr16	TEC
ENSG00000198625.12	1.48151	4.59841	3.67565e-05	0.00309032	1	1.26	3.83	2.8	Up	MDM4	chr1	protein_coding	MDM4, p53 regulator
ENSG00000254676.1	5.66205	-2.08418	0.000626635	0.0205161	0	0	0.13	0.44	Up	RP11-727A23.4	chr11	sense_overlapping
ENSG00000100767.15	1.24056	2.09357	0.00139088	0.0352189	0.26	0.48	0.78	1.06	Up	PAPLN	chr14	protein_coding	papilin, proteoglycan-like sulfated glycoprotein
ENSG00000107186.16	1.65063	3.59093	7.22174e-06	0.0010036	0.6	0.75	2.54	1.89	Up	MPDZ	chr9	protein_coding	multiple PDZ domain protein
ENSG00000269044.2	1.95089	0.422195	5.10998e-05	0.00389832	0.34	0.28	1.83	0.69	Up	CTC-429P9.3	chr19	sense_intronic
ENSG00000280123.1	1.58415	0.339757	0.00115605	0.0301714	0.19	0.29	0.72	0.81	Up	RP11-267M23.1	chr8	TEC
ENSG00000260578.1	2.44342	-0.725031	0.000149973	0.00793256	0.07	0.01	0.29	0.22	Up	CTD-2541J13.1	chr18	lincRNA
ENSG00000106328.9	5.66998	-2.0797	0.000626635	0.0205161	0	0	0.14	0.1	Up	FSCN3	chr7	protein_coding	fascin actin-bundling protein 3, testicular
ENSG00000180626.9	1.51511	2.0905	0.000109885	0.00667217	0.23	0.56	1.34	1.01	Up	ZNF594	chr17	protein_coding	zinc finger protein 594
ENSG00000233338.1	5.44904	-2.21611	0.00192837	0.0409813	0	0	0.14	0.19	Up	TLR8-AS1	chrX	antisense	TLR8 antisense RNA 1
ENSG00000182109.7	2.14136	0.428086	1.20912e-05	0.00143897	0.21	0.1	1	0.46	Up	RP11-69E11.4	chr1	antisense
ENSG00000032742.17	1.32172	2.21857	0.000586433	0.0204968	0.4	1.1	1.73	2.2	Up	IFT88	chr13	protein_coding	intraflagellar transport 88
ENSG00000255583.2	1.57503	0.775893	0.000469919	0.0172342	0.37	0.13	0.75	0.83	Up	RP11-415I12.2	chr12	transcribed_unprocessed_pseudogene
ENSG00000104205.12	2.93847	0.291854	6.19682e-08	2.83648e-05	0.03	0.07	0.6	0.18	Up	SGK3	chr8	protein_coding	serum/glucocorticoid regulated kinase family, member 3
ENSG00000149212.10	1.88631	1.97709	2.50659e-06	0.000476232	0.08	0.21	0.73	0.39	Up	SESN3	chr11	protein_coding	sestrin 3
ENSG00000279738.1	1.88093	0.865807	3.7289e-05	0.00309251	0.02	0.04	0.11	0.15	Up	RP5-1014D13.2	chr22	sense_overlapping
ENSG00000260329.1	1.42421	0.826439	0.00121768	0.0315035	0.62	0.5	1.76	1.39	Up	RP11-412D9.4	chr12	antisense
ENSG00000165917.9	5.86668	-1.9526	0.000211004	0.00971433	0	0	0.28	0.04	Up	RAPSN	chr11	protein_coding	receptor-associated protein of the synapse
ENSG00000129682.13	5.55637	-2.15035	0.00109423	0.0289386	0	0	0	0.02	Up	FGF13	chrX	protein_coding	fibroblast growth factor 13
ENSG00000264204.2	2.55278	-0.459105	2.77401e-05	0.00248222	0.04	0.11	0.48	0.5	Up	AGAP7P	chr10	unprocessed_pseudogene	ArfGAP with GTPase domain, ankyrin repeat and PH domain 7, pseudogene
ENSG00000243107.1	5.77462	-2.013	0.000362063	0.0137665	0	0	0.31	0.05	Up	AC000120.7	chr7	sense_overlapping
ENSG00000175066.15	1.10564	4.90697	0.00180424	0.0409813	1.06	2.47	4.4	3.54	Up	GK5	chr3	protein_coding	glycerol kinase 5 (putative)
ENSG00000241322.8	1.41669	0.620457	0.00195482	0.0413588	0.24	0.1	0.62	0.35	Up	CDRT1	chr17	protein_coding	CMT1A duplicated region transcript 1
ENSG00000248405.9	5.56932	-2.14309	0.00109423	0.0289386	0	0	0.14	0.04	Up	PRR5-ARHGAP8	chr22	protein_coding	PRR5-ARHGAP8 readthrough
ENSG00000250349.3	6.03794	-1.83737	7.34591e-05	0.0048704	0	0	0.72	0	Up	RP5-972B16.2	chrX	protein_coding
ENSG00000152192.7	5.46063	-2.20966	0.00192837	0.0409813	0	0	0.1	0	Up	POU4F1	chr13	protein_coding	POU class 4 homeobox 1
ENSG00000280033.1	5.76528	-2.01831	0.000362063	0.0137665	0	0	0.25	0.28	Up	CTD-2095E4.3	chr17	TEC
ENSG00000152689.17	1.41436	1.51823	0.000574141	0.0202135	0.21	0.3	0.61	0.82	Up	RASGRP3	chr2	protein_coding	RAS guanyl releasing protein 3 (calcium and DAG-regulated)
ENSG00000271335.5	1.60272	0.793147	0.000369742	0.013925	0.35	0.68	1.67	1.63	Up	RP11-324I22.4	chr10	antisense
ENSG00000254694.1	6.0247	-1.84504	0.000123998	0.00687972	0	0	0.95	0.91	Up	RP11-50B3.4	chr11	antisense
ENSG00000242622.1	1.6257	0.187465	0.000964787	0.0284911	0.34	0.15	0.65	0.94	Up	RP11-18H7.1	chr3	lincRNA
ENSG00000223379.1	6.18869	-1.73237	2.63878e-05	0.00237012	0	0	1.55	0	Up	RP11-374M1.4	chr9	lincRNA
ENSG00000267340.1	5.56122	-2.14763	0.00109423	0.0289386	0	0	0.96	1.48	Up	RP11-242D8.3	chr17	processed_pseudogene
ENSG00000281398.2	1.75485	1.7913	1.45246e-05	0.00164626	1.78	1.42	6.2	5.19	Up	SNHG4	chr5	processed_transcript	small nucleolar RNA host gene 4
ENSG00000262772.1	2.91705	-1.16584	0.000309019	0.0129952	0	0.08	0.21	0.43	Up	RP11-353N14.2	chr17	lincRNA
ENSG00000163637.11	6.70993	-1.3456	9.1478e-07	0.00021558	0	0	0.09	0.04	Up	PRICKLE2	chr3	protein_coding	prickle homolog 2 (Drosophila)
ENSG00000272979.1	3.54748	-1.78917	0.00093262	0.0276786	0	0.11	0.71	0.85	Up	RP11-647K16.1	chr2	antisense
ENSG00000236337.1	6.32253	-1.6363	1.59929e-05	0.00165506	0	0	2.22	0.21	Up	FMR1-IT1	chrX	sense_intronic	FMR1 intronic transcript 1
ENSG00000229348.1	5.57094	-2.14218	0.00109423	0.0289386	0	0	0.77	0.13	Up	HYI-AS1	chr1	antisense	HYI antisense RNA 1
ENSG00000280138.1	2.01887	2.18592	3.8993e-07	0.000111821	0.08	0.09	0.42	0.31	Up	RP11-463O12.5	chr12	TEC
ENSG00000230650.1	1.64593	0.132848	0.000914621	0.0273314	0.16	0.12	0.72	0.2	Up	AC112229.1	chr2	processed_pseudogene
ENSG00000135363.11	6.55231	-1.46538	2.31323e-06	0.000447638	0	0	0.25	0.15	Up	LMO2	chr11	protein_coding	LIM domain only 2 (rhombotin-like 1)
ENSG00000104154.6	3.26378	-0.57816	2.46491e-06	0.000473143	0	0.03	0.07	0.19	Up	SLC30A4	chr15	protein_coding	solute carrier family 30 (zinc transporter), member 4
ENSG00000161664.6	5.67952	-2.07431	0.000626635	0.0205161	0	0	0.25	0	Up	ASB16	chr17	protein_coding	ankyrin repeat and SOCS box containing 16
ENSG00000127364.3	5.56608	-2.14491	0.00109423	0.0289386	0	0	0.13	0.08	Up	TAS2R4	chr7	protein_coding	taste receptor, type 2, member 4
ENSG00000196705.8	1.30251	3.75107	0.000325116	0.013624	0.39	0.61	1.61	0.98	Up	ZNF431	chr19	protein_coding	zinc finger protein 431
ENSG00000232656.7	6.90356	-1.19595	1.53629e-07	5.62565e-05	0	0	0.86	0.11	Up	IDI2-AS1	chr10	antisense	IDI2 antisense RNA 1
ENSG00000198315.10	1.22738	4.78781	0.000557271	0.0198565	1.55	2.48	5.47	4.41	Up	ZKSCAN8	chr6	protein_coding	zinc finger with KRAB and SCAN domains 8
ENSG00000228459.3	5.46063	-2.20966	0.00192837	0.0409813	0	0	0.68	0	Up	LINC01546	chrX	lincRNA	long intergenic non-protein coding RNA 1546
ENSG00000178904.18	1.5225	3.56064	3.25061e-05	0.0028341	0.46	0.88	2.3	1.72	Up	DPY19L3	chr19	protein_coding	dpy-19-like 3 (C. elegans)
ENSG00000232063.1	1.25445	1.76993	0.00164761	0.0390601	0.61	1.03	1.94	2.18	Up	RP11-307E17.8	chr9	lincRNA
ENSG00000257594.3	1.36321	1.71583	0.000647612	0.0210006	0.3	0.3	1.03	0.59	Up	GALNT4	chr12	protein_coding	polypeptide N-acetylgalactosaminyltransferase 4
ENSG00000259366.1	3.16565	0.0238922	1.05349e-07	4.04437e-05	0.41	0.17	4.14	1.46	Up	CTD-2647L4.4	chr8	sense_intronic
ENSG00000173681.16	1.36444	1.88129	0.000540999	0.019504	0.16	0.39	0.87	0.62	Up	CXorf23	chrX	protein_coding	chromosome X open reading frame 23
ENSG00000275329.1	5.45235	-2.21427	0.00192837	0.0409813	0	0	0.14	0.1	Up	RP11-83N9.6	chr9	lincRNA
ENSG00000186951.16	1.12802	3.77181	0.00177378	0.0409813	0.75	0.79	1.65	1.89	Up	PPARA	chr22	protein_coding	peroxisome proliferator-activated receptor alpha
ENSG00000111837.11	6.44483	-1.54653	6.0008e-06	0.000855275	0	0	0.18	0.03	Up	MAK	chr6	protein_coding	male germ cell-associated kinase
ENSG00000260751.2	1.65958	-0.248905	0.00204298	0.0427804	0.4	0.22	1.37	0.71	Up	CTD-2196E14.6	chr16	sense_intronic
ENSG00000279425.1	6.23771	-1.69501	2.63878e-05	0.00237012	0	0	0.1	0.25	Up	CTD-2017D11.2	chr19	TEC
ENSG00000204661.9	3.95815	-1.50617	5.63203e-05	0.00420231	0.03	0	0.33	0.32	Up	C5orf60	chr5	processed_transcript	chromosome 5 open reading frame 60
ENSG00000224934.2	2.26823	-0.852855	0.00066392	0.0210888	0.02	0.08	0.28	0.19	Up	RP11-441O15.3	chr10	lincRNA
ENSG00000274877.1	1.78395	-0.0742745	0.000535884	0.0193847	0.04	0.17	0.33	0.44	Up	RP11-65I12.1	chr2	antisense
ENSG00000235795.1	6.29521	-1.65256	1.59929e-05	0.00165506	0	0	0	1.2	Up	RP11-421L21.2	chr1	antisense
ENSG00000230658.1	2.16282	0.0202618	3.66447e-05	0.00309032	0.11	0.12	0.77	0.33	Up	KLHL7-AS1	chr7	lincRNA	KLHL7 antisense RNA 1 (head to head)
ENSG00000279406.1	2.72361	-0.732126	6.07606e-05	0.0044227	0.04	0.06	0.32	0.45	Up	RP11-327E2.5	chr10	TEC
ENSG00000143341.11	2.1259	-0.220899	0.000141832	0.00763776	0	0.03	0.09	0.04	Up	HMCN1	chr1	protein_coding	hemicentin 1
ENSG00000275996.1	3.46069	-1.84515	0.00151609	0.0371254	0.63	0	2.11	6.59	Up	SNORD27	chr11	snoRNA	small nucleolar RNA, C/D box 27
ENSG00000279019.1	5.45069	-2.21519	0.00192837	0.0409813	0	0	0.06	0.06	Up	RP11-407G23.2	chr16	TEC
ENSG00000109819.8	1.52891	1.20369	0.000342	0.0137665	0.1	0.13	0.43	0.26	Up	PPARGC1A	chr4	protein_coding	peroxisome proliferator-activated receptor gamma, coactivator 1 alpha
ENSG00000102524.11	6.38904	-1.58827	9.76248e-06	0.00121658	0	0	0.33	0	Up	TNFSF13B	chr13	protein_coding	tumor necrosis factor (ligand) superfamily, member 13b
ENSG00000274565.1	3.29539	-1.95098	0.00247689	0.0496672	0.04	0	0.36	0.13	Up	CTD-3035K23.7	chr17	antisense
ENSG00000251079.6	1.52907	0.698268	0.000827221	0.0251665	0.29	0.36	1.06	0.93	Up	BMS1P2	chr10	transcribed_unprocessed_pseudogene	BMS1 ribosome biogenesis factor pseudogene 2
ENSG00000279108.1	5.94727	-1.89815	0.000211004	0.00971433	0	0	0.22	0.12	Up	CTC-490E21.11	chr19	TEC
ENSG00000128791.11	1.16769	3.02942	0.00159844	0.0384303	0.73	1.39	2.59	2.4	Up	TWSG1	chr18	protein_coding	twisted gastrulation BMP signaling modulator 1
ENSG00000279549.1	2.96844	-1.54665	0.00219032	0.0453051	0.04	0	0.18	0.21	Up	AP000437.3	chr11	TEC
ENSG00000267198.1	2.89312	-0.601403	1.33998e-05	0.00153338	0.07	0.04	0.11	0.78	Up	RP11-798G7.6	chr17	lincRNA
ENSG00000234882.1	1.77792	-0.468875	0.00216113	0.0449644	0.1	0.28	0.69	0.69	Up	EIF3EP1	chr6	processed_pseudogene	eukaryotic translation initiation factor 3, subunit E pseudogene 1
ENSG00000021645.17	1.70305	0.950072	0.000102852	0.00639185	0.06	0.06	0.11	0.32	Up	NRXN3	chr14	protein_coding	neurexin 3
ENSG00000259562.2	6.43955	-1.54971	6.0008e-06	0.000855275	0	0	0.88	0.42	Up	RP11-762H8.2	chr15	transcribed_processed_pseudogene
ENSG00000251576.1	2.69442	-0.754706	6.07606e-05	0.0044227	0.02	0.08	0.35	0.35	Up	LINC01267	chr3	lincRNA	long intergenic non-protein coding RNA 1267
ENSG00000108622.10	5.66205	-2.08418	0.000626635	0.0205161	0	0	0.07	0.26	Up	ICAM2	chr17	protein_coding	intercellular adhesion molecule 2
ENSG00000249592.5	2.21342	-0.0424236	3.71327e-05	0.00309032	0.29	0.06	1.11	0.6	Up	RP11-440L14.1	chr4	antisense
ENSG00000225159.1	6.45012	-1.54334	6.0008e-06	0.000855275	0	0	1.05	0	Up	NPM1P39	chr1	processed_pseudogene	nucleophosmin 1 (nucleolar phosphoprotein B23, numatrin) pseudogene 39
ENSG00000267769.1	6.01297	-1.85186	0.000123998	0.00687972	0	0	0.07	1.22	Up	CTB-50L17.9	chr19	antisense
ENSG00000272994.1	1.39842	1.92533	0.00041975	0.0156352	0.64	0.42	1.99	0.97	Up	RP11-332H14.2	chr2	lincRNA
ENSG00000235142.7	5.45897	-2.21059	0.00192837	0.0409813	0	0	0.07	0.01	Up	RP1-60O19.1	chr6	lincRNA
ENSG00000262652.1	5.46063	-2.20966	0.00192837	0.0409813	0	0	0.77	0	Up	RP13-638C3.2	chr17	sense_intronic
ENSG00000124171.8	1.20154	2.86451	0.00125336	0.0321918	0.94	0.73	1.93	2.12	Up	PARD6B	chr20	protein_coding	par-6 family cell polarity regulator beta
ENSG00000196569.11	6.10804	-1.7881	7.34591e-05	0.0048704	0	0	0.05	0.02	Up	LAMA2	chr6	protein_coding	laminin, alpha 2
ENSG00000279145.1	6.36351	-1.60354	9.76248e-06	0.00121658	0	0	0.03	0.12	Up	RP11-547D13.1	chr15	TEC
ENSG00000130032.15	2.55588	0.679382	1.71881e-07	6.01635e-05	0.1	0.02	0.47	0.3	Up	PRRG3	chrX	protein_coding	proline rich Gla (G-carboxyglutamic acid) 3 (transmembrane)
ENSG00000104490.17	6.35815	-1.60675	9.76248e-06	0.00121658	0	0	0	0.2	Up	NCALD	chr8	protein_coding	neurocalcin delta
ENSG00000247092.6	1.40522	0.920557	0.00133679	0.0340303	0.5	0.66	2.06	1.17	Up	SNHG10	chr14	antisense	small nucleolar RNA host gene 10
ENSG00000177483.11	5.5677	-2.144	0.00109423	0.0289386	0	0	0.08	0.03	Up	RBM44	chr2	protein_coding	RNA binding motif protein 44
ENSG00000227525.4	5.46063	-2.20966	0.00192837	0.0409813	0	0	0.62	0	Up	RPL7P6	chr12	processed_pseudogene	ribosomal protein L7 pseudogene 6
ENSG00000124743.5	4.61864	-1.00858	2.29353e-06	0.000447638	0	0.01	0.15	0.1	Up	KLHL31	chr6	protein_coding	kelch-like family member 31
ENSG00000188219.14	5.45566	-2.21243	0.00192837	0.0409813	0	0	0.08	0.03	Up	POTEE	chr2	protein_coding	POTE ankyrin domain family, member E
ENSG00000267632.1	2.16992	-0.579116	0.000308889	0.0129952	0.21	0	0.61	0.4	Up	RP11-400F19.18	chr17	sense_intronic
ENSG00000245904.3	6.38097	-1.59309	9.76248e-06	0.00121658	0	0	0.09	0.03	Up	RP11-796E2.4	chr12	antisense
ENSG00000280157.1	5.46063	-2.20966	0.00192837	0.0409813	0	0	0.2	0	Up	RP11-520H14.7	chr1	TEC
ENSG00000073737.16	5.57094	-2.14218	0.00109423	0.0289386	0	0	0.11	0.02	Up	DHRS9	chr2	protein_coding	dehydrogenase/reductase (SDR family) member 9
ENSG00000224892.6	5.44574	-2.21795	0.00192837	0.0409813	0	0	0.11	0.33	Up	RPS4XP16	chr13	transcribed_processed_pseudogene	ribosomal protein S4X pseudogene 16
ENSG00000233251.7	1.9859	0.447952	3.71068e-05	0.00309032	0.07	0.18	0.6	0.45	Up	AC007743.1	chr2	antisense
ENSG00000261773.1	5.94278	-1.90074	0.000211004	0.00971433	0	0	0.38	0.41	Up	WI2-89031B12.1	chrX	sense_overlapping
ENSG00000236814.1	6.18018	-1.73736	4.38607e-05	0.00338952	0	0	0.46	0.19	Up	RP11-446E9.1	chr8	processed_pseudogene
ENSG00000263069.5	5.67634	-2.07611	0.000626635	0.0205161	0	0	0.13	0.02	Up	CTD-2047H16.4	chr17	antisense
ENSG00000240211.1	5.94278	-1.90074	0.000211004	0.00971433	0	0	1	1.08	Up	RP11-758P17.3	chr7	antisense
ENSG00000279138.1	6.01151	-1.85271	0.000123998	0.00687972	0	0	0	0.29	Up	KB-1742H10.3	chr8	TEC
ENSG00000268379.1	7.86566	-0.394543	5.56297e-11	9.64206e-08	0	0	0.7	0.48	Up	CTC-360J11.4	chr19	processed_pseudogene
ENSG00000267264.1	5.44409	-2.21887	0.00192837	0.0409813	0	0	0.15	0.7	Up	CTC-459F4.6	chr19	processed_pseudogene
ENSG00000259826.1	6.44351	-1.54732	6.0008e-06	0.000855275	0	0	0.32	0.08	Up	RP11-467D6.1	chr7	antisense
ENSG00000178440.5	6.31023	-1.64362	1.59929e-05	0.00165506	0	0	0.76	0.73	Up	LINC00843	chr10	lincRNA	long intergenic non-protein coding RNA 843
ENSG00000273329.1	1.40274	1.3894	0.00067762	0.0213625	0.15	0.21	0.57	0.41	Up	RP11-448A19.1	chr7	lincRNA
ENSG00000179978.11	6.44219	-1.54812	6.0008e-06	0.000855275	0	0	0.19	0.06	Up	RP11-1319K7.1	chr5	unprocessed_pseudogene
ENSG00000279026.1	6.36888	-1.60033	9.76248e-06	0.00121658	0	0	0.14	0.25	Up	RP3-414A15.12	chr14	TEC
ENSG00000277739.1	7.19351	3.74731	1.0947e-40	2.60562e-36	2.07	0	328.05	0	Up	RNA5-8S5	chr21	rRNA	RNA, 5.8S ribosomal 5
ENSG00000101104.12	1.18326	2.33831	0.00196425	0.0414845	0.74	0.54	1.47	1.58	Up	PABPC1L	chr20	protein_coding	poly(A) binding protein, cytoplasmic 1-like
ENSG00000171408.13	1.83071	-0.432363	0.00171887	0.0404273	0	0.09	0.13	0.21	Up	PDE7B	chr6	protein_coding	phosphodiesterase 7B
ENSG00000272945.1	5.76995	-2.01566	0.000362063	0.0137665	0	0	0.65	0.31	Up	CTD-3216D2.5	chr20	sense_intronic
ENSG00000235058.1	5.5596	-2.14854	0.00109423	0.0289386	0	0	0.61	1.31	Up	ZMYND10-AS1	chr3	antisense	ZMYND10 antisense RNA 1
ENSG00000272909.1	1.64015	-0.0937537	0.00192087	0.0409813	0.15	0.24	0.92	0.37	Up	CTD-2555O16.4	chr14	antisense
ENSG00000249383.1	5.45731	-2.21151	0.00192837	0.0409813	0	0	0.22	0.04	Up	RP11-1018N14.1	chr17	lincRNA
ENSG00000047346.12	1.21233	3.13246	0.00100852	0.0289386	0.75	0.55	1.82	1.36	Up	FAM214A	chr15	protein_coding	family with sequence similarity 214, member A
ENSG00000233061.1	6.03794	-1.83737	7.34591e-05	0.0048704	0	0	0.23	0	Up	TTLL7-IT1	chr1	sense_intronic	TTLL7 intronic transcript 1
ENSG00000248019.2	2.27637	-0.108086	3.75264e-05	0.0031014	0	0.11	0.35	0.22	Up	FAM13A-AS1	chr4	antisense	FAM13A antisense RNA 1
ENSG00000198650.10	5.56122	-2.14763	0.00109423	0.0289386	0	0	0.05	0.07	Up	TAT	chr16	protein_coding	tyrosine aminotransferase
ENSG00000110723.11	4.95373	-0.738222	8.77314e-08	3.7289e-05	0	0	0.1	0.07	Up	EXPH5	chr11	protein_coding	exophilin 5
ENSG00000280347.1	2.13962	0.350706	1.6849e-05	0.00172121	0.08	0.07	0.54	0.18	Up	AC000123.2	chr7	TEC
ENSG00000261512.2	5.56446	-2.14582	0.00109423	0.0289386	0	0	0.17	0.14	Up	RP11-46D6.1	chr16	lincRNA
ENSG00000229808.1	1.98901	-0.438471	0.00061763	0.0205161	0.2	0.13	1.31	0.11	Up	RP11-456P18.2	chr1	transcribed_processed_pseudogene
ENSG00000280184.1	6.02764	-1.84334	0.000123998	0.00687972	0	0	0.2	0.12	Up	AL023806.1	chr6	protein_coding
ENSG00000214773.1	5.77774	-2.01123	0.000362063	0.0137665	0	0	0.4	0	Up	RP11-717D12.1	chr3	sense_intronic
ENSG00000229018.5	1.88961	-0.391083	0.00108796	0.0289386	0	0.38	0.68	0.79	Up	PMS2P7	chr7	unprocessed_pseudogene	postmeiotic segregation increased 2 pseudogene 7
ENSG00000168454.11	6.9673	-1.14211	9.97305e-08	3.89145e-05	0	0	0.14	0.26	Up	TXNDC2	chr18	protein_coding	thioredoxin domain containing 2 (spermatozoa)
ENSG00000264343.5	1.49857	1.60225	0.000242821	0.010703	0.24	0.19	0.71	0.6	Up	NOTCH2NL	chr1	protein_coding	notch 2 N-terminal like
ENSG00000124602.9	5.93382	-1.90591	0.000211004	0.00971433	0	0	0.02	0.17	Up	UNC5CL	chr6	protein_coding	unc-5 homolog C (C. elegans)-like
ENSG00000260792.1	2.32085	-1.02441	0.00102366	0.0289386	0.06	0	0.22	0.11	Up	RP11-982M15.8	chr14	lincRNA
ENSG00000224418.1	5.95627	-1.89296	0.000123998	0.00687972	0	0	0.51	0	Up	STK24-AS1	chr13	antisense	STK24 antisense RNA 1
ENSG00000198774.4	1.35338	0.847726	0.00176796	0.0409813	0.06	0.24	0.52	0.3	Up	RASSF9	chr12	protein_coding	Ras association (RalGDS/AF-6) domain family (N-terminal) member 9
ENSG00000147862.14	1.84898	2.79955	1.32779e-06	0.000303884	0.21	0.33	1	1.05	Up	NFIB	chr9	protein_coding	nuclear factor I/B
ENSG00000141505.11	2.72675	-1.30156	0.00132137	0.0337461	0	0.06	0.22	0.2	Up	ASGR1	chr17	protein_coding	asialoglycoprotein receptor 1
ENSG00000235092.5	5.56284	-2.14672	0.00109423	0.0289386	0	0	0.14	0.16	Up	ID2-AS1	chr2	antisense	ID2 antisense RNA 1 (head to head)
ENSG00000259994.1	7.76972	-0.47663	1.19751e-11	2.8503e-08	0	0	0.35	0.35	Up	RP11-305E6.4	chr10	sense_overlapping
ENSG00000117480.15	2.85623	-0.891327	7.99834e-05	0.00518737	0	0.09	0.25	0.44	Up	FAAH	chr1	protein_coding	fatty acid amide hydrolase
ENSG00000244242.1	1.43933	0.498554	0.00179261	0.0409813	0.11	0.23	0.42	0.56	Up	IFITM10	chr11	protein_coding	interferon induced transmembrane protein 10
ENSG00000188779.10	2.68374	-1.33248	0.00132137	0.0337461	0	0.03	0.19	0.03	Up	SKOR1	chr15	protein_coding	SKI family transcriptional corepressor 1
ENSG00000227496.1	4.79007	-0.870808	3.61669e-07	0.000110265	0	0.03	0.47	0.57	Up	RP11-145A3.1	chr1	antisense
ENSG00000267940.1	2.31065	-1.03173	0.00141022	0.0355573	0.03	0.13	0.34	0.57	Up	RP11-290F24.6	chr11	lincRNA
ENSG00000225489.6	5.85142	-1.96134	0.000362063	0.0137665	0	0	0.06	0.17	Up	RP11-390F4.3	chr9	lincRNA
ENSG00000235501.5	5.67952	-2.07431	0.000626635	0.0205161	0	0	0.56	0	Up	RP4-639F20.1	chr1	antisense
ENSG00000129422.13	1.28782	5.00469	0.000291184	0.012533	1.95	2.57	6.34	5.22	Up	MTUS1	chr8	protein_coding	microtubule associated tumor suppressor 1
ENSG00000270804.1	1.74632	-0.10131	0.000794987	0.024353	0.19	0.54	1.42	1.17	Up	CTD-2583A14.11	chr19	transcribed_processed_pseudogene
ENSG00000261326.2	1.47028	1.19189	0.000513087	0.0186166	0.22	0.17	1	0.12	Up	LINC01355	chr1	lincRNA	long intergenic non-protein coding RNA 1355
ENSG00000124406.16	5.93083	-1.90763	0.000211004	0.00971433	0	0	0	0.06	Up	ATP8A1	chr4	protein_coding	ATPase, aminophospholipid transporter (APLT), class I, type 8A, member 1
ENSG00000146858.7	1.22705	3.15566	0.000877338	0.0265005	2.84	2.63	6.9	6.56	Up	ZC3HAV1L	chr7	protein_coding	zinc finger CCCH-type, antiviral 1-like
ENSG00000275209.1	5.38946	5.49599	6.27521e-36	7.46813e-32	16.64	61.41	1609.11	1826.31	Up	FP236383.4	chr21	miRNA
ENSG00000230325.1	1.83682	-0.0371878	0.000361681	0.0137665	0.28	1.11	3.31	1.92	Up	RP11-385F5.4	chr1	antisense
ENSG00000234509.1	2.07166	-0.990532	0.00222289	0.0457297	0.02	0.1	0.41	0.15	Up	AP000253.1	chr21	lincRNA
ENSG00000270008.1	3.46553	-1.84272	0.00151609	0.0371254	0	0.06	0.35	0.48	Up	RP11-298P3.4	chr13	processed_transcript
ENSG00000231125.2	7.34961	-0.834732	1.73953e-09	1.47873e-06	0	0	1.87	0.28	Up	AF129075.5	chr21	sense_intronic
ENSG00000260418.1	5.85142	-1.96134	0.000362063	0.0137665	0	0	0.41	1.17	Up	RP3-406A7.7	chr6	lincRNA
ENSG00000280276.1	1.40191	0.519334	0.00209112	0.0436987	0.3	0.37	1.25	0.64	Up	RP11-314C9.1	chr2	TEC
ENSG00000280099.1	6.11527	-1.78388	4.38607e-05	0.00338952	0	0	0.42	0	Up	RP11-33E12.2	chr1	TEC
ENSG00000196337.10	5.76061	-2.02097	0.000626635	0.0205161	0	0	0.04	0.12	Up	CGB7	chr19	protein_coding	chorionic gonadotropin, beta polypeptide 7
ENSG00000215032.2	1.75663	1.10286	5.73926e-05	0.00425563	0.44	0.58	2.25	1.4	Up	GNL3LP1	chr5	processed_pseudogene	guanine nucleotide binding protein-like 3 (nucleolar)-like pseudogene 1
ENSG00000269929.1	4.34743	-0.0297918	1.90099e-10	2.38143e-07	0	0.1	1.54	0.64	Up	RP11-2B6.2	chr9	lincRNA
ENSG00000261064.1	5.95177	-1.89556	0.000123998	0.00687972	0	0	0.59	0.12	Up	RP11-1000B6.3	chr15	lincRNA
ENSG00000273007.1	5.56608	-2.14491	0.00109423	0.0289386	0	0	0.18	0.11	Up	RP11-170N16.3	chr4	antisense
ENSG00000167748.10	5.94578	-1.89901	0.000211004	0.00971433	0	0	0.44	0.3	Up	KLK1	chr19	protein_coding	kallikrein 1
ENSG00000243244.5	1.71331	0.996668	8.81855e-05	0.00560375	0.16	0.12	0.45	0.53	Up	STON1	chr2	protein_coding	stonin 1
ENSG00000258441.1	2.0808	0.820885	5.55864e-06	0.000855275	0.62	0.03	1.77	1.12	Up	LINC00641	chr14	processed_transcript	long intergenic non-protein coding RNA 641
ENSG00000189423.11	1.98382	0.687668	2.1691e-05	0.00213342	0.18	0.45	2.02	0.61	Up	USP32P3	chr17	transcribed_unprocessed_pseudogene	ubiquitin specific peptidase 32 pseudogene 3
ENSG00000268205.1	1.48833	2.2551	0.000127383	0.0070511	0.41	0.63	2	1.08	Up	CTC-444N24.11	chr19	lincRNA
ENSG00000240270.1	5.46063	-2.20966	0.00192837	0.0409813	0	0	0.92	0	Up	RPL12P37	chr17	processed_pseudogene	ribosomal protein L12 pseudogene 37
ENSG00000134215.15	1.33115	2.02496	0.000665806	0.0210888	0.43	0.36	1	1.09	Up	VAV3	chr1	protein_coding	vav 3 guanine nucleotide exchange factor
ENSG00000275481.1	1.95047	-0.345699	0.000549178	0.0195975	0.14	0.01	0.43	0.2	Up	RP11-474P2.6	chr12	lincRNA
ENSG00000275632.1	1.93888	-0.744928	0.00156807	0.037895	0	0.7	1.6	1.25	Up	RP5-967N21.11	chr20	lincRNA
ENSG00000188206.6	1.77674	3.97261	1.21984e-06	0.00028189	1.33	1.23	6.58	2.62	Up	HNRNPU-AS1	chr1	antisense	HNRNPU antisense RNA 1
ENSG00000279744.1	5.15306	-0.573933	8.30512e-09	5.49235e-06	0	0.03	0.83	0.42	Up	RP13-20L14.10	chr17	TEC
ENSG00000280214.1	7.02585	-1.09828	4.26969e-08	2.03254e-05	0	0	0.52	0.12	Up	CTD-2012K14.5	chr16	TEC
ENSG00000241769.7	2.07051	-0.991215	0.00222289	0.0457297	0.02	0.09	0.35	0.15	Up	LINC00893	chrX	antisense	long intergenic non-protein coding RNA 893
ENSG00000235381.1	3.19064	-0.636228	4.5528e-06	0.000757803	0.04	0.01	0.33	0.26	Up	RP11-477D19.2	chr6	antisense
ENSG00000277744.1	7.09226	-1.04303	2.81513e-08	1.42565e-05	0	0	1.7	1.46	Up	CTC-435M10.12	chr19	sense_intronic
ENSG00000275542.1	5.67316	-2.0779	0.000626635	0.0205161	0	0	0.75	0.29	Up	RP11-455O6.9	chr17	lincRNA
ENSG00000133640.18	2.26133	-0.369664	0.000160335	0.00836905	0.03	0.04	0.27	0.12	Up	LRRIQ1	chr12	protein_coding	leucine-rich repeats and IQ motif containing 1
ENSG00000128710.5	5.85752	-1.95785	0.000362063	0.0137665	0	0	0.15	0.15	Up	HOXD10	chr2	protein_coding	homeobox D10
ENSG00000272301.1	6.84287	-1.24107	2.37948e-07	7.86616e-05	0	0	1.11	1.37	Up	RP11-111M22.4	chr11	lincRNA
ENSG00000273828.1	5.66205	-2.08418	0.000626635	0.0205161	0	0	0.19	0.68	Up	RP11-394O2.3	chr20	antisense
ENSG00000188687.15	5.57094	-2.14218	0.00109423	0.0289386	0	0	0.07	0.01	Up	SLC4A5	chr2	protein_coding	solute carrier family 4 (sodium bicarbonate cotransporter), member 5
ENSG00000139631.18	1.70565	1.50599	4.19662e-05	0.00338952	0.44	0.33	1.83	0.83	Up	CSAD	chr12	protein_coding	cysteine sulfinic acid decarboxylase
ENSG00000127863.15	6.01151	-1.85271	0.000123998	0.00687972	0	0	0	0.14	Up	TNFRSF19	chr13	protein_coding	tumor necrosis factor receptor superfamily, member 19
ENSG00000250362.1	5.95027	-1.89642	0.000123998	0.00687972	0	0	0.74	0.22	Up	AC008592.5	chr5	processed_transcript
ENSG00000139219.17	5.46063	-2.20966	0.00192837	0.0409813	0	0	0.09	0	Up	COL2A1	chr12	protein_coding	collagen, type II, alpha 1
ENSG00000260766.1	1.40509	0.565933	0.00187626	0.0409813	0.17	0.57	1.12	0.95	Up	RP11-226L15.5	chr1	sense_overlapping
ENSG00000136895.18	1.39019	1.04408	0.00107909	0.0289386	0.25	0.22	0.63	0.67	Up	GARNL3	chr9	protein_coding	GTPase activating Rap/RanGAP domain-like 3
ENSG00000163406.10	2.77064	-1.27	0.000916329	0.0273314	0	0.02	0.05	0.13	Up	SLC15A2	chr3	protein_coding	solute carrier family 15 (oligopeptide transporter), member 2
ENSG00000142408.2	1.61578	1.06951	0.000205291	0.00971433	0.04	0.16	0.38	0.28	Up	CACNG8	chr19	protein_coding	calcium channel, voltage-dependent, gamma subunit 8
ENSG00000267058.1	5.45235	-2.21427	0.00192837	0.0409813	0	0	0.12	0.08	Up	RP11-15A1.3	chr19	lincRNA
ENSG00000256232.1	5.46063	-2.20966	0.00192837	0.0409813	0	0	0.53	0	Up	RP11-771K4.1	chr12	lincRNA
ENSG00000172458.4	5.95327	-1.89469	0.000123998	0.00687972	0	0	0.31	0.04	Up	IL17D	chr13	protein_coding	interleukin 17D
ENSG00000200418.1	5.86668	-1.9526	0.000211004	0.00971433	0	0	4.33	0.59	Up	SNORA63	chr3	snoRNA	small nucleolar RNA, H/ACA box 63
ENSG00000269896.2	1.90333	0.736686	3.16184e-05	0.00277705	0.3	0.19	1.14	0.8	Up	RP4-740C4.5	chr1	transcribed_processed_pseudogene
ENSG00000278071.1	1.6418	-0.262067	0.00204298	0.0427804	0.47	0.35	2.2	0.52	Up	RP11-736N17.10	chr14	lincRNA
ENSG00000277007.1	6.94551	-1.16262	9.97305e-08	3.89145e-05	0	0	0.42	0.07	Up	RP11-392O17.2	chr1	lincRNA
ENSG00000082258.12	1.53129	3.47601	3.2427e-05	0.0028341	0.54	0.96	2.92	1.6	Up	CCNT2	chr2	protein_coding	cyclin T2
ENSG00000231249.1	3.7689	-1.63976	0.000223889	0.0100358	0	0.05	0.49	0.43	Up	ITPR1-AS1	chr3	antisense	ITPR1 antisense RNA 1 (head to head)
ENSG00000226763.4	2.93831	-0.831147	4.16922e-05	0.00338952	0	0.07	0.35	0.22	Up	SRRM5	chr19	protein_coding	serine/arginine repetitive matrix 5
ENSG00000172915.18	1.4989	1.12148	0.000405719	0.0151775	0.09	0.07	0.2	0.3	Up	NBEA	chr13	protein_coding	neurobeachin
ENSG00000260917.1	1.39952	2.68635	0.000197522	0.00971433	0.92	0.57	2.03	2.11	Up	RP11-57H14.4	chr10	sense_overlapping
ENSG00000213865.7	1.40771	1.02451	0.00105402	0.0289386	0.47	0.43	0.96	1.54	Up	C8orf44	chr8	protein_coding	chromosome 8 open reading frame 44
ENSG00000164199.15	5.93979	-1.90246	0.000211004	0.00971433	0	0	0.01	0.02	Up	ADGRV1	chr5	protein_coding	adhesion G protein-coupled receptor V1
ENSG00000272281.6	5.57419	-2.14036	0.00109423	0.0289386	0	0	0.18	0	Up	TPTE2P2	chr13	transcribed_unprocessed_pseudogene	transmembrane phosphoinositide 3-phosphatase and tensin homolog 2 pseudogene 2
ENSG00000227252.1	2.38594	-0.582729	0.000109539	0.00666818	0.14	0	0.44	0.33	Up	AC105760.2	chr2	antisense
ENSG00000101638.13	2.83596	-0.649378	1.80652e-05	0.00182198	0.01	0.01	0.1	0.02	Up	ST8SIA5	chr18	protein_coding	ST8 alpha-N-acetyl-neuraminide alpha-2,8-sialyltransferase 5
ENSG00000197822.10	3.12214	-0.0112342	1.66994e-07	6.01635e-05	0.02	0.03	0.27	0.19	Up	OCLN	chr5	protein_coding	occludin
ENSG00000262877.4	1.55733	0.0711745	0.00214096	0.0446227	0.29	0.26	1	0.72	Up	RP11-1055B8.4	chr17	lincRNA
ENSG00000227992.1	3.64726	-0.611134	7.08066e-07	0.00018726	0	0.39	4.06	1.47	Up	AC108463.2	chr2	processed_pseudogene
ENSG00000230373.8	2.771	-0.480411	1.12532e-05	0.00135277	0	0.07	0.28	0.23	Up	GOLGA6L5P	chr15	transcribed_unprocessed_pseudogene	golgin A6 family-like 5, pseudogene
ENSG00000259953.1	2.13153	-0.00546427	5.51465e-05	0.00416698	0	0.13	0.5	0.11	Up	RP11-4O1.2	chr9	sense_overlapping
ENSG00000276115.1	6.32253	-1.6363	1.59929e-05	0.00165506	0	0	0.42	0.04	Up	RP11-817I4.2	chr12	sense_intronic
ENSG00000216990.2	5.67952	-2.07431	0.000626635	0.0205161	0	0	0.32	0	Up	HSPD1P10	chr6	processed_pseudogene	heat shock 60kDa protein 1 (chaperonin) pseudogene 10
ENSG00000251867.3	5.56284	-2.14672	0.00109423	0.0289386	0	0	0.22	0.24	Up	RP11-48B3.5	chr8	antisense
ENSG00000176896.8	2.04896	0.0311717	0.000136295	0.00750947	0.1	0.1	0.5	0.42	Up	TCEANC	chrX	protein_coding	transcription elongation factor A (SII) N-terminal and central domain containing
ENSG00000281392.1	7.84856	-0.410215	7.59983e-11	1.06407e-07	0	0	0.34	0.15	Up	LINC00506	chr3	lincRNA	long intergenic non-protein coding RNA 506
ENSG00000280308.1	5.44739	-2.21703	0.00192837	0.0409813	0	0	0.41	0.78	Up	FKSG61	chr14	protein_coding
ENSG00000172940.11	3.62184	-1.73912	0.000576632	0.0202135	0.02	0	0.1	0.17	Up	SLC22A13	chr3	protein_coding	solute carrier family 22 (organic anion/urate transporter), member 13
ENSG00000224950.2	1.74147	-0.190583	0.001105	0.0291266	0.16	0.12	0.33	0.65	Up	RP5-1086K13.1	chr1	lincRNA
ENSG00000140057.8	3.00849	-0.29388	9.60473e-07	0.000224129	0	0.06	0.23	0.32	Up	AK7	chr14	protein_coding	adenylate kinase 7
ENSG00000125848.9	5.55637	-2.15035	0.00109423	0.0289386	0	0	0.02	0.08	Up	FLRT3	chr20	protein_coding	fibronectin leucine rich transmembrane protein 3
ENSG00000275437.1	2.11301	0.480636	1.2187e-05	0.00144316	0.22	0.01	0.39	0.68	Up	RP5-908M14.10	chr20	sense_intronic
ENSG00000173209.22	1.54847	4.08011	1.95909e-05	0.00196752	1.18	1.14	4.64	2.49	Up	AHSA2	chr2	protein_coding	AHA1, activator of heat shock 90kDa protein ATPase homolog 2 (yeast)
ENSG00000247982.6	3.21074	-0.62288	3.34639e-06	0.000595773	0.06	0	0.6	0	Up	LINC00926	chr15	lincRNA	long intergenic non-protein coding RNA 926
ENSG00000215866.7	3.15602	-1.41847	0.000666279	0.0210888	0	0.05	0.31	0.2	Up	LINC01356	chr1	lincRNA	long intergenic non-protein coding RNA 1356
ENSG00000198838.11	6.1816	-1.73653	4.38607e-05	0.00338952	0	0	0.04	0.01	Up	RYR3	chr15	protein_coding	ryanodine receptor 3
ENSG00000233448.2	2.67351	-1.33851	0.00190851	0.0409813	0	0.27	1.03	0.85	Up	PMS2P9	chr7	transcribed_unprocessed_pseudogene	postmeiotic segregation increased 2 pseudogene 9
ENSG00000068878.14	1.10989	6.10815	0.00156941	0.037895	3.87	7.36	13.31	12.09	Up	PSME4	chr2	protein_coding	proteasome (prosome, macropain) activator subunit 4
ENSG00000273046.1	5.76995	-2.01566	0.000362063	0.0137665	0	0	0.27	0.13	Up	RP11-834C11.14	chr12	processed_transcript
ENSG00000264456.1	6.66545	-1.3806	9.1478e-07	0.00021558	0	0	0.53	0.11	Up	RP11-848P1.2	chr17	sense_intronic
ENSG00000200090.1	5.77774	-2.01123	0.000362063	0.0137665	0	0	5.77	0	Up	Y_RNA	chr11	misc_RNA
ENSG00000162438.11	6.385	-1.59068	9.76248e-06	0.00121658	0	0	0.22	0.03	Up	CTRC	chr1	protein_coding	chymotrypsin C (caldecrin)
ENSG00000139890.9	6.37156	-1.59872	9.76248e-06	0.00121658	0	0	0.17	0.21	Up	REM2	chr14	protein_coding	RAS (RAD and GEM)-like GTP binding 2
ENSG00000280038.1	5.46063	-2.20966	0.00192837	0.0409813	0	0	0.14	0	Up	DNM1P41	chr15	TEC	dynamin 1 pseudogene 41
ENSG00000279233.1	1.20121	2.10857	0.00190681	0.0409813	0.52	0.82	1.55	1.68	Up	RP11-158L12.4	chr12	TEC
ENSG00000138271.5	5.7715	-2.01477	0.000362063	0.0137665	0	0	0.26	0.09	Up	GPR87	chr3	protein_coding	G protein-coupled receptor 87
ENSG00000157017.15	5.85905	-1.95697	0.000362063	0.0137665	0	0	0.24	0.18	Up	GHRL	chr3	protein_coding	ghrelin/obestatin prepropeptide
ENSG00000270055.1	2.18858	2.6239	2.16022e-08	1.16858e-05	0.37	1.32	5.05	3	Up	CTD-3092A11.2	chr15	sense_intronic
ENSG00000183889.12	3.70013	-0.223269	1.87001e-08	1.03511e-05	0.06	0.06	0.17	1.45	Up	NPIPA5	chr16	protein_coding	nuclear pore complex interacting protein family, member A5
ENSG00000139572.3	5.45897	-2.21059	0.00192837	0.0409813	0	0	0.2	0.02	Up	GPR84	chr12	protein_coding	G protein-coupled receptor 84
ENSG00000261488.1	1.55312	0.990329	0.000366369	0.0138418	0.51	0.38	2.48	0.28	Up	RP11-757F18.5	chr3	antisense
ENSG00000230551.4	1.54146	3.42856	2.91206e-05	0.00259598	0.69	0.45	2.36	1.15	Up	CTB-89H12.4	chr5	processed_transcript
ENSG00000173261.8	6.36888	-1.60033	9.76248e-06	0.00121658	0	0	0.48	0.86	Up	PLAC8L1	chr5	protein_coding	PLAC8-like 1
ENSG00000230537.1	2.44202	-1.18983	0.00164277	0.0390208	0.06	0.17	0.84	0.49	Up	RP11-305L7.1	chr9	lincRNA
ENSG00000077063.10	1.51927	2.04759	0.000111632	0.00676099	0.42	0.21	0.79	1.12	Up	CTTNBP2	chr7	protein_coding	cortactin binding protein 2
ENSG00000278576.1	5.95177	-1.89556	0.000123998	0.00687972	0	0	0.17	0.03	Up	RP11-507K2.6	chr14	sense_intronic
ENSG00000177839.6	6.02324	-1.8459	0.000123998	0.00687972	0	0	0.07	0.08	Up	PCDHB9	chr5	protein_coding	protocadherin beta 9
ENSG00000250433.1	5.55314	-2.15216	0.00109423	0.0289386	0	0	0	0.18	Up	CLSTN2-AS1	chr3	antisense	CLSTN2 antisense RNA 1
ENSG00000047365.11	1.21876	1.63491	0.0022714	0.0465666	0.22	0.21	0.65	0.41	Up	ARAP2	chr4	protein_coding	ArfGAP with RhoGAP domain, ankyrin repeat and PH domain 2
ENSG00000264112.1	1.46517	1.03267	0.000620657	0.0205161	0.24	0.08	0.72	0.21	Up	RP11-159D12.2	chr17	lincRNA
ENSG00000018189.12	1.33006	2.52859	0.000461608	0.0169817	0.33	0.56	1.46	0.87	Up	RUFY3	chr4	protein_coding	RUN and FYVE domain containing 3
ENSG00000104177.17	5.85752	-1.95785	0.000362063	0.0137665	0	0	0.03	0.02	Up	MYEF2	chr15	protein_coding	myelin expression factor 2
ENSG00000222112.1	5.45235	-2.21427	0.00192837	0.0409813	0	0	0.89	0.61	Up	RN7SKP16	chr1	misc_RNA	RNA, 7SK small nuclear pseudogene 16
ENSG00000261770.1	3.49906	-0.728372	2.55064e-06	0.000478033	0.01	0.02	0.35	0.12	Up	CTC-459F4.1	chr19	lincRNA
ENSG00000185352.8	1.45634	2.01657	0.000213977	0.00981087	0.21	0.27	0.68	0.73	Up	HS6ST3	chr13	protein_coding	heparan sulfate 6-O-sulfotransferase 3
ENSG00000254165.1	6.11382	-1.78473	4.38607e-05	0.00338952	0	0	0.97	0.05	Up	RP11-503E24.2	chr8	antisense
ENSG00000225173.1	5.9368	-1.90419	0.000211004	0.00971433	0	0	0.21	0.67	Up	XXbac-BPG308K3.5	chr6	lincRNA
ENSG00000108405.3	3.88641	-1.55625	8.87579e-05	0.00560375	0	0.02	0.04	0.27	Up	P2RX1	chr17	protein_coding	purinergic receptor P2X, ligand gated ion channel, 1
ENSG00000224975.1	7.17924	-0.974653	8.30706e-09	5.49235e-06	0	0	1.37	0.23	Up	INE1	chrX	sense_intronic	inactivation escape 1 (non-protein coding)
ENSG00000146530.11	1.90503	0.453596	8.83025e-05	0.00560375	0.13	0.05	0.47	0.25	Up	VWDE	chr7	protein_coding	von Willebrand factor D and EGF domains
ENSG00000271976.1	1.75576	0.403847	0.000327506	0.013676	0.11	0.28	0.62	0.76	Up	RP11-884K10.7	chr3	antisense
ENSG00000197558.11	6.24049	-1.69337	2.63878e-05	0.00237012	0	0	0.02	0.03	Up	SSPO	chr7	protein_coding	SCO-spondin
ENSG00000240731.1	2.14857	-0.595733	0.000613875	0.0205161	0.82	0.12	3.65	0.85	Up	RP5-890O3.9	chr1	sense_intronic
ENSG00000129675.15	1.19355	3.21002	0.00114359	0.0300218	0.65	0.92	1.84	1.95	Up	ARHGEF6	chrX	protein_coding	Rac/Cdc42 guanine nucleotide exchange factor (GEF) 6
ENSG00000132274.15	6.10227	-1.79147	7.34591e-05	0.0048704	0	0	0.13	0.11	Up	TRIM22	chr11	protein_coding	tripartite motif containing 22
ENSG00000105784.15	2.14367	-0.940031	0.0016415	0.0390208	0	0.07	0.13	0.19	Up	RUNDC3B	chr7	protein_coding	RUN domain containing 3B
ENSG00000178917.14	1.60419	1.13139	0.000185821	0.00955272	0.46	0.49	1.64	1.39	Up	ZNF852	chr3	protein_coding	zinc finger protein 852
ENSG00000276216.1	5.85905	-1.95697	0.000362063	0.0137665	0	0	0.99	0.74	Up	CH17-373J23.1	chr1	lincRNA
ENSG00000100033.16	1.54206	0.191104	0.00164431	0.0390208	0.18	0.2	0.56	0.64	Up	PRODH	chr22	protein_coding	proline dehydrogenase (oxidase) 1
ENSG00000204529.3	2.9255	-1.15978	0.000309019	0.0129952	0.16	0	0.82	0.57	Up	GUCY2EP	chr11	transcribed_unprocessed_pseudogene	guanylate cyclase 2E, pseudogene
ENSG00000257433.5	2.36563	-0.994639	0.000743842	0.0231128	0	0.07	0.25	0.12	Up	RP1-197B17.3	chr12	antisense
ENSG00000278233.1	3.23344	2.73831	6.7315e-15	2.67038e-11	14.81	0	146.99	0	Up	RNA5-8S5	chr21	rRNA	RNA, 5.8S ribosomal 5
ENSG00000139714.12	3.02846	-1.50544	0.00146982	0.0367004	0.02	0	0.08	0.14	Up	MORN3	chr12	protein_coding	MORN repeat containing 3
ENSG00000254343.2	5.76528	-2.01831	0.000362063	0.0137665	0	0	0.35	0.39	Up	RP11-760H22.2	chr8	lincRNA
ENSG00000166546.13	5.76995	-2.01566	0.000362063	0.0137665	0	0	0.07	0.03	Up	BEAN1	chr16	protein_coding	brain expressed, associated with NEDD4, 1
ENSG00000251323.2	6.18018	-1.73736	4.38607e-05	0.00338952	0	0	0.32	0.13	Up	RP11-452H21.4	chr11	lincRNA
ENSG00000268201.1	3.83138	-1.59558	0.000140602	0.00762326	0.08	0	0.62	0.86	Up	CTD-3138B18.6	chr19	sense_intronic
ENSG00000261130.5	1.36307	0.99218	0.0015698	0.037895	1.18	1.75	3.74	4.2	Up	RP11-1021N1.1	chr16	protein_coding
ENSG00000241170.2	6.11382	-1.78473	4.38607e-05	0.00338952	0	0	0.49	0.03	Up	RP11-147I3.1	chr11	transcribed_processed_pseudogene
ENSG00000259820.1	3.54578	1.59298	3.76349e-14	1.27969e-10	0.04	0.09	1.33	0.29	Up	AC083843.1	chr8	lincRNA
ENSG00000135205.14	6.08788	-1.79988	7.34591e-05	0.0048704	0	0	0	0.21	Up	CCDC146	chr7	protein_coding	coiled-coil domain containing 146
ENSG00000251634.2	5.93979	-1.90246	0.000211004	0.00971433	0	0	0.08	0.14	Up	RP11-1280N14.3	chr5	unprocessed_pseudogene
ENSG00000163293.11	1.90444	0.836176	2.34622e-05	0.00223379	0.09	0.15	0.48	0.47	Up	NIPAL1	chr4	protein_coding	NIPA-like domain containing 1
ENSG00000128573.22	2.27232	-1.05838	0.00141022	0.0355573	0.02	0.01	0.07	0.06	Up	FOXP2	chr7	protein_coding	forkhead box P2
ENSG00000232466.1	5.46063	-2.20966	0.00192837	0.0409813	0	0	1.23	0	Up	RP11-337A23.5	chr9	processed_pseudogene
ENSG00000233098.8	6.24049	-1.69337	2.63878e-05	0.00237012	0	0	0.04	0.06	Up	CCDC144NL-AS1	chr17	antisense	CCDC144NL antisense RNA 1
ENSG00000106069.20	2.40201	-0.968355	0.000743842	0.0231128	0	0.06	0.18	0.14	Up	CHN2	chr7	protein_coding	chimerin 2
ENSG00000255455.2	1.30894	1.49286	0.00134592	0.0342261	0.64	0.07	1.27	0.58	Up	RP11-890B15.3	chr11	lincRNA
ENSG00000263727.1	5.46063	-2.20966	0.00192837	0.0409813	0	0	1.7	0	Up	RP11-806L2.5	chr18	sense_intronic
ENSG00000162636.15	1.2067	4.16608	0.000759845	0.0235173	1.15	2.25	4.27	3.94	Up	FAM102B	chr1	protein_coding	family with sequence similarity 102, member B
ENSG00000144837.8	5.86363	-1.95435	0.000211004	0.00971433	0	0	0.24	0.08	Up	PLA1A	chr3	protein_coding	phospholipase A1 member A
ENSG00000243225.2	3.33254	-0.857943	1.33852e-05	0.00153338	0	0.3	2.38	0.95	Up	RP11-7F17.1	chr14	processed_pseudogene
ENSG00000077522.12	5.86057	-1.9561	0.000211004	0.00971433	0	0	0.07	0.04	Up	ACTN2	chr1	protein_coding	actinin, alpha 2
ENSG00000280367.1	3.17048	0.723588	9.54061e-10	9.4619e-07	0.08	0.08	1.2	0.35	Up	RP11-121L10.2	chr11	TEC
ENSG00000223525.1	6.32527	-1.63467	1.59929e-05	0.00165506	0	0	1.14	0	Up	RABGAP1L-IT1	chr1	sense_intronic	RABGAP1L intronic transcript 1
ENSG00000279267.1	2.91813	0.806861	4.04427e-09	3.10521e-06	0.04	0.29	1.75	0.93	Up	RP11-395L14.18	chr2	TEC
ENSG00000146350.13	1.91184	-0.622281	0.00102993	0.0289386	0	0.09	0.22	0.15	Up	TBC1D32	chr6	protein_coding	TBC1 domain family, member 32
ENSG00000249087.6	1.67399	1.21297	8.09429e-05	0.00522115	0.14	0.59	1.57	0.88	Up	ZNF436-AS1	chr1	antisense	ZNF436 antisense RNA 1
ENSG00000259084.6	5.84534	-1.96483	0.000362063	0.0137665	0	0	0	0.16	Up	RP11-1070N10.6	chr14	sense_overlapping
ENSG00000089505.17	2.00058	-0.430008	0.00061763	0.0205161	0.04	0.36	0.94	0.77	Up	CMTM1	chr16	protein_coding	CKLF-like MARVEL transmembrane domain containing 1
ENSG00000259920.1	5.86974	-1.95085	0.000211004	0.00971433	0	0	0.21	0	Up	RP11-2E11.5	chr7	lincRNA
ENSG00000233849.1	5.76061	-2.02097	0.000626635	0.0205161	0	0	0.53	1.4	Up	AC022201.5	chr2	antisense
ENSG00000180178.10	6.70628	-1.34786	9.1478e-07	0.00021558	0	0	0.16	0.13	Up	FAR2P1	chr2	transcribed_unprocessed_pseudogene	fatty acyl CoA reductase 2 pseudogene 1
ENSG00000275709.1	6.81338	-1.26664	3.70609e-07	0.000110265	0	0	1.87	0.27	Up	RP11-96O20.5	chr15	lincRNA
ENSG00000257829.1	2.95005	-0.560773	7.41314e-06	0.00100827	0.29	0.07	2.32	0.76	Up	RP11-845M18.6	chr12	antisense
ENSG00000251023.1	3.70265	-1.68523	0.000358374	0.0137665	0.01	0	0.16	0.08	Up	RP11-549J18.1	chr5	sense_intronic
ENSG00000102755.10	5.45897	-2.21059	0.00192837	0.0409813	0	0	0.03	0	Up	FLT1	chr13	protein_coding	fms-related tyrosine kinase 1
ENSG00000281183.1	8.10939	-0.181518	2.83049e-12	7.4857e-09	0	0	0.75	0.51	Up	NPTN-IT1	chr15	sense_intronic	NPTN intronic transcript 1
ENSG00000223652.2	6.24188	-1.69255	2.63878e-05	0.00237012	0	0	0.43	0.55	Up	AC106786.1	chr5	antisense
ENSG00000095564.13	1.07488	5.80014	0.00221724	0.0457297	3.22	5.78	11.48	8.39	Up	BTAF1	chr10	protein_coding	BTAF1 RNA polymerase II, B-TFIID transcription factor-associated, 170kDa
ENSG00000228434.1	1.51112	2.00541	0.000113493	0.00683886	0.9	1.08	3.08	2.84	Up	AC004951.6	chr7	lincRNA
ENSG00000267680.5	1.14598	3.56651	0.00155505	0.037895	1.42	1.92	4.73	3.04	Up	ZNF224	chr19	protein_coding	zinc finger protein 224
ENSG00000277247.1	5.57094	-2.14218	0.00109423	0.0289386	0	0	0.89	0.15	Up	RP11-785D18.3	chr12	antisense
ENSG00000166341.7	6.36083	-1.60514	9.76248e-06	0.00121658	0	0	0.01	0.07	Up	DCHS1	chr11	protein_coding	dachsous cadherin-related 1
ENSG00000279579.3	5.66047	-2.08507	0.000626635	0.0205161	0	0	0.09	0.52	Up	bP-2189O9.3	chr21	lincRNA
ENSG00000268964.1	1.65578	1.49441	6.70627e-05	0.00477912	0.28	0.69	1.39	1.83	Up	ERVV-2	chr19	protein_coding	endogenous retrovirus group V, member 2
ENSG00000224959.1	2.22674	-0.394644	0.000204542	0.00971433	0.15	0.31	1.17	1.16	Up	AC017002.2	chr2	lincRNA
ENSG00000248187.1	5.57257	-2.14127	0.00109423	0.0289386	0	0	0.28	0.02	Up	RP11-184M15.1	chr4	lincRNA
ENSG00000237940.3	5.94727	-1.89815	0.000211004	0.00971433	0	0	0.18	0.1	Up	AC093642.3	chr2	lincRNA
ENSG00000226849.1	5.76061	-2.02097	0.000626635	0.0205161	0	0	0.06	0.15	Up	RP4-635E18.7	chr1	antisense
ENSG00000163590.13	6.48666	-1.51318	6.0008e-06	0.000855275	0	0	0.03	0.05	Up	PPM1L	chr3	protein_coding	protein phosphatase, Mg2+/Mn2+ dependent, 1L
ENSG00000251013.1	3.89592	-0.408062	4.55423e-08	2.12549e-05	0	0.14	1.27	1.03	Up	GAPDHP62	chr8	processed_pseudogene	glyceraldehyde 3 phosphate dehydrogenase pseudogene 62
ENSG00000247373.3	1.93796	1.04115	1.22808e-05	0.00144707	0.07	0.1	0.54	0.17	Up	RP11-486O12.2	chr12	lincRNA
ENSG00000265864.1	6.1731	-1.74153	4.38607e-05	0.00338952	0	0	4.39	5.15	Up	AC092117.2	chr16	miRNA
ENSG00000159289.6	5.55637	-2.15035	0.00109423	0.0289386	0	0	0.02	0.13	Up	GOLGA6A	chr15	protein_coding	golgin A6 family, member A
ENSG00000267079.1	5.86363	-1.95435	0.000211004	0.00971433	0	0	1.2	0.39	Up	RP11-820I16.1	chr18	lincRNA
ENSG00000270571.2	2.29654	-0.489878	0.000106373	0.00654234	0	0.11	0.42	0.14	Up	RP11-355F16.1	chr2	antisense
ENSG00000105270.14	2.25695	-0.677115	0.000336043	0.0137665	0.06	0.03	0.21	0.24	Up	CLIP3	chr19	protein_coding	CAP-GLY domain containing linker protein 3
ENSG00000255152.8	1.57822	0.0863604	0.00180587	0.0409813	0.15	0.07	0.42	0.27	Up	MSH5-SAPCD1	chr6	protein_coding	MSH5-SAPCD1 readthrough (NMD candidate)
ENSG00000138606.19	4.53545	-1.07277	4.92294e-06	0.000791728	0.01	0	0.14	0.17	Up	SHF	chr15	protein_coding	Src homology 2 domain containing F
ENSG00000259845.1	4.07016	-1.42524	3.59209e-05	0.0030755	0	0.02	0.17	0.23	Up	HERC2P10	chr15	unprocessed_pseudogene	hect domain and RLD 2 pseudogene 10
ENSG00000256667.6	3.69995	-0.229685	1.87001e-08	1.03511e-05	0	0.07	0.93	0.13	Up	KLRAP1	chr12	transcribed_unprocessed_pseudogene	killer cell lectin-like receptor subfamily A pseudogene 1
ENSG00000261556.8	1.88469	-0.640062	0.002417	0.0491705	0.09	0.05	0.43	0.12	Up	SMG1P7	chr16	transcribed_unprocessed_pseudogene	SMG1 pseudogene 7
ENSG00000180777.13	6.81811	-1.26369	2.37948e-07	7.86616e-05	0	0	0.27	0	Up	ANKRD30B	chr18	protein_coding	ankyrin repeat domain 30B
ENSG00000280095.1	5.76683	-2.01743	0.000362063	0.0137665	0	0	0.64	0.54	Up	CH507-42P11.7	chr21	lincRNA
ENSG00000259751.1	5.5677	-2.144	0.00109423	0.0289386	0	0	0.27	0.12	Up	RP11-83J16.3	chr15	processed_pseudogene
ENSG00000161298.16	2.51263	-0.489866	3.64123e-05	0.00309032	0.03	0	0.15	0.04	Up	ZNF382	chr19	protein_coding	zinc finger protein 382
ENSG00000229951.5	3.62905	-1.73496	0.000576632	0.0202135	0.02	0	0.15	0.09	Up	FLJ31356	chr2	antisense
ENSG00000035115.21	1.24278	1.39639	0.00219274	0.0453051	0.09	0.31	0.63	0.37	Up	SH3YL1	chr2	protein_coding	SH3 and SYLF domain containing 1
ENSG00000276744.1	6.10227	-1.79147	7.34591e-05	0.0048704	0	0	0.39	0.33	Up	CTD-2562G15.3	chr15	sense_intronic
ENSG00000260822.1	1.20016	2.08016	0.00197845	0.0417104	0.4	0.52	1.52	0.69	Up	GS1-358P8.4	chrX	sense_overlapping
ENSG00000260190.1	2.33434	-0.804814	0.000364854	0.0138065	0.06	0.28	0.74	1.07	Up	RP11-229P13.25	chr9	sense_overlapping
ENSG00000257264.3	5.36535	-0.393374	6.66687e-10	7.55642e-07	0.07	0	1.97	1.57	Up	MIR3179-1	chr16	lincRNA	microRNA 3179-1
ENSG00000162437.14	1.25662	2.72646	0.000803492	0.0245503	0.42	1.17	2.18	1.81	Up	RAVER2	chr1	protein_coding	ribonucleoprotein, PTB-binding 2
ENSG00000185946.15	1.16224	2.8834	0.00168265	0.0397325	0.79	1.31	3.03	1.88	Up	RNPC3	chr1	protein_coding	RNA-binding region (RNP1, RRM) containing 3
ENSG00000166257.8	5.856	-1.95872	0.000362063	0.0137665	0	0	0.04	0.05	Up	SCN3B	chr11	protein_coding	sodium channel, voltage gated, type III beta subunit
ENSG00000186469.8	6.10516	-1.78979	7.34591e-05	0.0048704	0	0	0.09	0.05	Up	GNG2	chr14	protein_coding	guanine nucleotide binding protein (G protein), gamma 2
ENSG00000279882.1	7.61352	-0.613395	9.27786e-11	1.22684e-07	0	0	4.99	0.6	Up	CTB-151G24.2	chr19	TEC
ENSG00000170647.3	1.46237	0.562578	0.00124024	0.0319483	0.46	0.21	1.44	0.52	Up	TMEM133	chr11	protein_coding	transmembrane protein 133
ENSG00000279208.1	1.24155	1.82923	0.00160976	0.0386245	1.06	3.8	6.44	5.61	Up	bP-21264C1.1	chr21	unprocessed_pseudogene
ENSG00000272977.1	1.81535	0.768759	5.783e-05	0.00427475	0.08	0.26	0.6	0.66	Up	CTA-390C10.10	chr22	sense_intronic
ENSG00000107036.11	1.23322	4.51774	0.000545605	0.0195285	1.36	2.05	4.48	3.93	Up	RIC1	chr9	protein_coding	RAB6A GEF complex partner 1
ENSG00000279900.1	2.82882	-1.22979	0.00063657	0.0206707	0	0.3	1.26	1.13	Up	RP11-113K21.6	chr11	TEC
ENSG00000267581.1	5.66364	-2.08328	0.000626635	0.0205161	0	0	0.25	0.6	Up	CTC-559E9.4	chr19	lincRNA
ENSG00000267002.1	1.88344	1.52677	6.3362e-06	0.000887143	0.8	1	4.09	2.88	Up	RP11-242D8.1	chr17	lincRNA
ENSG00000123901.8	6.2544	-1.68514	2.63878e-05	0.00237012	0	0	0.16	0.03	Up	GPR83	chr11	protein_coding	G protein-coupled receptor 83
ENSG00000100077.14	1.99211	0.241355	8.03036e-05	0.00519398	0.07	0.01	0.24	0.11	Up	ADRBK2	chr22	protein_coding	adrenergic, beta, receptor kinase 2
ENSG00000169629.11	1.51651	1.19573	0.000375388	0.0141153	0.18	0.14	0.56	0.42	Up	RGPD8	chr2	protein_coding	RANBP2-like and GRIP domain containing 8
ENSG00000226496.2	2.544	-0.652657	8.34676e-05	0.00535497	0	0.11	0.44	0.27	Up	LINC00323	chr21	antisense	long intergenic non-protein coding RNA 323
ENSG00000267898.1	4.13981	-1.37618	1.4835e-05	0.00165506	0	0.06	1.12	0.13	Up	CTD-2639E6.9	chr19	lincRNA
ENSG00000260597.1	2.25156	1.15345	5.12877e-07	0.000141133	0.29	0.2	1.26	1.21	Up	AC012531.25	chr12	lincRNA
ENSG00000260948.1	2.91287	-0.180368	1.80521e-06	0.000397849	0.04	0.11	0.83	0.45	Up	RP11-552M11.8	chr1	sense_overlapping
ENSG00000112414.14	1.2238	1.76478	0.00199151	0.0419487	0.13	0.38	1.01	0.24	Up	ADGRG6	chr6	protein_coding	adhesion G protein-coupled receptor G6
ENSG00000269246.1	5.77774	-2.01123	0.000362063	0.0137665	0	0	3.3	0	Up	CTC-246B18.10	chr19	lincRNA
ENSG00000265218.1	5.44739	-2.21703	0.00192837	0.0409813	0	0	0.13	0.26	Up	RP11-927P21.1	chr17	antisense
ENSG00000203709.9	2.48926	0.623596	3.77613e-07	0.000110962	0.01	0.04	0.18	0.12	Up	C1orf132	chr1	lincRNA	chromosome 1 open reading frame 132
ENSG00000268279.4	3.54895	-1.78832	0.00093262	0.0276786	0	0.07	0.52	0.5	Up	RP11-434D12.1	chr3	protein_coding
ENSG00000261220.2	1.6885	-0.322941	0.00194131	0.0411686	0.4	0.47	2.02	0.97	Up	RP11-629O1.2	chr8	lincRNA
ENSG00000280433.1	1.43367	0.588645	0.00191616	0.0409813	0.22	0.15	0.38	0.69	Up	CH507-9B2.9	chr21	protein_coding
ENSG00000270393.1	6.65802	-1.38516	1.45017e-06	0.000325632	0	0	0.74	0.46	Up	AC000095.9	chr22	processed_pseudogene
ENSG00000232530.1	5.454	-2.21335	0.00192837	0.0409813	0	0	0.38	0.18	Up	RP1-102K2.6	chr22	antisense
ENSG00000181690.7	1.44566	2.77688	0.000122501	0.00687972	0.36	0.54	1.7	0.86	Up	PLAG1	chr8	protein_coding	pleiomorphic adenoma gene 1
ENSG00000156042.17	1.39359	1.28039	0.000770748	0.0237634	0.38	0.23	1.13	0.57	Up	CFAP70	chr10	protein_coding	cilia and flagella associated protein 70
ENSG00000254876.5	1.41703	0.533309	0.00183509	0.0409813	0.39	0.03	0.55	0.62	Up	RP11-23J9.5	chr9	processed_transcript
ENSG00000244879.4	1.57492	3.69043	1.66225e-05	0.00171277	0.22	0.5	1.22	1.04	Up	GABPB1-AS1	chr15	antisense	GABPB1 antisense RNA 1
ENSG00000226789.1	5.5677	-2.144	0.00109423	0.0289386	0	0	0.12	0.05	Up	AC110926.4	chr2	processed_pseudogene
ENSG00000251194.2	5.76839	-2.01654	0.000362063	0.0137665	0	0	0.49	0.31	Up	RP1-68D18.2	chr11	sense_intronic
ENSG00000260495.1	5.86515	-1.95348	0.000211004	0.00971433	0	0	0.18	0.04	Up	RP11-55K13.1	chr16	antisense
ENSG00000172238.4	3.38904	-1.89221	0.00151609	0.0371254	0.02	0	0.22	0.05	Up	ATOH1	chr4	protein_coding	atonal homolog 1 (Drosophila)
ENSG00000125046.14	2.07101	-0.257632	0.000222189	0.0100358	0.17	0	0.46	0.31	Up	SSUH2	chr3	protein_coding	ssu-2 homolog (C. elegans)
ENSG00000276449.1	7.13525	-1.00916	1.86527e-08	1.03511e-05	0	0	0.3	0.14	Up	AC004076.5	chr19	antisense
ENSG00000214776.9	2.74645	0.832291	1.31016e-08	8.2064e-06	0.02	0.05	0.33	0.21	Up	RP11-726G1.1	chr12	transcribed_unprocessed_pseudogene
ENSG00000280332.1	2.47642	-0.702259	0.000149973	0.00793256	0	0.14	0.44	0.38	Up	CTD-2013N17.6	chr19	TEC
ENSG00000114857.17	1.39582	4.53699	9.73442e-05	0.00608133	0.89	2.13	5.48	2.84	Up	NKTR	chr3	protein_coding	natural killer cell triggering receptor
ENSG00000163009.8	1.29322	1.58711	0.00145334	0.0364515	0.96	0.65	2.47	1.67	Up	C2orf48	chr2	lincRNA	chromosome 2 open reading frame 48
ENSG00000272338.2	6.84985	-1.23669	2.37948e-07	7.86616e-05	0	0	1.32	0.76	Up	RP11-722E23.2	chr8	lincRNA
ENSG00000226562.3	3.1071	-1.02798	7.47575e-05	0.00492902	0.11	0.05	1.21	0.34	Up	CYP4F26P	chr9	lincRNA	cytochrome P450, family 4, subfamily F, polypeptide 26, pseudogene
ENSG00000101935.9	1.1547	4.25475	0.00125137	0.0321918	1.53	2.05	4.9	3.46	Up	AMMECR1	chrX	protein_coding	Alport syndrome, mental retardation, midface hypoplasia and elliptocytosis chromosomal region gene 1
ENSG00000127366.5	5.56608	-2.14491	0.00109423	0.0289386	0	0	0.26	0.16	Up	TAS2R5	chr7	protein_coding	taste receptor, type 2, member 5
ENSG00000222000.7	2.19466	-0.904585	0.000896986	0.0269912	0.15	0.15	1.06	0.45	Up	AC092675.3	chr2	antisense
ENSG00000279347.1	6.02911	-1.84249	0.000123998	0.00687972	0	0	0.28	0.13	Up	RP11-85I17.2	chr8	TEC
ENSG00000272758.5	2.83735	-1.22467	0.00063657	0.0206707	0	0.06	0.34	0.1	Up	RP11-299J3.8	chr3	antisense
ENSG00000232611.1	2.1439	-0.600589	0.000404188	0.0151504	0	0.12	0.38	0.19	Up	RP11-1114A5.4	chrX	lincRNA
ENSG00000147485.12	5.45731	-2.21151	0.00192837	0.0409813	0	0	0.08	0.02	Up	PXDNL	chr8	protein_coding	peroxidasin-like
ENSG00000197013.9	2.08526	0.145682	6.07349e-05	0.0044227	0.05	0.19	0.67	0.39	Up	ZNF429	chr19	protein_coding	zinc finger protein 429
ENSG00000253147.5	5.5677	-2.144	0.00109423	0.0289386	0	0	0.33	0.14	Up	RP11-369E15.4	chr8	lincRNA
ENSG00000268471.4	2.01089	0.0896456	7.63183e-05	0.00500421	0	0.23	0.56	0.41	Up	DKFZP434I0714	chr4	lincRNA
ENSG00000249437.7	1.93304	0.858471	2.31161e-05	0.00220968	0.12	0.08	0.5	0.27	Up	NAIP	chr5	protein_coding	NLR family, apoptosis inhibitory protein
ENSG00000011258.15	1.26901	3.87737	0.0004482	0.0165653	1.23	1.54	4.04	2.99	Up	MBTD1	chr17	protein_coding	mbt domain containing 1
ENSG00000167476.10	5.65889	-2.08597	0.000626635	0.0205161	0	0	0.03	0.42	Up	JSRP1	chr19	protein_coding	junctional sarcoplasmic reticulum protein 1
ENSG00000266896.1	5.57094	-2.14218	0.00109423	0.0289386	0	0	0.26	0.04	Up	RP1-266L20.9	chr6	sense_intronic
ENSG00000253910.2	5.94877	-1.89728	0.000211004	0.00971433	0	0	0.1	0.04	Up	PCDHGB2	chr5	protein_coding	protocadherin gamma subfamily B, 2
ENSG00000273033.2	1.57287	1.23571	0.000214896	0.00981087	0.18	0.19	0.75	0.42	Up	RP11-67L2.2	chr3	lincRNA
ENSG00000214076.3	5.93531	-1.90505	0.000211004	0.00971433	0	0	0.03	0.14	Up	CPSF1P1	chr22	processed_pseudogene	cleavage and polyadenylation specific factor 1, 160kDa pseudogene 1
ENSG00000233892.1	6.55487	-1.46382	2.31323e-06	0.000447638	0	0	0.57	0.24	Up	PAIP1P1	chr6	processed_pseudogene	poly(A) binding protein interacting protein 1 pseudogene 1
ENSG00000263307.1	5.45566	-2.21243	0.00192837	0.0409813	0	0	0.61	0.19	Up	RP11-166B2.8	chr16	antisense
ENSG00000163697.16	1.18232	3.78778	0.00106029	0.0289386	0.79	0.88	2.09	1.89	Up	APBB2	chr4	protein_coding	amyloid beta (A4) precursor protein-binding, family B, member 2
ENSG00000232018.4	5.66205	-2.08418	0.000626635	0.0205161	0	0	0.09	0.3	Up	AL132709.8	chr14	lincRNA
ENSG00000165895.17	1.20309	2.98091	0.00111992	0.0294544	0.55	0.94	1.6	1.99	Up	ARHGAP42	chr11	protein_coding	Rho GTPase activating protein 42
ENSG00000279789.1	1.47165	0.614407	0.0014912	0.0370111	0.35	0.27	0.97	0.85	Up	CTD-2574D22.3	chr16	TEC
ENSG00000273076.1	5.76683	-2.01743	0.000362063	0.0137665	0	0	0.73	0.61	Up	RP3-508I15.22	chr22	antisense
ENSG00000165269.12	6.31296	-1.642	1.59929e-05	0.00165506	0	0	0.13	0.09	Up	AQP7	chr9	protein_coding	aquaporin 7
ENSG00000204681.10	3.12873	0.450389	5.02801e-09	3.7399e-06	0.02	0.06	0.41	0.34	Up	GABBR1	chr6	protein_coding	gamma-aminobutyric acid (GABA) B receptor, 1
ENSG00000255318.1	5.75906	-2.02185	0.000626635	0.0205161	0	0	0.14	0.53	Up	RP11-655M14.13	chr11	lincRNA
ENSG00000279792.1	4.01373	-0.770328	8.95307e-07	0.00021558	0	0.04	0.18	0.56	Up	RP11-893F2.18	chr17	TEC
ENSG00000272760.1	5.85752	-1.95785	0.000362063	0.0137665	0	0	0.32	0.3	Up	RP11-5C23.1	chr7	antisense
ENSG00000214029.4	1.49397	2.90659	6.58526e-05	0.00472536	0.18	0.27	0.89	0.46	Up	ZNF891	chr12	protein_coding	zinc finger protein 891
ENSG00000249275.1	1.98533	-0.441571	0.00078282	0.0240732	0.17	0.39	1.97	0.4	Up	RP11-364P22.2	chr4	lincRNA
ENSG00000129194.7	6.1816	-1.73653	4.38607e-05	0.00338952	0	0	0.37	0.12	Up	SOX15	chr17	protein_coding	SRY (sex determining region Y)-box 15
ENSG00000253392.2	5.5677	-2.144	0.00109423	0.0289386	0	0	0.44	0.19	Up	AC006277.2	chr19	antisense
ENSG00000251349.3	1.24017	1.81388	0.00159518	0.0384296	0.96	0.82	2.83	1.59	Up	MSANTD3-TMEFF1	chr9	protein_coding	MSANTD3-TMEFF1 readthrough
ENSG00000280156.1	1.3315	0.93831	0.00208862	0.0436849	0.01	0.01	0.04	0.02	Up	AC006548.28	chr22	sense_overlapping
ENSG00000253352.8	1.43538	5.71646	5.13463e-05	0.00390461	3.66	5.24	14.98	10.24	Up	TUG1	chr22	antisense	taurine up-regulated 1 (non-protein coding)
ENSG00000260317.1	5.45897	-2.21059	0.00192837	0.0409813	0	0	0.23	0.02	Up	RP11-48B3.4	chr8	lincRNA
ENSG00000228742.9	3.20806	-1.38068	0.000666279	0.0210888	0.03	0	0.14	0.13	Up	RP5-884M6.1	chr7	lincRNA
ENSG00000105664.10	4.11934	-1.38825	2.30266e-05	0.00220968	0.02	0	0.11	0.26	Up	COMP	chr19	protein_coding	cartilage oligomeric matrix protein
ENSG00000215196.4	1.53246	1.11077	0.000320215	0.0134422	0.15	0.5	1	0.98	Up	AC091878.1	chr5	antisense
ENSG00000176681.14	2.96446	-1.1308	0.000215986	0.00981087	0.02	0	0.08	0.11	Up	LRRC37A	chr17	protein_coding	leucine rich repeat containing 37A
ENSG00000147059.8	3.26704	-1.33987	0.000450239	0.0165892	0	0.03	0.22	0.13	Up	SPIN2A	chrX	protein_coding	spindlin family, member 2A
ENSG00000267194.1	3.17063	-0.65278	4.5528e-06	0.000757803	0.07	0	0.56	0.16	Up	RP1-193H18.2	chr17	lincRNA
ENSG00000279544.1	5.45731	-2.21151	0.00192837	0.0409813	0	0	0.12	0.02	Up	AL133243.4	chr2	TEC
ENSG00000273018.5	1.23296	2.04316	0.00148667	0.0369756	0.18	0.74	1.62	0.66	Up	CTD-2303H24.2	chr17	processed_transcript
ENSG00000254608.1	5.57419	-2.14036	0.00109423	0.0289386	0	0	0.49	0	Up	RP11-56A10.1	chr8	unprocessed_pseudogene
ENSG00000101144.12	2.72491	-0.731602	6.07606e-05	0.0044227	0.01	0.04	0.17	0.22	Up	BMP7	chr20	protein_coding	bone morphogenetic protein 7
ENSG00000178809.11	1.74099	0.33101	0.000281103	0.012143	0.11	0.28	0.91	0.48	Up	TRIM73	chr7	protein_coding	tripartite motif containing 73
ENSG00000254665.1	6.55359	-1.4646	2.31323e-06	0.000447638	0	0	0.87	0.44	Up	RP11-152H18.3	chr11	antisense
ENSG00000249459.8	1.67479	0.925612	0.000144832	0.00772934	0.06	0.23	0.74	0.24	Up	ZNF286B	chr17	protein_coding	zinc finger protein 286B
ENSG00000280384.1	5.56608	-2.14491	0.00109423	0.0289386	0	0	0.15	0.09	Up	RP4-695O20.1	chr22	sense_intronic
ENSG00000260793.2	5.65731	-2.08686	0.000626635	0.0205161	0	0	0	0.25	Up	RP5-882C2.2	chr17	antisense
ENSG00000267100.1	1.19548	2.24927	0.00187424	0.0409813	1.21	1.38	3.09	3.15	Up	ILF3-AS1	chr19	lincRNA	ILF3 antisense RNA 1 (head to head)
ENSG00000234284.6	1.79021	0.0127765	0.000630959	0.0206292	0.1	0.12	0.58	0.22	Up	ZNF879	chr5	protein_coding	zinc finger protein 879
ENSG00000279198.1	2.21686	-0.0427525	3.71327e-05	0.00309032	0	0.18	0.58	0.29	Up	CTD-2231E14.2	chr19	TEC
ENSG00000272217.1	5.5677	-2.144	0.00109423	0.0289386	0	0	0.58	0.25	Up	XXbac-BPG157A10.21	chr6	lincRNA
ENSG00000268583.1	6.31433	-1.64119	1.59929e-05	0.00165506	0	0	0.94	0.52	Up	CTC-453G23.8	chr19	antisense
ENSG00000137270.10	2.82392	-0.25003	4.85161e-06	0.00079057	0.05	0.07	0.52	0.36	Up	GCM1	chr6	protein_coding	glial cells missing homolog 1 (Drosophila)
ENSG00000240038.6	1.57945	0.691199	0.000547775	0.0195768	0.39	0.2	1.14	0.73	Up	AMY2B	chr1	protein_coding	amylase, alpha 2B (pancreatic)
ENSG00000182397.14	3.63482	-1.73162	0.000576632	0.0202135	0.01	0	0.16	0.03	Up	DNM1P46	chr15	transcribed_unprocessed_pseudogene	dynamin 1 pseudogene 46
ENSG00000236008.1	1.5453	0.525738	0.000884826	0.0266928	0.09	0.05	0.28	0.15	Up	AC011747.4	chr2	lincRNA
ENSG00000232300.1	5.93382	-1.90591	0.000211004	0.00971433	0	0	0.03	0.25	Up	FAM215B	chr17	lincRNA	family with sequence similarity 215, member B (non-protein coding)
ENSG00000204531.15	1.43581	2.7401	0.000130629	0.00721399	0.83	1.41	3.26	3.1	Up	POU5F1	chr6	protein_coding	POU class 5 homeobox 1
ENSG00000245849.6	2.11197	0.25336	3.42176e-05	0.00297243	0.7	0.16	1.58	2.38	Up	RAD51-AS1	chr15	processed_transcript	RAD51 antisense RNA 1 (head to head)
ENSG00000279312.1	2.12061	1.41727	7.61595e-07	0.000197038	0.34	0.47	2.83	0.87	Up	RP3-331H24.7	chr6	TEC
ENSG00000241935.8	3.32227	-0.864453	1.33852e-05	0.00153338	0	0.05	0.29	0.32	Up	HOGA1	chr10	protein_coding	4-hydroxy-2-oxoglutarate aldolase 1
ENSG00000281332.1	1.90287	0.175131	0.000194187	0.00971433	0.22	0.07	0.69	0.47	Up	LINC00997	chr7	lincRNA	long intergenic non-protein coding RNA 997
ENSG00000272638.1	2.9787	-1.54132	0.00219032	0.0453051	0	0.12	0.87	0.25	Up	GS1-114I9.1	chr7	antisense
ENSG00000242748.1	5.67475	-2.07701	0.000626635	0.0205161	0	0	0.9	0.23	Up	RPL23AP81	chr20	transcribed_processed_pseudogene	ribosomal protein L23a pseudogene 81
ENSG00000267165.1	5.76372	-2.0192	0.000362063	0.0137665	0	0	0.41	0.59	Up	RP11-78A19.3	chr18	antisense
ENSG00000205771.6	1.61451	0.241341	0.000863294	0.0261094	0.11	0.22	0.51	0.55	Up	CATSPER2P1	chr15	transcribed_unprocessed_pseudogene	cation channel, sperm associated 2 pseudogene 1
ENSG00000235316.1	1.47139	0.423459	0.00170347	0.0401844	0.35	0.3	0.9	1.01	Up	DUSP8P5	chr10	processed_pseudogene	dual specificity phosphatase 8 pseudogene 5
ENSG00000279742.1	2.01073	-0.551322	0.00114653	0.0300218	0.11	0.06	0.54	0.2	Up	RP11-700A24.1	chr11	TEC
ENSG00000170049.9	2.26747	-0.853609	0.00066392	0.0210888	0	0.11	0.33	0.25	Up	KCNAB3	chr17	protein_coding	potassium channel, voltage gated subfamily A regulatory beta subunit 3
ENSG00000100625.8	1.3307	3.24902	0.000294003	0.0126315	0.87	0.68	2.33	1.76	Up	SIX4	chr14	protein_coding	SIX homeobox 4
ENSG00000273888.1	1.47413	0.31816	0.00215368	0.0448485	0.24	0.25	1.13	0.31	Up	FRMD6-AS1	chr14	antisense	FRMD6 antisense RNA 1
ENSG00000276997.4	1.87543	0.764646	4.02765e-05	0.00331717	0.15	0.68	1.35	1.89	Up	RP11-378J18.9	chr1	lincRNA
ENSG00000277151.1	5.45897	-2.21059	0.00192837	0.0409813	0	0	0.08	0.01	Up	RP11-380B4.3	chr13	lincRNA
ENSG00000252690.3	1.6197	0.364343	0.000857653	0.0259718	0.07	0.17	0.41	0.37	Up	SCARNA15	chr15	processed_transcript	small Cajal body-specific RNA 15
ENSG00000280088.1	4.80773	-0.858993	3.61669e-07	0.000110265	0.03	0	0.8	0.13	Up	RP11-135F9.3	chr12	TEC
ENSG00000241073.1	1.68892	-0.231042	0.00166435	0.0393786	0	1.66	3.96	1.71	Up	RP4-714D9.2	chr1	antisense
ENSG00000262333.1	1.74949	0.940737	7.59005e-05	0.00499056	0.33	1.24	3.39	2.18	Up	HNRNPA1P16	chr17	processed_pseudogene	heterogeneous nuclear ribonucleoprotein A1 pseudogene 16
ENSG00000279825.1	5.5677	-2.144	0.00109423	0.0289386	0	0	0.13	0.05	Up	CTC-457L16.1	chr17	TEC
ENSG00000182463.15	1.46886	2.21262	0.000143432	0.00770648	0.15	0.2	0.5	0.51	Up	TSHZ2	chr20	protein_coding	teashirt zinc finger homeobox 2
ENSG00000198711.5	6.29658	-1.65174	1.59929e-05	0.00165506	0	0	0.01	0.29	Up	SSBP3-AS1	chr1	antisense	SSBP3 antisense RNA 1
ENSG00000224411.3	2.08695	1.68398	5.15863e-07	0.000141133	0.37	0.6	2.76	1.6	Up	HSP90AA2P	chr11	processed_pseudogene	heat shock protein 90kDa alpha (cytosolic), class A member 2, pseudogene
ENSG00000105357.15	1.27233	1.16873	0.00233781	0.0477637	0.17	0.16	0.31	0.51	Up	MYH14	chr19	protein_coding	myosin, heavy chain 14, non-muscle
ENSG00000256453.1	1.77905	-0.164391	0.000734235	0.0229649	0.31	0.09	0.92	0.52	Up	DND1	chr5	protein_coding	DND microRNA-mediated repression inhibitor 1
ENSG00000273249.1	5.44079	-2.2207	0.00192837	0.0409813	0	0	0	0.53	Up	LL09NC01-251B2.3	chr9	antisense
ENSG00000233431.1	6.79329	-1.27917	3.70609e-07	0.000110265	0	0	0.46	0.93	Up	RP11-63N8.3	chr1	antisense
ENSG00000128886.11	1.8588	-0.105994	0.000398579	0.0149637	0.25	0.02	0.47	0.57	Up	ELL3	chr15	protein_coding	elongation factor RNA polymerase II-like 3
ENSG00000226472.7	6.10949	-1.78726	7.34591e-05	0.0048704	0	0	0.34	0.09	Up	RP11-551L14.4	chr12	antisense
ENSG00000142609.17	6.03058	-1.84163	0.000123998	0.00687972	0	0	0.09	0.03	Up	CFAP74	chr1	protein_coding	cilia and flagella associated protein 74
ENSG00000261270.1	2.32736	-0.809393	0.000364854	0.0138065	0	0.46	0.57	1.88	Up	RP11-325K4.3	chr16	sense_intronic
ENSG00000234546.2	2.13636	-0.943839	0.0016415	0.0390208	0.09	0.19	0.31	1	Up	RP3-510D11.2	chr1	lincRNA
ENSG00000213860.4	5.44409	-2.21887	0.00192837	0.0409813	0	0	0.16	0.76	Up	RPL21P75	chr7	processed_pseudogene	ribosomal protein L21 pseudogene 75
ENSG00000274191.1	1.96852	-0.881707	0.00247683	0.0496672	0	0.59	0.98	1.48	Up	RP11-324E6.10	chr12	lincRNA
ENSG00000239665.8	2.33396	-0.316058	7.76137e-05	0.00507517	0.02	0.15	0.58	0.36	Up	RP11-295P9.3	chr10	processed_transcript
ENSG00000267702.1	7.12998	-1.01257	1.86527e-08	1.03511e-05	0	0	0.19	0.16	Up	RP11-53B2.2	chr18	sense_intronic
ENSG00000240399.1	6.66421	-1.38136	9.1478e-07	0.00021558	0	0	1.07	0.28	Up	RP1-228P16.1	chr12	transcribed_processed_pseudogene
ENSG00000263327.6	6.43558	-1.55209	6.0008e-06	0.000855275	0	0	0.2	0.16	Up	TAPT1-AS1	chr4	antisense	TAPT1 antisense RNA 1 (head to head)
ENSG00000252699.1	5.856	-1.95872	0.000362063	0.0137665	0	0	1.96	2.42	Up	SNORA21	chr17	snoRNA	small nucleolar RNA, H/ACA box 21
ENSG00000125910.5	5.57257	-2.14127	0.00109423	0.0289386	0	0	0.29	0.02	Up	S1PR4	chr19	protein_coding	sphingosine-1-phosphate receptor 4
ENSG00000262691.1	4.69859	-0.205999	4.06034e-10	4.83221e-07	0.02	0.02	0.72	0.3	Up	CTC-277H1.7	chr16	processed_transcript
ENSG00000236432.7	6.10949	-1.78726	7.34591e-05	0.0048704	0	0	0.17	0.04	Up	AC097662.2	chr2	antisense
ENSG00000278998.1	5.46063	-2.20966	0.00192837	0.0409813	0	0	0.48	0	Up	RP11-1430O6.1	chr7	TEC
ENSG00000158473.6	5.45566	-2.21243	0.00192837	0.0409813	0	0	0.15	0.05	Up	CD1D	chr1	protein_coding	CD1d molecule
ENSG00000142583.17	1.37235	1.46541	0.000742414	0.0231128	0.2	0.27	0.51	0.76	Up	SLC2A5	chr1	protein_coding	solute carrier family 2 (facilitated glucose/fructose transporter), member 5
ENSG00000006283.17	1.68046	0.160741	0.000771793	0.0237648	0.1	0	0.14	0.19	Up	CACNA1G	chr17	protein_coding	calcium channel, voltage-dependent, T type, alpha 1G subunit
ENSG00000278047.1	9.44556	1.04144	8.90089e-22	5.29647e-18	0	0	0.41	78.98	Up	FP671120.6	chr21	miRNA
ENSG00000175265.17	1.29884	5.83358	0.000234036	0.0104122	6.81	5.65	21.04	11.13	Up	GOLGA8A	chr15	protein_coding	golgin A8 family, member A
ENSG00000258904.1	5.44244	-2.21978	0.00192837	0.0409813	0	0	0.07	0.75	Up	RP11-638I2.2	chr14	sense_intronic
ENSG00000141338.13	5.95627	-1.89296	0.000123998	0.00687972	0	0	0.11	0	Up	ABCA8	chr17	protein_coding	ATP-binding cassette, sub-family A (ABC1), member 8
ENSG00000269378.1	4.41862	-1.16488	1.07237e-05	0.00130316	0	0.07	1.31	0.72	Up	ITGB1P1	chr19	processed_pseudogene	integrin beta 1 pseudogene 1
ENSG00000226091.7	5.56608	-2.14491	0.00109423	0.0289386	0	0	0.06	0.04	Up	LINC00937	chr12	lincRNA	long intergenic non-protein coding RNA 937
ENSG00000177791.11	3.15992	-1.41616	0.000666279	0.0210888	0	0.06	0.44	0.17	Up	MYOZ1	chr10	protein_coding	myozenin 1
ENSG00000127081.13	1.17083	2.27931	0.00217804	0.045237	0.38	0.94	2.01	1.11	Up	ZNF484	chr9	protein_coding	zinc finger protein 484
ENSG00000257242.6	5.85447	-1.9596	0.000362063	0.0137665	0	0	0.11	0.17	Up	C12orf79	chr12	protein_coding	chromosome 12 open reading frame 79
ENSG00000226318.1	6.03794	-1.83737	7.34591e-05	0.0048704	0	0	0.9	0	Up	RP11-474D14.2	chr10	processed_pseudogene
ENSG00000229180.5	1.19711	2.85283	0.00132368	0.0337688	0.56	0.5	1.45	1.1	Up	GS1-124K5.11	chr7	lincRNA
ENSG00000261839.1	5.85905	-1.95697	0.000362063	0.0137665	0	0	0.12	0.09	Up	RP1-265C24.8	chr6	lincRNA
ENSG00000129749.3	1.77773	0.420866	0.000241822	0.0106788	0.29	0.2	1.08	0.73	Up	CHRNA10	chr11	protein_coding	cholinergic receptor, nicotinic, alpha 10 (neuronal)
ENSG00000168062.9	2.62457	-1.06138	0.000421722	0.0156841	0	0.08	0.29	0.23	Up	BATF2	chr11	protein_coding	basic leucine zipper transcription factor, ATF-like 2
ENSG00000053524.11	1.7538	0.139399	0.00051177	0.0185972	0.06	0.07	0.3	0.16	Up	MCF2L2	chr3	protein_coding	MCF.2 cell line derived transforming sequence-like 2
ENSG00000278916.1	1.8493	-0.666062	0.00173136	0.0405608	0	0.17	0.44	0.19	Up	CEP83-AS1	chr12	lincRNA	CEP83 antisense RNA 1 (head to head)
ENSG00000258559.2	1.90178	-0.627318	0.002417	0.0491705	0.13	0.17	0.47	0.72	Up	AC005519.4	chr14	sense_overlapping
ENSG00000269982.1	4.62555	-0.266339	9.45252e-10	9.4619e-07	0.01	0.01	0.32	0.36	Up	RP11-1020A11.2	chr3	antisense
ENSG00000135378.3	1.81594	1.92482	5.91847e-06	0.000855275	0.21	0.32	0.96	1.02	Up	PRRG4	chr11	protein_coding	proline rich Gla (G-carboxyglutamic acid) 4 (transmembrane)
ENSG00000230366.9	2.73992	-1.29312	0.000916329	0.0273314	0.05	0.02	0.5	0.04	Up	DSCR9	chr21	lincRNA	Down syndrome critical region 9 (non-protein coding)
ENSG00000278396.1	6.94777	-1.16119	9.97305e-08	3.89145e-05	0	0	2.23	0.21	Up	RP11-120E11.2	chr14	sense_intronic
ENSG00000237399.7	5.94129	-1.9016	0.000211004	0.00971433	0	0	0.07	0.09	Up	PITRM1-AS1	chr10	antisense	PITRM1 antisense RNA 1
ENSG00000187753.12	3.14081	-1.00263	7.47575e-05	0.00492902	0	0.07	0.41	0.28	Up	C9orf153	chr9	protein_coding	chromosome 9 open reading frame 153
ENSG00000188199.10	5.86515	-1.95348	0.000211004	0.00971433	0	0	0.1	0.02	Up	NUTM2B	chr10	protein_coding	NUT family member 2B
ENSG00000184313.19	5.67316	-2.0779	0.000626635	0.0205161	0	0	0.08	0.03	Up	MROH7	chr1	protein_coding	maestro heat-like repeat family member 7
ENSG00000265962.1	5.57094	-2.14218	0.00109423	0.0289386	0	0	0.51	0.09	Up	GACAT2	chr18	antisense	gastric cancer associated transcript 2 (non-protein coding)
ENSG00000232233.1	1.33753	1.03879	0.00162427	0.0388551	0.59	0.5	1.43	1.47	Up	RP11-573D15.2	chr3	lincRNA
ENSG00000233215.5	6.18443	-1.73487	4.38607e-05	0.00338952	0	0	0.44	0.07	Up	AP000472.2	chr21	lincRNA
ENSG00000198466.11	1.12465	4.75025	0.00154122	0.0376384	2.13	2.25	5.21	4.82	Up	ZNF587	chr19	protein_coding	zinc finger protein 587
ENSG00000178567.7	1.10772	3.97746	0.00204358	0.0427804	0.8	1.43	3.22	1.81	Up	EPM2AIP1	chr3	protein_coding	EPM2A (laforin) interacting protein 1
ENSG00000280120.1	1.90932	1.06257	1.37038e-05	0.00156067	0.73	0.69	3.32	2.32	Up	RP11-546D6.3	chr12	TEC
ENSG00000205853.10	5.76839	-2.01654	0.000362063	0.0137665	0	0	0.23	0.15	Up	RFPL3S	chr22	protein_coding	RFPL3 antisense
ENSG00000183929.7	1.43767	0.796387	0.00118665	0.0308011	0.56	0.84	2.71	1.28	Up	DUSP5P1	chr1	processed_pseudogene	dual specificity phosphatase 5 pseudogene 1
ENSG00000198105.11	1.18252	2.86638	0.00146984	0.0367004	0.61	0.72	1.83	1.32	Up	ZNF248	chr10	protein_coding	zinc finger protein 248
ENSG00000256612.7	1.81923	-0.441869	0.00171887	0.0404273	0	0.13	0.38	0.13	Up	CYP2B7P	chr19	transcribed_unprocessed_pseudogene	cytochrome P450, family 2, subfamily B, polypeptide 7, pseudogene
ENSG00000261254.2	2.5394	-0.305745	2.94512e-05	0.00261566	0	0.07	0.2	0.24	Up	RP4-714D9.5	chr1	sense_overlapping
ENSG00000153294.11	2.28811	0.0158674	1.97731e-05	0.00197748	0.11	0.05	0.19	0.65	Up	ADGRF4	chr6	protein_coding	adhesion G protein-coupled receptor F4
ENSG00000239719.1	6.37425	-1.59711	9.76248e-06	0.00121658	0	0	2.52	2.22	Up	RP4-800G7.1	chr7	processed_pseudogene
ENSG00000266241.1	1.64916	1.05908	0.000157845	0.00825721	5.89	11.4	38.81	18.26	Up	MIR5047	chr17	miRNA	microRNA 5047
ENSG00000260070.1	5.6684	-2.08059	0.000626635	0.0205161	0	0	0.38	0.36	Up	RP11-182J23.1	chr7	antisense
ENSG00000165591.6	6.18869	-1.73237	2.63878e-05	0.00237012	0	0	0.38	0	Up	FAAH2	chrX	protein_coding	fatty acid amide hydrolase 2
ENSG00000251173.1	3.69876	-1.68782	0.000358374	0.0137665	0	0.05	0.43	0.41	Up	UCHL1-AS1	chr4	antisense	UCHL1 antisense RNA 1 (head to head)
ENSG00000196177.12	1.457	0.645421	0.0015288	0.0373982	0.04	0.2	0.41	0.28	Up	ACADSB	chr10	protein_coding	acyl-CoA dehydrogenase, short/branched chain
ENSG00000177842.11	6.92855	-1.17334	9.97305e-08	3.89145e-05	0	0	0.16	0.22	Up	ZNF620	chr3	protein_coding	zinc finger protein 620
ENSG00000236013.5	5.67952	-2.07431	0.000626635	0.0205161	0	0	0.26	0	Up	RP3-332B22.1	chr6	lincRNA
ENSG00000166473.16	3.03112	0.811203	1.70579e-09	1.47873e-06	0.02	0.03	0.28	0.19	Up	PKD1L2	chr16	polymorphic_pseudogene	polycystic kidney disease 1-like 2 (gene/pseudogene)
ENSG00000173867.8	5.94129	-1.9016	0.000211004	0.00971433	0	0	0.4	0.54	Up	RP11-97O12.7	chr15	processed_transcript
ENSG00000236307.2	3.70159	-1.68617	0.000358374	0.0137665	0	0.11	1.06	0.68	Up	EEF1E1P1	chr2	processed_pseudogene	eukaryotic translation elongation factor 1 epsilon 1 pseudogene 1
ENSG00000165121.10	1.84151	-0.214357	0.000672851	0.0212403	0.27	0.08	0.99	0.37	Up	RP11-213G2.3	chr9	unprocessed_pseudogene
ENSG00000167995.15	2.58071	-0.273175	1.80047e-05	0.00182198	0.01	0.06	0.16	0.29	Up	BEST1	chr11	protein_coding	bestrophin 1
ENSG00000237977.1	7.73429	-0.509155	1.67071e-11	3.61512e-08	0	0	2.97	0.97	Up	EIF4HP2	chr22	processed_pseudogene	eukaryotic translation initiation factor 4H pseudogene 2
ENSG00000176771.15	1.79591	1.0567	3.63065e-05	0.00309032	0.09	0.12	0.43	0.34	Up	NCKAP5	chr2	protein_coding	NCK-associated protein 5
ENSG00000279557.1	5.94428	-1.89987	0.000211004	0.00971433	0	0	0.29	0.25	Up	CTD-2210P15.3	chr5	TEC
ENSG00000154997.8	6.10516	-1.78979	7.34591e-05	0.0048704	0	0	0.12	0.07	Up	SEPT14	chr7	protein_coding	septin 14
ENSG00000183396.3	5.454	-2.21335	0.00192837	0.0409813	0	0	0.46	0.22	Up	TMEM89	chr3	protein_coding	transmembrane protein 89
ENSG00000236901.4	1.37716	2.64868	0.00026579	0.0115444	0.54	0.5	1.61	1.23	Up	MIR600HG	chr9	sense_intronic	MIR600 host gene
ENSG00000196876.13	5.57094	-2.14218	0.00109423	0.0289386	0	0	0.04	0.01	Up	SCN8A	chr12	protein_coding	sodium channel, voltage gated, type VIII alpha subunit
ENSG00000197776.7	6.02911	-1.84249	0.000123998	0.00687972	0	0	0.17	0.08	Up	KLHDC1	chr14	protein_coding	kelch domain containing 1
ENSG00000169914.5	1.19326	3.82378	0.000959006	0.0283556	0.93	1.5	3.2	2.65	Up	OTUD3	chr1	protein_coding	OTU deubiquitinase 3
ENSG00000270605.1	2.94406	-0.565854	7.41314e-06	0.00100827	0	0.12	0.59	0.39	Up	RP5-1092A3.4	chr1	antisense
ENSG00000280381.1	6.55103	-1.46615	2.31323e-06	0.000447638	0	0	0.1	0.07	Up	RP11-197N18.8	chr12	TEC
ENSG00000196873.15	2.55998	0.423475	6.29554e-07	0.000168367	0.05	0.13	0.88	0.29	Up	CBWD3	chr9	protein_coding	COBW domain containing 3
ENSG00000259462.2	5.44079	-2.2207	0.00192837	0.0409813	0	0	0	0.09	Up	CPEB1-AS1	chr15	antisense	CPEB1 antisense RNA 1
ENSG00000255559.1	6.17593	-1.73986	4.38607e-05	0.00338952	0	0	0.13	0.1	Up	ZNF252P-AS1	chr8	antisense	ZNF252P antisense RNA 1
ENSG00000104941.7	5.57419	-2.14036	0.00109423	0.0289386	0	0	0.19	0	Up	RSPH6A	chr19	protein_coding	radial spoke head 6 homolog A (Chlamydomonas)
ENSG00000102001.12	5.46063	-2.20966	0.00192837	0.0409813	0	0	0.07	0	Up	CACNA1F	chrX	protein_coding	calcium channel, voltage-dependent, L type, alpha 1F subunit
ENSG00000239713.7	5.85295	-1.96047	0.000362063	0.0137665	0	0	0.1	0.22	Up	APOBEC3G	chr22	protein_coding	apolipoprotein B mRNA editing enzyme, catalytic polypeptide-like 3G
ENSG00000188933.14	1.45397	1.02283	0.00075956	0.0235173	0.19	0.22	0.85	0.33	Up	USP32P1	chr17	transcribed_unprocessed_pseudogene	ubiquitin specific peptidase 32 pseudogene 1
ENSG00000127311.9	1.12365	2.91181	0.00236513	0.0482803	0.28	0.38	0.77	0.75	Up	HELB	chr12	protein_coding	helicase (DNA) B
ENSG00000073734.8	5.77774	-2.01123	0.000362063	0.0137665	0	0	0.12	0	Up	ABCB11	chr2	protein_coding	ATP-binding cassette, sub-family B (MDR/TAP), member 11
ENSG00000273014.1	4.19682	-0.15742	1.18334e-09	1.12663e-06	0	0.29	3.71	2.24	Up	RP11-225B17.2	chr7	lincRNA
ENSG00000272010.1	5.86821	-1.95173	0.000211004	0.00971433	0	0	0.92	0.06	Up	CTD-3025N20.3	chr8	lincRNA
ENSG00000238009.6	1.47224	0.57012	0.00124024	0.0319483	0.3	0.1	0.78	0.39	Up	RP11-34P13.7	chr1	lincRNA
ENSG00000117425.13	3.09551	-1.03576	0.000106226	0.00654234	0	0.03	0.12	0.14	Up	PTCH2	chr1	protein_coding	patched 2
ENSG00000274292.1	6.09075	-1.7982	7.34591e-05	0.0048704	0	0	0.03	0.24	Up	RP11-347I19.7	chr12	lincRNA
ENSG00000137145.20	1.18692	3.57857	0.00105841	0.0289386	0.56	1.33	2.46	2.05	Up	DENND4C	chr9	protein_coding	DENN/MADD domain containing 4C
ENSG00000103740.9	5.95327	-1.89469	0.000123998	0.00687972	0	0	0.08	0.01	Up	ACSBG1	chr15	protein_coding	acyl-CoA synthetase bubblegum family member 1
ENSG00000115137.11	1.32657	1.28365	0.00160146	0.038464	0.12	0.37	0.72	0.55	Up	DNAJC27	chr2	protein_coding	DnaJ (Hsp40) homolog, subfamily C, member 27
ENSG00000055118.14	3.46105	-1.84528	0.00151609	0.0371254	0	0.01	0.03	0.09	Up	KCNH2	chr7	protein_coding	potassium channel, voltage gated eag related subfamily H, member 2
ENSG00000245532.5	1.41507	8.83704	5.73758e-05	0.00425563	11.27	8.68	33.87	22.02	Up	NEAT1	chr11	lincRNA	nuclear paraspeckle assembly transcript 1 (non-protein coding)
ENSG00000235703.5	4.84502	-0.0799676	6.07642e-11	9.64206e-08	0	0.02	0.43	0.24	Up	LINC00894	chrX	antisense	long intergenic non-protein coding RNA 894
ENSG00000251562.7	1.39152	7.02073	7.83779e-05	0.0051111	7.96	6.95	24.21	16.86	Up	MALAT1	chr11	lincRNA	metastasis associated lung adenocarcinoma transcript 1 (non-protein coding)
ENSG00000257225.1	6.66421	-1.38136	9.1478e-07	0.00021558	0	0	0.3	0.08	Up	RP11-328C8.4	chr12	antisense
ENSG00000279696.1	1.50022	0.839516	0.000671597	0.0212289	0.09	0.42	0.81	0.7	Up	RP11-178H8.7	chr11	TEC
ENSG00000176401.5	1.40975	0.779282	0.00149044	0.0370111	0.56	0.29	1.06	1.33	Up	EID2B	chr19	protein_coding	EP300 interacting inhibitor of differentiation 2B
ENSG00000014257.15	1.54666	1.2499	0.000246212	0.0108324	0.44	0.12	0.64	1.09	Up	ACPP	chr3	protein_coding	acid phosphatase, prostate
ENSG00000260000.2	2.58054	-0.837468	0.000153665	0.00807402	0.06	0.09	0.25	0.72	Up	RP3-467N11.1	chr6	antisense
ENSG00000266265.2	5.55798	-2.14945	0.00109423	0.0289386	0	0	0.04	0.13	Up	KLF14	chr7	protein_coding	Kruppel-like factor 14
ENSG00000186026.6	1.79842	1.36995	1.69812e-05	0.00172729	0.1	0.36	0.94	0.74	Up	ZNF284	chr19	protein_coding	zinc finger protein 284
ENSG00000215252.11	1.61196	3.78559	1.0731e-05	0.00130316	1.43	1.24	5.13	3.45	Up	GOLGA8B	chr15	protein_coding	golgin A8 family, member B
ENSG00000081059.19	1.82991	-0.125923	0.000488431	0.0178307	0.15	0	0.18	0.4	Up	TCF7	chr5	protein_coding	transcription factor 7 (T-cell specific, HMG-box)
ENSG00000173597.8	2.18283	0.0352472	2.99019e-05	0.00264582	0.04	0.04	0.29	0.11	Up	SULT1B1	chr4	protein_coding	sulfotransferase family, cytosolic, 1B, member 1
ENSG00000271971.1	4.33763	-1.22806	4.08511e-06	0.000694528	0	0.06	1.4	0.2	Up	CTD-2006H14.2	chr8	antisense
ENSG00000198691.11	5.55798	-2.14945	0.00109423	0.0289386	0	0	0.02	0.05	Up	ABCA4	chr1	protein_coding	ATP-binding cassette, sub-family A (ABC1), member 4
ENSG00000134121.9	5.44739	-2.21703	0.00192837	0.0409813	0	0	0.02	0.04	Up	CHL1	chr3	protein_coding	cell adhesion molecule L1-like
ENSG00000254632.1	3.46817	-1.84089	0.00151609	0.0371254	0.08	0	0.64	0.54	Up	RP11-21L23.4	chr11	antisense
ENSG00000261584.1	2.11923	-0.9571	0.0016415	0.0390208	0.13	0.03	0.66	0.08	Up	RP11-457M11.5	chr6	lincRNA
ENSG00000162994.15	1.67551	0.846018	0.000180634	0.00938744	0.24	0.35	1.18	0.8	Up	CLHC1	chr2	protein_coding	clathrin heavy chain linker domain containing 1
ENSG00000081052.11	1.18369	4.05916	0.00097137	0.02865	0.82	1.04	2.27	2.18	Up	COL4A4	chr2	protein_coding	collagen, type IV, alpha 4
ENSG00000272870.1	1.49103	0.434306	0.00148186	0.0368945	0.02	0.46	0.7	0.7	Up	RP11-798M19.6	chr4	antisense
ENSG00000114120.11	1.13253	5.94306	0.00127322	0.0326563	4.19	5.02	12.35	8.82	Up	SLC25A36	chr3	protein_coding	solute carrier family 25 (pyrimidine nucleotide carrier), member 36
ENSG00000210154.1	5.45731	-2.21151	0.00192837	0.0409813	0	0	5.6	1.07	Up	MT-TD	chrM	Mt_tRNA	mitochondrially encoded tRNA aspartic acid
ENSG00000139656.6	6.10227	-1.79147	7.34591e-05	0.0048704	0	0	0.46	0.4	Up	SMIM2	chr13	protein_coding	small integral membrane protein 2
ENSG00000226147.1	5.94129	-1.9016	0.000211004	0.00971433	0	0	0.2	0.28	Up	TUBBP10	chr1	processed_pseudogene	tubulin, beta class I pseudogene 10
ENSG00000112852.6	3.0213	-0.503674	4.13156e-06	0.000697442	0.05	0	0.26	0.23	Up	PCDHB2	chr5	protein_coding	protocadherin beta 2
ENSG00000129480.12	1.55318	2.22735	6.43881e-05	0.00464414	0.37	1.19	3.14	1.65	Up	DTD2	chr14	protein_coding	D-tyrosyl-tRNA deacylase 2 (putative)
ENSG00000172005.10	5.56284	-2.14672	0.00109423	0.0289386	0	0	0.21	0.23	Up	MAL	chr2	protein_coding	mal, T-cell differentiation protein
ENSG00000227671.4	1.79458	2.9042	2.10677e-06	0.000447638	1.4	2.1	8.11	4.65	Up	RP11-488L18.4	chr1	transcribed_unprocessed_pseudogene
ENSG00000164684.13	1.17716	3.49264	0.00122478	0.0316528	0.4	0.47	1.23	0.82	Up	ZNF704	chr8	protein_coding	zinc finger protein 704
ENSG00000152779.13	6.97956	-1.13432	6.50861e-08	2.86885e-05	0	0	0.19	0.09	Up	SLC16A12	chr10	protein_coding	solute carrier family 16, member 12
ENSG00000278989.1	1.88467	-0.287156	0.000760789	0.0235173	0	0.23	0.68	0.23	Up	RP11-762L8.6	chr11	TEC
ENSG00000171560.14	7.03727	-1.08457	4.26969e-08	2.03254e-05	0	0	0.04	0.3	Up	FGA	chr4	protein_coding	fibrinogen alpha chain
ENSG00000213062.4	3.48556	-0.737093	3.53569e-06	0.000623381	0.05	0.1	0.84	1.04	Up	RP1-206D15.6	chr1	lincRNA
ENSG00000144802.11	1.23517	3.45822	0.000701623	0.0220027	1.34	1.48	4.43	2.54	Up	NFKBIZ	chr3	protein_coding	nuclear factor of kappa light polypeptide gene enhancer in B-cells inhibitor, zeta
ENSG00000242220.6	1.44434	0.453865	0.00200416	0.0421032	0.15	0.3	0.51	0.8	Up	TCP10L	chr21	protein_coding	t-complex 10-like
ENSG00000272148.1	5.94877	-1.89728	0.000211004	0.00971433	0	0	0.95	0.38	Up	RP11-195B17.1	chr2	antisense
ENSG00000272077.1	2.27389	-0.8497	0.00066392	0.0210888	0	0.14	0.53	0.21	Up	RP11-348P10.2	chr3	lincRNA
ENSG00000228274.3	4.00795	-1.46931	5.63203e-05	0.00420231	0.02	0	0.09	0.26	Up	RP3-508I15.9	chr22	antisense
ENSG00000260368.1	2.97827	-1.12333	0.000215986	0.00981087	0	0.12	0.8	0.26	Up	RP11-521I2.3	chr8	sense_overlapping
ENSG00000196972.7	3.20167	-1.38448	0.000666279	0.0210888	0.03	0	0.11	0.24	Up	SMIM10L2B	chrX	protein_coding	small integral membrane protein 10 like 2B
ENSG00000186020.12	1.38209	3.14367	0.000183871	0.00949015	0.58	1.11	2.8	1.8	Up	ZNF529	chr19	protein_coding	zinc finger protein 529
ENSG00000275393.1	6.44616	-1.54573	6.0008e-06	0.000855275	0	0	1.5	0.21	Up	RP11-568J23.8	chr16	sense_intronic
ENSG00000272505.1	5.44574	-2.21795	0.00192837	0.0409813	0	0	0.04	0.11	Up	RP11-981G7.6	chr8	lincRNA
ENSG00000276445.1	3.14044	-1.42771	0.000988446	0.0289386	0	0.16	0.2	1.38	Up	LLNLR-268E12.1	chr19	lincRNA
ENSG00000233175.2	1.99081	-0.562795	0.00114653	0.0300218	0.2	0	0.27	0.6	Up	CTD-2020K17.3	chr17	antisense
ENSG00000272058.2	1.7317	-0.199834	0.001105	0.0291266	0.04	0.15	0.39	0.27	Up	FAM231D	chr1	protein_coding	family with sequence similarity 231, member D
ENSG00000174236.3	2.60496	0.0258164	2.61608e-06	0.000486468	0.21	0.21	1.73	1.02	Up	REP15	chr12	protein_coding	RAB15 effector protein
ENSG00000204642.13	3.46817	-1.84089	0.00151609	0.0371254	0.02	0	0.17	0.15	Up	HLA-F	chr6	protein_coding	major histocompatibility complex, class I, F
ENSG00000242094.1	5.46063	-2.20966	0.00192837	0.0409813	0	0	0.13	0	Up	FOXP1-IT1	chr3	sense_intronic	FOXP1 intronic transcript 1
ENSG00000169330.8	1.38164	1.00652	0.00128628	0.0329558	0.19	0.09	0.49	0.29	Up	KIAA1024	chr15	protein_coding	KIAA1024
ENSG00000138669.9	2.53756	-1.12344	0.000830003	0.0251665	0	0.04	0.15	0.09	Up	PRKG2	chr4	protein_coding	protein kinase, cGMP-dependent, type II
ENSG00000116668.12	1.48324	0.573964	0.00108846	0.0289386	0.01	0.33	0.55	0.45	Up	SWT1	chr1	protein_coding	SWT1 RNA endoribonuclease homolog (S. cerevisiae)
ENSG00000276924.1	7.11931	1.18925	7.41851e-22	5.29647e-18	0	0.5	0	88.1	Up	FP236383.9	chr21	miRNA
ENSG00000261716.1	1.32128	2.12032	0.000633771	0.0206707	0.28	0.69	1.55	1.01	Up	RP11-196G18.22	chr1	sense_overlapping
ENSG00000280424.1	2.31917	-0.631157	0.000191423	0.00971433	0.08	0	0.18	0.23	Up	CITF22-92A6.2	chr22	TEC
ENSG00000080947.14	2.87214	0.937414	2.33271e-09	1.9146e-06	0.06	0.08	0.57	0.5	Up	CROCCP3	chr1	transcribed_unprocessed_pseudogene	ciliary rootlet coiled-coil, rootletin pseudogene 3
ENSG00000259518.1	2.85231	-0.41705	4.88252e-06	0.00079057	0.05	0.05	0.53	0.3	Up	LINC01583	chr15	lincRNA	long intergenic non-protein coding RNA 1583
ENSG00000139946.9	1.34895	2.40514	0.000409531	0.0152785	0.41	0.49	1.49	0.92	Up	PELI2	chr14	protein_coding	pellino E3 ubiquitin protein ligase family member 2
ENSG00000185065.6	2.25307	0.186926	2.01084e-05	0.00200259	0.22	0.09	0.6	0.94	Up	AC000068.5	chr22	antisense
ENSG00000243302.3	1.54874	2.43824	5.41491e-05	0.00410464	2.6	1.67	7.05	6.1	Up	RP11-274B21.2	chr7	processed_pseudogene
ENSG00000280287.1	1.53631	0.658822	0.000797073	0.0243855	0.11	0.22	0.49	0.5	Up	RP13-554M15.7	chr12	TEC
ENSG00000230061.2	1.38674	0.507917	0.00238282	0.0485581	0.16	0.42	1.01	0.57	Up	TRPM2-AS	chr21	antisense	TRPM2 antisense RNA
ENSG00000280145.3	1.6229	2.10502	3.68354e-05	0.00309032	0.29	0.23	1.32	0.39	Up	CH507-154B10.1	chr21	lincRNA
ENSG00000213397.10	2.98176	-1.1212	0.000215986	0.00981087	0	0.05	0.41	0.07	Up	HAUS7	chrX	protein_coding	HAUS augmin-like complex, subunit 7
ENSG00000179698.13	2.1868	-0.910205	0.00121296	0.0314154	0	0.04	0.09	0.1	Up	KIAA1875	chr8	protein_coding	KIAA1875
ENSG00000066777.8	1.1648	4.59374	0.00107223	0.0289386	1.57	2.18	5.24	3.57	Up	ARFGEF1	chr8	protein_coding	ADP-ribosylation factor guanine nucleotide-exchange factor 1 (brefeldin A-inhibited)
ENSG00000135437.9	3.38329	-1.8958	0.00247689	0.0496672	0	0.03	0.26	0.2	Up	RDH5	chr12	protein_coding	retinol dehydrogenase 5 (11-cis/9-cis)
ENSG00000257954.1	5.85905	-1.95697	0.000362063	0.0137665	0	0	0.53	0.4	Up	RP11-161H23.10	chr12	processed_pseudogene
ENSG00000261094.2	1.83014	1.4865	1.15765e-05	0.00138465	0.42	0.38	2.06	0.93	Up	RP11-355O1.11	chr9	sense_overlapping
ENSG00000246350.1	6.53443	-1.47625	3.71355e-06	0.000640506	0	0	0.03	0.3	Up	RP5-1186N24.3	chr6	antisense
ENSG00000224621.1	2.17593	-0.431955	0.000261141	0.0113632	0.33	0.42	2.03	1.61	Up	RP11-276H7.3	chr1	antisense
ENSG00000154263.17	5.57419	-2.14036	0.00109423	0.0289386	0	0	0.08	0	Up	ABCA10	chr17	protein_coding	ATP-binding cassette, sub-family A (ABC1), member 10
ENSG00000199293.1	7.06871	-1.06444	2.81513e-08	1.42565e-05	0	0	9.51	1.11	Up	SNORA21	chr17	snoRNA	small nucleolar RNA, H/ACA box 21
ENSG00000215424.9	1.48317	3.28349	6.02768e-05	0.0044227	0.7	0.66	1.67	2.34	Up	MCM3AP-AS1	chr21	antisense	MCM3AP antisense RNA 1
ENSG00000228786.5	5.56122	-2.14763	0.00109423	0.0289386	0	0	0.16	0.25	Up	LINC00266-4P	chrY	lincRNA	long intergenic non-protein coding RNA 266-4, pseudogene
ENSG00000214106.7	2.43626	-1.19356	0.00164277	0.0390208	0	0.06	0.17	0.2	Up	PAXIP1-AS2	chr7	antisense	PAXIP1 antisense RNA 2
ENSG00000226686.7	2.26935	-1.05956	0.00141022	0.0355573	0.11	0	0.29	0.31	Up	LINC01535	chr19	lincRNA	long intergenic non-protein coding RNA 1535
ENSG00000280077.1	2.46329	0.249181	1.87318e-06	0.000405323	0	0.31	1.42	0.4	Up	RP11-87H9.4	chr9	TEC
ENSG00000275401.1	6.38231	-1.59229	9.76248e-06	0.00121658	0	0	0.95	0.25	Up	RP4-564F22.7	chr20	lincRNA
ENSG00000224409.1	5.75441	-2.0245	0.000362063	0.0137665	0	0	0	1.39	Up	RP11-114B7.6	chr1	antisense
ENSG00000280164.1	2.53376	-0.310964	2.30146e-05	0.00220968	0.18	0.18	1.84	0.35	Up	CH507-254M2.3	chr21	lincRNA
ENSG00000129493.14	1.24835	3.85343	0.000542461	0.019504	0.68	1.29	2.3	2.61	Up	HEATR5A	chr14	protein_coding	HEAT repeat containing 5A
ENSG00000240053.8	1.84955	1.09754	2.09708e-05	0.00207115	0.34	0.23	1.51	0.65	Up	LY6G5B	chr6	protein_coding	lymphocyte antigen 6 complex, locus G5B
ENSG00000267249.1	6.3034	-1.64769	1.59929e-05	0.00165506	0	0	0.32	0.81	Up	RP11-973H7.3	chr18	sense_intronic
ENSG00000273576.1	3.54407	0.339773	9.11777e-10	9.4619e-07	0.28	0.21	4.01	2.21	Up	RP11-390P24.1	chr17	lincRNA
ENSG00000272669.1	2.34621	-0.796934	0.000364854	0.0138065	0.28	0.28	2.17	0.89	Up	RP3-508I15.21	chr22	antisense
ENSG00000139155.8	5.67793	-2.07521	0.000626635	0.0205161	0	0	0.14	0.01	Up	SLCO1C1	chr12	protein_coding	solute carrier organic anion transporter family, member 1C1
ENSG00000101115.12	1.35218	3.2239	0.000234999	0.0104355	1.04	0.78	3.02	1.84	Up	SALL4	chr20	protein_coding	spalt-like transcription factor 4
ENSG00000132718.8	1.93943	-0.90114	0.00247683	0.0496672	0.04	0.02	0.18	0.07	Up	SYT11	chr1	protein_coding	synaptotagmin XI
ENSG00000244176.1	1.65428	0.831971	0.000229227	0.0102365	1.12	0.59	3.62	2.06	Up	RP11-810P12.1	chr11	processed_pseudogene
ENSG00000225828.1	3.4544	-1.20188	9.64734e-05	0.00605873	0.06	0.07	0.6	1.04	Up	FAM229A	chr1	protein_coding	family with sequence similarity 229, member A
ENSG00000277644.1	3.05047	4.25779	2.94865e-15	1.40367e-11	45.31	107	132.02	1198.17	Up	FP236383.12	chr21	miRNA
ENSG00000114805.16	6.10949	-1.78726	7.34591e-05	0.0048704	0	0	0.08	0.02	Up	PLCH1	chr3	protein_coding	phospholipase C, eta 1
ENSG00000272872.1	1.56257	2.14319	6.23249e-05	0.00451464	2.81	2.89	10.86	6.84	Up	LL22NC03-N14H11.1	chr22	sense_intronic
ENSG00000235652.7	3.37836	-1.89826	0.00247689	0.0496672	0.01	0	0.06	0.09	Up	RP11-545I5.3	chr6	antisense
ENSG00000229891.1	6.64689	-1.39201	1.45017e-06	0.000325632	0	0	0.27	0.64	Up	LINC01315	chr22	lincRNA	long intergenic non-protein coding RNA 1315
ENSG00000260139.6	6.96395	-1.14423	9.97305e-08	3.89145e-05	0	0	0.07	0.2	Up	CSPG4P13	chr15	transcribed_unprocessed_pseudogene	chondroitin sulfate proteoglycan 4 pseudogene 13
ENSG00000236194.3	4.28581	0.549885	1.41934e-12	4.22289e-09	0.06	0.09	2.87	0.37	Up	AC003104.1	chr17	sense_intronic
ENSG00000165168.7	1.37057	0.966595	0.00154178	0.0376384	0.31	0.12	0.68	0.5	Up	CYBB	chrX	protein_coding	cytochrome b-245, beta polypeptide
ENSG00000196295.11	1.23295	2.8107	0.000979472	0.028782	0.59	0.47	1.69	0.94	Up	AC005154.6	chr7	processed_transcript
ENSG00000240291.1	1.89858	0.00923702	0.000329644	0.0137411	0.29	0.14	1.16	0.56	Up	RP11-499P20.2	chr10	antisense
ENSG00000221817.9	1.30637	1.24682	0.0018677	0.0409813	0.34	0.17	0.73	0.6	Up	PPP3CB-AS1	chr10	processed_transcript	PPP3CB antisense RNA 1 (head to head)
ENSG00000261433.1	5.46063	-2.20966	0.00192837	0.0409813	0	0	0.84	0	Up	CTC-297N7.1	chr17	lincRNA
ENSG00000279632.1	6.37559	-1.59631	9.76248e-06	0.00121658	0	0	0.56	0.42	Up	RP11-286N22.6	chr11	TEC
ENSG00000217128.11	1.25738	3.89789	0.000497629	0.018111	1.01	1.36	3.39	2.55	Up	FNIP1	chr5	protein_coding	folliculin interacting protein 1
ENSG00000270104.1	5.46063	-2.20966	0.00192837	0.0409813	0	0	0.8	0	Up	RP11-245P10.6	chr1	lincRNA
ENSG00000196388.8	2.18156	-0.427848	0.000261141	0.0113632	0.18	0.09	0.88	0.4	Up	INCA1	chr17	protein_coding	inhibitor of CDK, cyclin A1 interacting protein 1
ENSG00000166206.13	3.50547	-1.165	6.61098e-05	0.00472536	0	0.01	0.09	0.09	Up	GABRB3	chr15	protein_coding	gamma-aminobutyric acid (GABA) A receptor, beta 3
ENSG00000260515.1	6.85917	-1.23085	2.37948e-07	7.86616e-05	0	0	0.42	0.06	Up	CTD-2199O4.3	chr5	lincRNA
ENSG00000279265.1	3.29419	-1.95198	0.00247689	0.0496672	0	0.1	0.83	0.4	Up	AC000123.3	chr7	TEC
ENSG00000033122.18	5.67952	-2.07431	0.000626635	0.0205161	0	0	0.06	0	Up	LRRC7	chr1	protein_coding	leucine rich repeat containing 7
ENSG00000215386.10	2.73681	-1.29559	0.000916329	0.0273314	0	0.03	0.18	0.04	Up	MIR99AHG	chr21	lincRNA	mir-99a-let-7c cluster host gene
ENSG00000259895.1	5.77774	-2.01123	0.000362063	0.0137665	0	0	0.17	0	Up	RP11-715J22.2	chr16	antisense
ENSG00000260167.1	5.66998	-2.0797	0.000626635	0.0205161	0	0	0.63	0.45	Up	RP11-146F11.5	chr16	antisense
ENSG00000172403.10	2.55846	-0.854324	0.000210038	0.00971433	0.02	0	0.07	0.04	Up	SYNPO2	chr4	protein_coding	synaptopodin 2
ENSG00000146556.14	1.15775	2.96012	0.00176218	0.0409813	1.9	1.02	3.96	2.89	Up	WASH2P	chr2	transcribed_unprocessed_pseudogene	WAS protein family homolog 2 pseudogene
ENSG00000223117.1	5.56284	-2.14672	0.00109423	0.0289386	0	0	0.67	0.75	Up	RN7SKP296	chr3	misc_RNA	RNA, 7SK small nuclear pseudogene 296
ENSG00000270574.1	5.76839	-2.01654	0.000362063	0.0137665	0	0	0.16	0.1	Up	RP11-171I2.2	chr2	antisense
ENSG00000160323.18	5.95627	-1.89296	0.000123998	0.00687972	0	0	0.12	0	Up	ADAMTS13	chr9	protein_coding	ADAM metallopeptidase with thrombospondin type 1 motif, 13
ENSG00000271983.1	5.57257	-2.14127	0.00109423	0.0289386	0	0	0.93	0.07	Up	RP11-28H5.2	chr15	lincRNA
ENSG00000276550.4	1.17606	4.65802	0.000950535	0.0281401	2.7	1.91	6.05	4.88	Up	HERC2P2	chr15	transcribed_unprocessed_pseudogene	hect domain and RLD 2 pseudogene 2
ENSG00000257878.1	5.45897	-2.21059	0.00192837	0.0409813	0	0	0.49	0.04	Up	RP11-256L6.3	chr12	antisense
ENSG00000167483.17	3.77169	-1.63813	0.000223889	0.0100358	0	0.01	0.16	0.1	Up	FAM129C	chr19	protein_coding	family with sequence similarity 129, member C
ENSG00000262668.1	2.22279	-1.09219	0.00194451	0.0411773	0.22	0.14	0.79	1.04	Up	AJ003147.9	chr16	antisense
ENSG00000174990.4	5.57257	-2.14127	0.00109423	0.0289386	0	0	0.06	0	Up	CA5A	chr16	protein_coding	carbonic anhydrase VA, mitochondrial
ENSG00000170325.14	1.28055	3.35895	0.000466966	0.0171523	0.9	0.74	2.04	2.15	Up	PRDM10	chr11	protein_coding	PR domain containing 10
ENSG00000276644.4	2.27418	-0.50176	0.000283877	0.0122407	0.07	0	0.11	0.24	Up	DACH1	chr13	protein_coding	dachshund family transcription factor 1
ENSG00000261379.1	5.67952	-2.07431	0.000626635	0.0205161	0	0	0.52	0	Up	RP11-395N3.1	chr2	sense_intronic
ENSG00000221947.7	6.0247	-1.84504	0.000123998	0.00687972	0	0	0.1	0.1	Up	XKR9	chr8	protein_coding	XK, Kell blood group complex subunit-related family, member 9
ENSG00000281039.1	6.44087	-1.54891	6.0008e-06	0.000855275	0	0	0.94	0.37	Up	RP4-777O23.3	chr7	protein_coding
ENSG00000261353.1	2.75748	-0.303077	3.31124e-06	0.000595773	0	0.93	4.12	2.67	Up	CTA-14H9.5	chr6	lincRNA
ENSG00000175175.5	6.25858	-1.68267	1.59929e-05	0.00165506	0	0	0.12	0	Up	PPM1E	chr17	protein_coding	protein phosphatase, Mg2+/Mn2+ dependent, 1E
ENSG00000273387.1	6.32253	-1.6363	1.59929e-05	0.00165506	0	0	0.54	0.05	Up	RP3-412A9.16	chr22	antisense
ENSG00000259523.1	6.59671	-1.43046	2.31323e-06	0.000447638	0	0	0.24	0.45	Up	RP11-680F8.3	chr15	antisense
ENSG00000151468.10	2.12	-0.114878	8.69196e-05	0.00556145	0.05	0.1	0.56	0.13	Up	CCDC3	chr10	protein_coding	coiled-coil domain containing 3
ENSG00000244567.1	2.40122	-0.411061	7.98289e-05	0.00518737	0.07	0.22	1.12	0.52	Up	AC096772.6	chr2	lincRNA
ENSG00000196628.13	6.1066	-1.78894	7.34591e-05	0.0048704	0	0	0.04	0.02	Up	TCF4	chr18	protein_coding	transcription factor 4
ENSG00000270533.2	6.44483	-1.54653	6.0008e-06	0.000855275	0	0	0.41	0.08	Up	bP-21201H5.1	chr21	transcribed_processed_pseudogene
ENSG00000231881.1	1.67916	-0.14899	0.00143896	0.036167	0.08	0.34	0.8	0.64	Up	RP5-1120P11.3	chr6	lincRNA
ENSG00000198169.8	1.14171	3.45358	0.00173056	0.0405608	2.36	2.03	4.79	5.4	Up	ZNF251	chr8	protein_coding	zinc finger protein 251
ENSG00000215417.10	2.162	0.767691	4.04551e-06	0.000692742	0.08	0.29	1.11	0.65	Up	MIR17HG	chr13	processed_transcript	miR-17-92 cluster host gene
ENSG00000186417.13	3.6931	-1.69111	0.000358374	0.0137665	0	0.01	0.05	0.1	Up	GLDN	chr15	protein_coding	gliomedin
ENSG00000114739.13	1.30409	3.70083	0.000326791	0.0136701	0.48	0.67	1.59	1.38	Up	ACVR2B	chr3	protein_coding	activin A receptor, type IIB
ENSG00000156011.16	1.3155	4.38424	0.000241169	0.0106788	0.6	1.18	2.82	1.81	Up	PSD3	chr8	protein_coding	pleckstrin and Sec7 domain containing 3
ENSG00000213077.5	2.92869	-0.579076	7.41314e-06	0.00100827	0.02	0.08	0.73	0.1	Up	FAM106A	chr17	protein_coding	family with sequence similarity 106, member A
ENSG00000235081.1	5.44409	-2.21887	0.00192837	0.0409813	0	0	0.08	0.41	Up	AC010492.2	chr19	processed_pseudogene
ENSG00000173376.13	5.86057	-1.9561	0.000211004	0.00971433	0	0	0.13	0.08	Up	NDNF	chr4	protein_coding	neuron-derived neurotrophic factor
ENSG00000228137.1	2.16396	-0.745197	0.000592336	0.0205161	0.35	0.47	2.54	1.4	Up	AP001469.7	chr21	antisense
ENSG00000249655.1	5.77618	-2.01212	0.000362063	0.0137665	0	0	0.97	0.07	Up	CTC-325J23.2	chr5	antisense
ENSG00000242574.8	5.75441	-2.0245	0.000362063	0.0137665	0	0	0	0.39	Up	HLA-DMB	chr6	protein_coding	major histocompatibility complex, class II, DM beta
ENSG00000066468.20	6.80274	-1.27328	3.70609e-07	0.000110265	0	0	0.1	0.07	Up	FGFR2	chr10	protein_coding	fibroblast growth factor receptor 2
ENSG00000088053.11	6.16462	-1.74651	4.38607e-05	0.00338952	0	0	0.05	0.27	Up	GP6	chr19	protein_coding	glycoprotein VI (platelet)
ENSG00000225880.5	2.32905	0.334965	5.68451e-06	0.000855275	0.34	0.17	1.21	1.55	Up	LINC00115	chr1	lincRNA	long intergenic non-protein coding RNA 115
ENSG00000204406.11	1.29277	1.94855	0.000972725	0.0286545	0.11	0.21	0.43	0.4	Up	MBD5	chr2	protein_coding	methyl-CpG binding domain protein 5
ENSG00000156966.6	5.94877	-1.89728	0.000211004	0.00971433	0	0	0.12	0.05	Up	B3GNT7	chr2	protein_coding	UDP-GlcNAc:betaGal beta-1,3-N-acetylglucosaminyltransferase 7
ENSG00000165923.15	5.44739	-2.21703	0.00192837	0.0409813	0	0	0.04	0.07	Up	AGBL2	chr11	protein_coding	ATP/GTP binding protein-like 2
ENSG00000273162.1	1.57484	0.686079	0.000620674	0.0205161	0.42	0.98	2.18	2.2	Up	RP11-108L7.15	chr10	lincRNA
ENSG00000166575.16	1.1601	3.27961	0.00150958	0.0371254	1.12	1.58	3.43	2.91	Up	TMEM135	chr11	protein_coding	transmembrane protein 135
ENSG00000269961.1	5.56284	-2.14672	0.00109423	0.0289386	0	0	0.45	0.5	Up	CTD-2033C11.1	chr5	lincRNA
ENSG00000255345.1	2.18509	-0.426441	0.000261141	0.0113632	0.06	0.12	0.66	0.23	Up	CTD-2337I7.1	chr11	lincRNA
ENSG00000280152.1	1.7151	-0.404096	0.00228529	0.0467605	0.07	0.07	0.27	0.2	Up	RP11-331F4.5	chr16	TEC
ENSG00000281195.1	5.67952	-2.07431	0.000626635	0.0205161	0	0	0.33	0	Up	ZNF638-IT1	chr2	processed_transcript	ZNF638 intronic transcript 1
ENSG00000279481.1	5.56608	-2.14491	0.00109423	0.0289386	0	0	0.12	0.07	Up	RP11-181K12.1	chr4	TEC
ENSG00000100027.14	1.58084	-0.0575269	0.00192087	0.0409813	0	0.18	0.19	0.37	Up	YPEL1	chr22	protein_coding	yippee-like 1 (Drosophila)
ENSG00000187492.8	2.47873	-0.515216	4.78604e-05	0.00366293	0.06	0.04	0.41	0.2	Up	CDHR4	chr3	protein_coding	cadherin-related family member 4
ENSG00000280378.1	3.56218	-1.78073	0.000576632	0.0202135	0	0.03	0.39	0	Up	RP4-758J24.6	chr1	TEC
ENSG00000273064.1	6.37693	-1.59551	9.76248e-06	0.00121658	0	0	0.54	0.34	Up	RP11-474G23.3	chr2	antisense
ENSG00000228109.1	3.28952	-1.9546	0.00247689	0.0496672	0	0.05	0.28	0.31	Up	MFI2-AS1	chr3	antisense	MFI2 antisense RNA 1
ENSG00000278272.1	-1.88958	0.934933	1.56703e-05	0.00165506	5.62	7.43	0.56	3.11	Down	HIST1H3C	chr6	protein_coding	histone cluster 1, H3c
ENSG00000245748.1	-5.80278	-2.16701	0.000626635	0.0205161	0.13	0	0	0	Down	RP11-367J11.2	chr4	antisense
ENSG00000175701.10	-1.17117	3.04286	0.00145008	0.036408	5.21	4.87	2.65	2.05	Down	LINC00116	chr2	protein_coding	long intergenic non-protein coding RNA 116
ENSG00000227210.1	-6.117	-1.96098	0.000123998	0.00687972	0.33	0.93	0	0	Down	AC079145.4	chr2	antisense
ENSG00000215375.6	-1.86655	0.77555	2.09013e-05	0.00207115	0.38	1.17	0.06	0.38	Down	MYL5	chr4	protein_coding	myosin, light chain 5, regulatory
ENSG00000167165.18	-6.29688	-1.83621	2.63878e-05	0.00237012	0.19	0.08	0	0	Down	UGT1A6	chr2	protein_coding	UDP glucuronosyltransferase 1 family, polypeptide A6
ENSG00000129946.10	-1.79948	-0.0888226	0.000440173	0.0162939	0.45	0.55	0.18	0.12	Down	SHC2	chr19	protein_coding	SHC (Src homology 2 domain containing) transforming protein 2
ENSG00000279686.1	-2.54404	-0.883989	0.0001126	0.00680232	0.54	0.96	0.19	0.07	Down	ECSCR	chr5	protein_coding	endothelial cell surface expressed chemotaxis and apoptosis regulator
ENSG00000246640.1	-1.35764	0.785042	0.0019381	0.0411514	1.32	0.4	0.32	0.39	Down	RP11-1094H24.4	chr17	lincRNA
ENSG00000171533.11	-6.78729	-1.4696	9.1478e-07	0.00021558	0.06	0.12	0	0	Down	MAP6	chr11	protein_coding	microtubule-associated protein 6
ENSG00000161653.10	-1.38487	1.05014	0.00100232	0.0289386	1	1.44	0.59	0.38	Down	NAGS	chr17	protein_coding	N-acetylglutamate synthase
ENSG00000276390.1	-2.00011	-0.721136	0.000693776	0.0218141	0.26	2.82	0.29	0.49	Down	RP1-197B17.5	chr12	sense_intronic
ENSG00000223714.1	-3.35389	-1.67443	0.000659045	0.0210888	0.54	0.44	0.09	0	Down	RP5-1172N10.2	chrX	lincRNA
ENSG00000272076.1	-5.80278	-2.16701	0.000626635	0.0205161	0.95	0	0	0	Down	RP11-11C20.3	chr8	lincRNA
ENSG00000277491.1	-5.54328	-2.32379	0.00192837	0.0409813	0.46	0.47	0	0	Down	RP11-676J12.9	chr17	lincRNA
ENSG00000229659.1	-1.61837	-0.281019	0.00204298	0.0427804	3.41	1.35	0.96	0.67	Down	RP11-345K20.2	chr10	processed_pseudogene
ENSG00000149633.11	-2.14472	0.82414	1.85321e-06	0.000404681	0.55	0.24	0	0.18	Down	KIAA1755	chr20	protein_coding	KIAA1755
ENSG00000147697.8	-2.27164	-0.918005	0.00066392	0.0210888	0.35	0.17	0.07	0.04	Down	GSDMC	chr8	protein_coding	gasdermin C
ENSG00000256196.1	-4.1075	-1.78271	0.000223889	0.0100358	0.37	0.53	0	0.04	Down	RP11-881M11.4	chr11	antisense
ENSG00000104863.11	-1.62827	0.238734	0.000625942	0.0205161	2.69	1.21	0.72	0.6	Down	LIN7B	chr19	protein_coding	lin-7 homolog B (C. elegans)
ENSG00000118298.10	-5.54186	-2.32447	0.00192837	0.0409813	0	0.19	0	0	Down	CA14	chr1	protein_coding	carbonic anhydrase XIV
ENSG00000198618.5	-1.74428	-0.0770711	0.000583451	0.0204225	2.91	2.11	0.23	1.32	Down	PPIAP22	chr21	processed_pseudogene	peptidylprolyl isomerase A (cyclophilin A) pseudogene 22
ENSG00000073331.17	-1.61245	-0.226166	0.0017542	0.0409813	0.18	0.22	0.04	0.09	Down	ALPK1	chr4	protein_coding	alpha-kinase 1
ENSG00000204542.2	-5.54469	-2.32311	0.00192837	0.0409813	0.4	0	0	0	Down	C6orf15	chr6	protein_coding	chromosome 6 open reading frame 15
ENSG00000260869.1	-1.48068	0.127638	0.00226997	0.0465666	3.97	3.39	0.71	2.03	Down	AC002310.13	chr16	protein_coding
ENSG00000204380.4	-3.72741	-2.03039	0.00247689	0.0496672	0.08	0.02	0	0.01	Down	AC005042.4	chr2	antisense
ENSG00000278189.1	-7.41135	-0.957789	1.73953e-09	1.47873e-06	10.96	0	0	0	Down	RNA5-8S5	chr21	rRNA	RNA, 5.8S ribosomal 5
ENSG00000275092.1	-1.80845	-0.643017	0.00188454	0.0409813	1.44	0.82	0.26	0.4	Down	LA16c-329F2.2	chr16	sense_intronic
ENSG00000140285.9	-2.05414	-0.918606	0.00185838	0.0409813	0.15	0.06	0.05	0	Down	FGF7	chr15	protein_coding	fibroblast growth factor 7
ENSG00000175344.16	-3.35293	-1.67493	0.000659045	0.0210888	0.05	0.09	0.01	0	Down	CHRNA7	chr15	protein_coding	cholinergic receptor, nicotinic, alpha 7 (neuronal)
ENSG00000179709.8	-5.67949	-2.24304	0.00109423	0.0289386	0.13	0	0	0	Down	NLRP8	chr19	protein_coding	NLR family, pyrin domain containing 8
ENSG00000085741.12	-2.9602	-0.759227	8.48136e-06	0.00114701	0.56	0.33	0.1	0.02	Down	WNT11	chr11	protein_coding	wingless-type MMTV integration site family, member 11
ENSG00000235790.7	-6.21045	-1.89693	4.38607e-05	0.00338952	0.33	0.15	0	0	Down	RP11-73M7.6	chr1	antisense
ENSG00000073282.12	-2.36891	-1.01802	0.000541144	0.019504	0.1	0.1	0	0.04	Down	TP63	chr3	protein_coding	tumor protein p63
ENSG00000253516.1	-6.8445	-1.42436	5.80548e-07	0.000157025	0.31	2.28	0	0	Down	HMGB1P41	chr8	processed_pseudogene	high mobility group box 1 pseudogene 41
ENSG00000118473.21	-5.67644	-2.24452	0.00109423	0.0289386	0	0.06	0	0	Down	SGIP1	chr1	protein_coding	SH3-domain GRB2-like (endophilin) interacting protein 1
ENSG00000223382.3	-5.67949	-2.24304	0.00109423	0.0289386	0.45	0	0	0	Down	RP1-65J11.1	chr1	lincRNA
ENSG00000137975.7	-2.415	-1.15264	0.000591179	0.0205161	0.21	0.08	0.06	0	Down	CLCA2	chr1	protein_coding	chloride channel accessory 2
ENSG00000164363.9	-6.37794	-1.77809	1.59929e-05	0.00165506	0.23	0.15	0	0	Down	SLC6A18	chr5	protein_coding	solute carrier family 6 (neutral amino acid transporter), member 18
ENSG00000272267.2	-5.54469	-2.32311	0.00192837	0.0409813	0.33	0	0	0	Down	RP11-375N15.2	chr8	antisense
ENSG00000246465.1	-4.86712	-1.21642	7.8154e-07	0.000200024	0.13	0.4	0.02	0	Down	RP11-57A19.2	chr16	lincRNA
ENSG00000260542.1	-5.54469	-2.32311	0.00192837	0.0409813	0.21	0	0	0	Down	RP13-379O24.2	chr20	lincRNA
ENSG00000240376.1	-4.26579	-1.6705	8.87579e-05	0.00560375	1.15	0.22	0.06	0	Down	RP11-36C20.1	chr5	processed_pseudogene
ENSG00000225969.1	-3.64486	-1.47661	2.30266e-05	0.00220968	1.14	0.65	0	0.13	Down	ABHD11-AS1	chr7	antisense	ABHD11 antisense RNA 1 (tail to tail)
ENSG00000121577.13	-2.97798	-1.22662	6.61098e-05	0.00472536	0.41	0.12	0	0.07	Down	POPDC2	chr3	protein_coding	popeye domain containing 2
ENSG00000018869.16	-6.59794	-1.61551	3.71355e-06	0.000640506	0.19	0.12	0	0	Down	ZNF582	chr19	protein_coding	zinc finger protein 582
ENSG00000253704.1	-6.11981	-1.95955	0.000123998	0.00687972	0.38	0	0	0	Down	RP11-267M23.4	chr8	lincRNA
ENSG00000260461.1	-3.34021	-0.274481	1.87001e-08	1.03511e-05	0.76	0.32	0	0.11	Down	RP11-541N10.3	chr10	sense_overlapping
ENSG00000242195.1	-5.67644	-2.24452	0.00109423	0.0289386	0	0.42	0	0	Down	SRRM1P2	chr3	processed_pseudogene	serine/arginine repetitive matrix 1 pseudogene 2
ENSG00000204455.7	-3.82772	-1.96485	0.00151609	0.0371254	0	0.47	0.03	0	Down	TRIM51BP	chr11	unprocessed_pseudogene	tripartite motif-containing 51B, pseudogene
ENSG00000178445.8	-1.75144	0.166705	0.000255588	0.0112035	0.41	0.39	0.09	0.16	Down	GLDC	chr9	protein_coding	glycine dehydrogenase (decarboxylating)
ENSG00000215262.7	-3.09814	-1.84516	0.000576632	0.0202135	0.08	0.1	0	0.02	Down	KCNU1	chr8	protein_coding	potassium channel, subfamily U, member 1
ENSG00000245261.1	-4.40957	-1.56914	3.59209e-05	0.0030755	0.55	0.42	0	0.04	Down	RP3-330M21.5	chr6	antisense
ENSG00000183018.8	-1.29974	1.00188	0.00197029	0.0415753	0.85	0.61	0.2	0.42	Down	SPNS2	chr17	protein_coding	spinster homolog 2 (Drosophila)
ENSG00000136488.14	-6.20795	-1.89823	7.34591e-05	0.0048704	0.04	0.58	0	0	Down	CSH1	chr17	protein_coding	chorionic somatomammotropin hormone 1 (placental lactogen)
ENSG00000234618.1	-3.83065	-1.96536	0.00151609	0.0371254	0.15	0.56	0	0.04	Down	RPSAP9	chr9	processed_pseudogene	ribosomal protein SA pseudogene 9
ENSG00000262769.1	-2.98664	-1.52725	0.000280714	0.012143	1.18	0.06	0	0.15	Down	RP11-1113L8.1	chr17	antisense
ENSG00000163624.5	-4.3419	-1.61863	5.63203e-05	0.00420231	0.2	0	0	0.01	Down	CDS1	chr4	protein_coding	CDP-diacylglycerol synthase (phosphatidate cytidylyltransferase) 1
ENSG00000258701.1	-2.37619	0.934334	1.11632e-07	4.21756e-05	1.04	1.23	0.15	0.3	Down	LINC00638	chr14	lincRNA	long intergenic non-protein coding RNA 638
ENSG00000126353.3	-6.37963	-1.7772	1.59929e-05	0.00165506	0.33	0	0	0	Down	CCR7	chr17	protein_coding	chemokine (C-C motif) receptor 7
ENSG00000249141.1	-1.62154	1.29804	9.90219e-05	0.00616994	5.74	5.32	1.21	2.56	Down	RP11-514O12.4	chr6	protein_coding
ENSG00000231999.6	-2.66852	-1.73358	0.00156874	0.037895	0.37	0	0	0.06	Down	FLJ27354	chr1	antisense
ENSG00000110944.8	-3.46224	-1.18285	7.25231e-06	0.0010036	0.78	0.44	0.07	0.03	Down	IL23A	chr12	protein_coding	interleukin 23, alpha subunit p19
ENSG00000236824.1	-1.20522	2.15505	0.00161752	0.0387717	0.55	0.28	0.17	0.21	Down	BCYRN1	chr2	lincRNA	brain cytoplasmic RNA 1
ENSG00000253616.5	-1.59428	2.06308	4.69045e-05	0.00360135	7.41	5.43	2.81	1.66	Down	RP11-875O11.3	chr8	antisense
ENSG00000133454.15	-6.20995	-1.89719	4.38607e-05	0.00338952	0.05	0.04	0	0	Down	MYO18B	chr22	protein_coding	myosin XVIIIB
ENSG00000254973.1	-6.02166	-2.02558	0.000211004	0.00971433	0.35	0	0	0	Down	RP11-429J17.7	chr8	lincRNA
ENSG00000215533.8	-5.54186	-2.32447	0.00192837	0.0409813	0	0.42	0	0	Down	LINC00189	chr21	sense_overlapping	long intergenic non-protein coding RNA 189
ENSG00000266921.1	-2.39798	-0.683762	0.000144719	0.00772934	0.37	0.22	0.08	0.04	Down	RP11-15A1.7	chr19	antisense
ENSG00000225541.1	-3.56205	-1.10923	3.35407e-06	0.000595773	0.49	0.57	0.03	0.06	Down	AC002480.5	chr7	sense_overlapping
ENSG00000182050.13	-4.10781	-1.78057	0.000223889	0.0100358	0.03	0	0	0	Down	MGAT4C	chr12	protein_coding	MGAT4 family, member C
ENSG00000224397.5	-1.73131	0.398787	0.000241822	0.0106788	0.86	0.91	0.21	0.35	Down	LINC01272	chr20	lincRNA	long intergenic non-protein coding RNA 1272
ENSG00000233264.2	-5.9161	-2.09477	0.000362063	0.0137665	0.37	0.03	0	0	Down	AC006042.8	chr7	processed_pseudogene
ENSG00000215182.8	-1.86286	3.68627	4.3052e-07	0.000121991	1.41	0.69	0.28	0.32	Down	MUC5AC	chr11	protein_coding	mucin 5AC, oligomeric mucus/gel-forming
ENSG00000240729.1	-5.54469	-2.32311	0.00192837	0.0409813	0.95	0	0	0	Down	CTD-2301A4.3	chr5	processed_pseudogene
ENSG00000039987.6	-3.72795	-2.03013	0.00247689	0.0496672	0.24	0.02	0	0.02	Down	BEST2	chr19	protein_coding	bestrophin 2
ENSG00000256940.1	-1.33371	1.82108	0.000662794	0.0210888	7.44	7.79	3.95	2.39	Down	RP11-783K16.5	chr11	antisense
ENSG00000117281.15	-2.6671	-1.43911	0.000666279	0.0210888	0.01	0.23	0.01	0.03	Down	CD160	chr1	protein_coding	CD160 molecule
ENSG00000184923.12	-5.54271	-2.32407	0.00192837	0.0409813	0.03	0.06	0	0	Down	NUTM2A	chr10	protein_coding	NUT family member 2A
ENSG00000258779.6	-2.52249	-1.528	0.00146982	0.0367004	0.22	0.01	0.04	0	Down	LINC01568	chr16	lincRNA	long intergenic non-protein coding RNA 1568
ENSG00000214941.7	-1.35808	2.20962	0.000406188	0.0151775	3.3	2.41	1.12	1.22	Down	ZSWIM7	chr17	protein_coding	zinc finger, SWIM-type containing 7
ENSG00000275454.1	-3.93064	-1.90113	0.000576632	0.0202135	0.41	0.15	0	0.03	Down	CTD-2026K11.4	chr15	antisense
ENSG00000272092.1	-2.57949	-1.05009	0.000215688	0.00981087	0.21	1	0	0.2	Down	RP11-350N15.5	chr8	lincRNA
ENSG00000116176.6	-1.8303	-0.360055	0.000947524	0.0280859	1.02	0.82	0.31	0.23	Down	TPSG1	chr16	protein_coding	tryptase gamma 1
ENSG00000178732.5	-5.91636	-2.09463	0.000362063	0.0137665	0.17	0	0	0	Down	GP5	chr3	protein_coding	glycoprotein V (platelet)
ENSG00000267042.1	-2.4508	-1.57977	0.00219032	0.0453051	1.25	0.25	0.07	0.2	Down	CTD-3193K9.4	chr17	antisense
ENSG00000116819.6	-2.49995	-1.31182	0.00063657	0.0206707	0.31	0.17	0	0.08	Down	TFAP2E	chr1	protein_coding	transcription factor AP-2 epsilon (activating enhancer binding protein 2 epsilon)
ENSG00000075340.22	-7.10964	-1.21133	4.26969e-08	2.03254e-05	0.11	0.02	0	0	Down	ADD2	chr2	protein_coding	adducin 2 (beta)
ENSG00000274735.1	-2.71672	-0.60375	5.52912e-06	0.000855275	25.08	8.96	0	5.22	Down	FP236383.3	chr21	miRNA
ENSG00000225094.3	-5.54186	-2.32447	0.00192837	0.0409813	0	0.54	0	0	Down	SETP20	chr4	processed_pseudogene	SET pseudogene 20
ENSG00000214514.7	-1.47272	0.532935	0.00124024	0.0319483	0.56	0.42	0.08	0.29	Down	KRT42P	chr17	transcribed_unprocessed_pseudogene	keratin 42 pseudogene
ENSG00000224261.2	-5.54469	-2.32311	0.00192837	0.0409813	0.51	0	0	0	Down	RP11-179G5.1	chr1	processed_pseudogene
ENSG00000230439.2	-2.05093	0.584152	1.06616e-05	0.00130316	0.79	1.77	0.16	0.48	Down	RP11-488P3.1	chr1	sense_intronic
ENSG00000237440.8	-1.87677	-0.806312	0.00156807	0.037895	0.29	0.18	0.04	0.09	Down	ZNF737	chr19	protein_coding	zinc finger protein 737
ENSG00000148680.15	-1.958	-0.863733	0.00139499	0.0352854	0.06	0.39	0.06	0.06	Down	HTR7	chr10	protein_coding	5-hydroxytryptamine (serotonin) receptor 7, adenylate cyclase-coupled
ENSG00000228176.1	-5.9161	-2.09477	0.000362063	0.0137665	1.09	0.09	0	0	Down	RP4-656G21.1	chr1	lincRNA
ENSG00000101222.12	-3.9422	-0.468215	5.4393e-09	3.90795e-06	0.66	0.81	0	0.09	Down	SPEF1	chr20	protein_coding	sperm flagellar 1
ENSG00000159231.5	-1.14579	2.47467	0.00228093	0.0467218	6.98	4.84	2.83	2.78	Down	CBR3	chr21	protein_coding	carbonyl reductase 3
ENSG00000107719.8	-1.61172	1.09567	0.000143941	0.00771639	0.94	0.31	0.15	0.28	Down	PALD1	chr10	protein_coding	phosphatase domain containing, paladin 1
ENSG00000076258.9	-5.54186	-2.32447	0.00192837	0.0409813	0	0.2	0	0	Down	FMO4	chr1	protein_coding	flavin containing monooxygenase 4
ENSG00000279965.1	-4.18788	-1.7251	0.000140602	0.00762326	0.27	0.13	0.02	0	Down	RP11-472K17.3	chr13	TEC
ENSG00000155530.2	-3.725	-2.02961	0.00247689	0.0496672	0.13	0.06	0.01	0	Down	LRGUK	chr7	protein_coding	leucine-rich repeats and guanylate kinase domain containing
ENSG00000269997.1	-2.66524	-1.43455	0.000666279	0.0210888	1.56	0.16	0.28	0	Down	RP11-214K3.21	chr12	sense_intronic
ENSG00000269444.1	-5.67644	-2.24452	0.00109423	0.0289386	0	1.12	0	0	Down	CTB-180A7.6	chr19	sense_overlapping
ENSG00000280734.2	-1.79654	-0.7512	0.00224594	0.046124	0.16	0.17	0.03	0.06	Down	LINC01232	chr13	processed_transcript	long intergenic non-protein coding RNA 1232
ENSG00000272476.1	-1.83558	-0.00388711	0.0002727	0.011823	0.44	0.6	0.13	0.17	Down	RP1-191J18.66	chr6	antisense
ENSG00000153898.12	-1.87823	-0.808679	0.00156807	0.037895	0.15	0.34	0.01	0.12	Down	MCOLN2	chr1	protein_coding	mucolipin 2
ENSG00000149016.15	-1.08384	4.10167	0.00243614	0.049391	6.66	5.93	3.13	3.11	Down	TUT1	chr11	protein_coding	terminal uridylyl transferase 1, U6 snRNA-specific
ENSG00000229388.1	-3.83117	-1.96509	0.00151609	0.0371254	0.23	0.42	0	0.04	Down	RP11-442N24__B.1	chr1	lincRNA
ENSG00000129451.11	-2.56081	-0.708642	6.2403e-05	0.00451464	0.27	0.24	0.07	0.02	Down	KLK10	chr19	protein_coding	kallikrein-related peptidase 10
ENSG00000143502.14	-2.17502	-0.717162	0.000253489	0.011132	0.13	0.3	0.04	0.06	Down	SUSD4	chr1	protein_coding	sushi domain containing 4
ENSG00000240204.2	-2.44411	-1.57766	0.00219032	0.0453051	0.53	0.26	0.15	0	Down	SMKR1	chr7	protein_coding	small lysine-rich protein 1
ENSG00000188996.4	-3.09839	-1.84503	0.000576632	0.0202135	0.35	0.31	0	0.07	Down	HUS1B	chr6	protein_coding	HUS1 checkpoint homolog b (S. pombe)
ENSG00000253426.5	-4.41025	-1.56877	3.59209e-05	0.0030755	0.82	0.33	0	0.04	Down	RP11-10A14.4	chr8	lincRNA
ENSG00000261600.1	-5.67921	-2.24317	0.00109423	0.0289386	0.86	0.09	0	0	Down	RP11-575H3.1	chr2	lincRNA
ENSG00000231196.3	-6.3765	-1.77885	1.59929e-05	0.00165506	0.34	0.9	0	0	Down	RP11-495P10.8	chr1	lincRNA
ENSG00000196420.7	-2.5728	-1.78993	0.00243182	0.0493455	0.46	0.41	0.05	0.09	Down	S100A5	chr1	protein_coding	S100 calcium binding protein A5
ENSG00000184697.6	-2.82647	-0.680352	1.33998e-05	0.00153338	0.55	0.5	0.04	0.1	Down	CLDN6	chr16	protein_coding	claudin 6
ENSG00000260179.1	-6.2102	-1.89706	4.38607e-05	0.00338952	0.29	0.18	0	0	Down	RP5-902P8.12	chr1	lincRNA
ENSG00000265399.1	-5.67949	-2.24304	0.00109423	0.0289386	0.28	0	0	0	Down	RP13-270P17.2	chr18	antisense
ENSG00000240449.1	-6.02166	-2.02558	0.000211004	0.00971433	1.1	0	0	0	Down	RP4-584D14.5	chr7	antisense
ENSG00000115705.20	-5.05823	-1.06518	1.24186e-08	7.98887e-06	0.35	0.05	0	0.01	Down	TPO	chr2	protein_coding	thyroid peroxidase
ENSG00000245067.6	-5.80278	-2.16701	0.000626635	0.0205161	0.39	0	0	0	Down	IGFBP7-AS1	chr4	antisense	IGFBP7 antisense RNA 1
ENSG00000236359.1	-6.02166	-2.02558	0.000211004	0.00971433	0.82	0	0	0	Down	OR51B8P	chr11	unprocessed_pseudogene	olfactory receptor, family 51, subfamily B, member 8 pseudogene
ENSG00000204183.1	-6.21171	-1.89628	7.34591e-05	0.0048704	0.42	0	0	0	Down	GDF5OS	chr20	protein_coding	growth differentiation factor 5 opposite strand
ENSG00000274315.1	-4.66104	-1.38104	6.24892e-06	0.0008801	2.25	0	0	0.07	Down	RP11-996F15.5	chr12	antisense
ENSG00000136068.14	-1.80447	9.7653	3.85665e-07	0.000111821	153.75	98.99	33.37	42.85	Down	FLNB	chr3	protein_coding	filamin B, beta
ENSG00000268230.5	-3.18514	-1.78534	0.00156874	0.037895	0.07	0.15	0.02	0	Down	CTD-2619J13.8	chr19	processed_transcript
ENSG00000128917.6	-3.98196	0.08068	5.88342e-11	9.64206e-08	0.56	0.47	0.01	0.05	Down	DLL4	chr15	protein_coding	delta-like 4 (Drosophila)
ENSG00000141294.9	-2.83303	0.0168877	1.69464e-07	6.01635e-05	0.78	0.83	0.1	0.13	Down	LRRC46	chr17	protein_coding	leucine rich repeat containing 46
ENSG00000167046.4	-2.07252	-0.2686	0.000141832	0.00763776	1.17	0	0.22	0.08	Down	RP11-93B14.6	chr20	antisense
ENSG00000106733.20	-1.27659	1.36293	0.00170667	0.04022	1.53	1.6	0.42	0.93	Down	NMRK1	chr9	protein_coding	nicotinamide riboside kinase 1
ENSG00000228695.9	-3.88552	-1.29951	2.6832e-06	0.000487522	0.57	0.02	0	0.04	Down	CES1P1	chr16	transcribed_unprocessed_pseudogene	carboxylesterase 1 pseudogene 1
ENSG00000229528.1	-2.60207	-1.48457	0.000988446	0.0289386	1.15	0.77	0	0.31	Down	RP5-1066H13.4	chr1	antisense
ENSG00000262904.1	-1.7925	-0.159178	0.000488431	0.0178307	1.62	0.34	0.41	0.18	Down	TMPOP2	chr16	processed_pseudogene	thymopoietin pseudogene 2 (functional)
ENSG00000267782.1	-5.91503	-2.0953	0.000362063	0.0137665	0.76	0.48	0	0	Down	RP11-799D4.3	chr17	antisense
ENSG00000269729.1	-2.28841	-0.634683	0.000109539	0.00666818	0.75	1.34	0.22	0.22	Down	AC006262.4	chr19	lincRNA
ENSG00000281379.2	-6.02166	-2.02558	0.000211004	0.00971433	1	0	0	0	Down	SEPT14P19	chr19	transcribed_unprocessed_pseudogene	septin 14 pseudogene 19
ENSG00000259345.5	-5.67755	-2.24398	0.00109423	0.0289386	0.07	0.12	0	0	Down	RP11-624L4.1	chr15	lincRNA
ENSG00000163357.10	-1.79173	-0.750727	0.00224594	0.046124	0.14	0.45	0.09	0.09	Down	DCST1	chr1	protein_coding	DC-STAMP domain containing 1
ENSG00000168306.12	-2.3159	-1.05069	0.000743842	0.0231128	0.34	0.19	0.03	0.08	Down	ACOX2	chr3	protein_coding	acyl-CoA oxidase 2, branched chain
ENSG00000272695.1	-1.72881	-0.426072	0.00183336	0.0409813	0.63	0.35	0.21	0.09	Down	GAS6-AS2	chr13	lincRNA	GAS6 antisense RNA 2 (head to head)
ENSG00000228606.1	-6.11853	-1.9602	0.000123998	0.00687972	0.81	0.41	0	0	Down	RP11-574F21.2	chr1	antisense
ENSG00000169248.12	-5.54469	-2.32311	0.00192837	0.0409813	0.24	0	0	0	Down	CXCL11	chr4	protein_coding	chemokine (C-X-C motif) ligand 11
ENSG00000251239.1	-6.21095	-1.89667	4.38607e-05	0.00338952	1.15	0.27	0	0	Down	CTB-22K21.2	chr17	antisense
ENSG00000230758.1	-2.73041	-1.39056	0.000450239	0.0165892	2.58	1.48	0.62	0	Down	SNAP23P	chr20	processed_pseudogene	synaptosomal-associated protein, 23kDa pseudogene
ENSG00000169896.16	-2.02032	-0.398947	0.000304296	0.0129568	0.3	0.14	0.06	0.05	Down	ITGAM	chr16	protein_coding	integrin, alpha M (complement component 3 receptor 3 subunit)
ENSG00000268940.5	-1.83573	-0.611167	0.0014697	0.0367004	0.99	0.28	0.37	0	Down	CT45A1	chrX	protein_coding	cancer/testis antigen family 45, member A1
ENSG00000228157.4	-7.68887	-0.714955	6.54014e-11	9.72927e-08	0.69	0.72	0	0	Down	AC007952.5	chr17	processed_transcript
ENSG00000147689.16	-1.09376	7.00795	0.00176968	0.0409813	28.48	27.47	14.02	13.52	Down	FAM83A	chr8	protein_coding	family with sequence similarity 83, member A
ENSG00000229299.2	-4.7149	-1.33899	2.6832e-06	0.000487522	1.46	1.08	0	0.08	Down	RP4-583P15.10	chr20	antisense
ENSG00000139410.14	-1.29884	2.7913	0.000497077	0.018111	6.26	5.08	2.47	2.37	Down	SDSL	chr12	protein_coding	serine dehydratase-like
ENSG00000232524.1	-5.67949	-2.24304	0.00109423	0.0289386	1.11	0	0	0	Down	RP11-332K15.1	chr7	antisense
ENSG00000186198.3	-1.6337	-0.204333	0.00143896	0.036167	0.67	1.7	0.45	0.35	Down	SLC51B	chr15	protein_coding	solute carrier family 51, beta subunit
ENSG00000264070.1	-2.72797	-1.15441	0.000151297	0.00796721	0.47	0.69	0	0.17	Down	DND1P1	chr17	processed_pseudogene	dead end homolog 1 pseudogene 1
ENSG00000225555.1	-2.57586	-1.79029	0.00243182	0.0493455	1.15	0.29	0	0.23	Down	AP000320.6	chr21	antisense
ENSG00000186472.19	-2.30445	0.41869	2.10719e-06	0.000447638	0.11	0.06	0.03	0.01	Down	PCLO	chr7	protein_coding	piccolo presynaptic cytomatrix protein
ENSG00000277855.1	-6.02166	-2.02558	0.000211004	0.00971433	0.77	0	0	0	Down	RP11-154H23.4	chr3	antisense
ENSG00000158423.16	-1.83998	0.375115	0.000108455	0.00665324	0.96	0.29	0.05	0.31	Down	RIBC1	chrX	protein_coding	RIB43A domain with coiled-coils 1
ENSG00000173213.8	-6.5254	-1.66933	6.0008e-06	0.000855275	0	0.4	0	0	Down	TUBB8P12	chr18	protein_coding
ENSG00000128564.6	-1.52034	1.98187	0.000103517	0.00641641	2.4	1.5	0.9	0.53	Down	VGF	chr7	protein_coding	VGF nerve growth factor inducible
ENSG00000178597.5	-5.67921	-2.24317	0.00109423	0.0289386	0.17	0.02	0	0	Down	PSAPL1	chr4	protein_coding	prosaposin-like 1 (gene/pseudogene)
ENSG00000226510.1	-3.43038	-1.62243	0.000429353	0.015943	0.46	0.63	0.1	0	Down	UPK1A-AS1	chr19	antisense	UPK1A antisense RNA 1
ENSG00000123338.12	-6.02166	-2.02558	0.000211004	0.00971433	0.07	0	0	0	Down	NCKAP1L	chr12	protein_coding	NCK-associated protein 1-like
ENSG00000135439.11	-6.66448	-1.56495	2.31323e-06	0.000447638	0.1	0.06	0	0	Down	AGAP2	chr12	protein_coding	ArfGAP with GTPase domain, ankyrin repeat and PH domain 2
ENSG00000262873.1	-6.21171	-1.89628	7.34591e-05	0.0048704	0.83	0	0	0	Down	CTD-2561B21.11	chr17	lincRNA
ENSG00000233230.1	-3.35639	-1.677	0.000140602	0.00762326	0.21	1.04	0	0.11	Down	AC079807.2	chr2	antisense
ENSG00000272836.1	-5.67949	-2.24304	0.00109423	0.0289386	1.04	0	0	0	Down	RP3-402G11.27	chr22	antisense
ENSG00000217716.3	-5.54243	-2.3242	0.00192837	0.0409813	0.18	0.74	0	0	Down	RPS10P3	chr9	processed_pseudogene	ribosomal protein S10 pseudogene 3
ENSG00000253307.1	-6.11598	-1.9615	0.000123998	0.00687972	0	1.72	0	0	Down	RP11-10J21.4	chr8	antisense
ENSG00000258813.2	-5.79952	-2.16861	0.000626635	0.0205161	0	0.55	0	0	Down	RP11-109N23.4	chr14	antisense
ENSG00000260352.1	-5.67755	-2.24398	0.00109423	0.0289386	0.39	0.69	0	0	Down	CTD-2288F12.1	chr16	antisense
ENSG00000125531.6	-1.81909	1.11058	1.67078e-05	0.00171413	1.3	0.65	0.21	0.37	Down	C20orf195	chr20	protein_coding	chromosome 20 open reading frame 195
ENSG00000260719.1	-6.02166	-2.02558	0.000211004	0.00971433	0.38	0	0	0	Down	AC009133.17	chr16	antisense
ENSG00000270123.3	-5.54186	-2.32447	0.00192837	0.0409813	0	3.59	0	0	Down	VTRNA2-1	chr5	vaultRNA	vault RNA 2-1
ENSG00000095587.8	-3.64434	-1.47495	2.30266e-05	0.00220968	0.14	0.01	0.01	0.01	Down	TLL2	chr10	protein_coding	tolloid-like 2
ENSG00000238622.1	-2.24234	-1.27176	0.00164277	0.0390208	3.83	3.53	1.07	0.51	Down	SNORD97	chr11	snoRNA	small nucleolar RNA, C/D box 97
ENSG00000023892.10	-2.28814	-0.770412	0.000149973	0.00793256	0.56	0.14	0.03	0.11	Down	DEF6	chr6	protein_coding	differentially expressed in FDCP 6 homolog (mouse)
ENSG00000091129.19	-5.67949	-2.24304	0.00109423	0.0289386	0.07	0	0	0	Down	NRCAM	chr7	protein_coding	neuronal cell adhesion molecule
ENSG00000196866.2	-1.42672	2.16721	0.000199348	0.00971433	13.6	16.47	5.23	6.5	Down	HIST1H2AD	chr6	protein_coding	histone cluster 1, H2ad
ENSG00000266495.1	-6.52819	-1.66782	6.0008e-06	0.000855275	1.4	0.94	0	0	Down	RP11-17J14.2	chr18	antisense
ENSG00000226363.3	-2.1377	-0.74528	0.000336043	0.0137665	0.73	0.69	0.1	0.23	Down	HAGLROS	chr2	lincRNA	HAGLR opposite strand (non-protein coding)
ENSG00000256628.3	-1.41169	2.15401	0.000232301	0.0103544	1.64	2.63	0.68	1	Down	ZBTB11-AS1	chr3	antisense	ZBTB11 antisense RNA 1
ENSG00000018236.14	-5.80278	-2.16701	0.000626635	0.0205161	0.08	0	0	0	Down	CNTN1	chr12	protein_coding	contactin 1
ENSG00000277602.1	-5.54356	-2.32366	0.00192837	0.0409813	1.12	0.75	0	0	Down	AC005363.11	chr16	lincRNA
ENSG00000233179.1	-5.80278	-2.16701	0.000626635	0.0205161	0.96	0	0	0	Down	RP11-536P6.3	chr22	lincRNA
ENSG00000057704.10	-1.35145	1.02615	0.00147475	0.036756	0.63	0.23	0.21	0.15	Down	TMCC3	chr12	protein_coding	transmembrane and coiled-coil domain family 3
ENSG00000276564.1	-5.54469	-2.32311	0.00192837	0.0409813	0.19	0	0	0	Down	CTA-276F8.1	chr16	lincRNA
ENSG00000206633.1	-6.52912	-1.66732	6.0008e-06	0.000855275	5.33	1.34	0	0	Down	SNORA80B	chr2	snoRNA	small nucleolar RNA, H/ACA box 80B
ENSG00000067221.13	-1.1178	3.22795	0.00219137	0.0453051	1.6	1.96	0.87	0.85	Down	STOML1	chr15	protein_coding	stomatin (EPB72)-like 1
ENSG00000167799.9	-1.26713	2.17517	0.000900064	0.0270497	7.95	6.26	2.68	3.52	Down	NUDT8	chr11	protein_coding	nudix (nucleoside diphosphate linked moiety X)-type motif 8
ENSG00000280180.1	-6.21045	-1.89693	4.38607e-05	0.00338952	0.09	0.04	0	0	Down	RP11-244B22.10	chr16	TEC
ENSG00000214407.3	-5.67644	-2.24452	0.00109423	0.0289386	0	0.24	0	0	Down	RP11-221J22.1	chr3	lincRNA
ENSG00000219992.2	-6.66628	-1.56396	2.31323e-06	0.000447638	2.29	0	0	0	Down	RP11-420L9.2	chr6	processed_pseudogene
ENSG00000258512.1	-2.83296	-1.62675	0.000659045	0.0210888	0.85	0.43	0.06	0.11	Down	LINC00239	chr14	lincRNA	long intergenic non-protein coding RNA 239
ENSG00000256268.1	-2.14532	-0.313907	9.47548e-05	0.00596654	1.01	1.48	0.21	0.37	Down	RP11-221N13.3	chr12	lincRNA
ENSG00000177464.4	-4.26581	-1.67248	8.87579e-05	0.00560375	0.1	0.18	0	0.01	Down	GPR4	chr19	protein_coding	G protein-coupled receptor 4
ENSG00000160226.15	-1.25824	1.93899	0.0011619	0.0302909	1.89	1.86	0.65	1	Down	C21orf2	chr21	protein_coding	chromosome 21 open reading frame 2
ENSG00000196979.1	-1.88895	-0.696871	0.00133509	0.0340233	0.35	0.14	0	0.13	Down	RP11-88G17.6	chr9	lincRNA
ENSG00000137561.4	-2.74463	-1.67886	0.00101512	0.0289386	0	0.33	0.05	0	Down	TTPA	chr8	protein_coding	tocopherol (alpha) transfer protein
ENSG00000100985.7	-1.20871	1.49648	0.00248344	0.0497566	1.24	1.78	0.57	0.8	Down	MMP9	chr20	protein_coding	matrix metallopeptidase 9
ENSG00000272579.1	-1.82911	-0.720771	0.00173136	0.0405608	0.39	1.85	0.5	0.16	Down	RP11-101E13.5	chr1	antisense
ENSG00000204577.11	-5.67644	-2.24452	0.00109423	0.0289386	0	0.17	0	0	Down	LILRB3	chr19	protein_coding	leukocyte immunoglobulin-like receptor, subfamily B (with TM and ITIM domains), member 3
ENSG00000248932.5	-2.30377	-1.22966	0.00164277	0.0390208	0.71	0	0.12	0.02	Down	RP11-319G6.1	chr3	antisense
ENSG00000120555.13	-4.53862	-1.47335	1.4835e-05	0.00165506	0.34	0.53	0	0.03	Down	SEPT7P9	chr10	transcribed_unprocessed_pseudogene	septin 7 pseudogene 9
ENSG00000123329.17	-2.67205	-1.43835	0.000666279	0.0210888	0.17	0.09	0	0.04	Down	ARHGAP9	chr12	protein_coding	Rho GTPase activating protein 9
ENSG00000135373.12	-6.11853	-1.9602	0.000123998	0.00687972	0.11	0.06	0	0	Down	EHF	chr11	protein_coding	ets homologous factor
ENSG00000242396.1	-2.56921	-0.306725	4.85161e-06	0.00079057	1.1	3.01	0.26	0.44	Down	RP11-67L3.5	chr1	antisense
ENSG00000214432.9	-2.0826	-0.355945	0.000190407	0.00971433	0.28	0.35	0.08	0.07	Down	AC068831.10	chr15	antisense
ENSG00000175600.15	-1.58474	0.766208	0.000369742	0.013925	1.79	0.82	0.57	0.34	Down	SUGCT	chr7	protein_coding	succinyl-CoA:glutarate-CoA transferase
ENSG00000170745.11	-1.61058	-0.0922093	0.00159508	0.0384296	0.59	0.36	0.21	0.12	Down	KCNS3	chr2	protein_coding	potassium voltage-gated channel, modifier subfamily S, member 3
ENSG00000196092.12	-2.28789	-0.772209	0.000149973	0.00793256	0.09	0.1	0	0.03	Down	PAX5	chr9	protein_coding	paired box 5
ENSG00000205976.4	-5.54186	-2.32447	0.00192837	0.0409813	0	0.18	0	0	Down	RP11-404K5.2	chr5	unprocessed_pseudogene
ENSG00000233058.1	-2.05696	-0.12056	7.01973e-05	0.0048704	0.25	0.7	0.13	0.11	Down	LINC00884	chr3	antisense	long intergenic non-protein coding RNA 884
ENSG00000183918.14	-5.67949	-2.24304	0.00109423	0.0289386	0.2	0	0	0	Down	SH2D1A	chrX	protein_coding	SH2 domain containing 1A
ENSG00000231160.9	-3.35709	-0.9391	2.52101e-06	0.000476232	0.28	0.22	0.02	0.02	Down	KLF3-AS1	chr4	processed_transcript	KLF3 antisense RNA 1
ENSG00000233639.5	-3.05522	-1.48035	0.000184205	0.00949015	0.91	0.37	0	0.15	Down	LINC01158	chr2	processed_transcript	long intergenic non-protein coding RNA 1158
ENSG00000163017.13	-2.04074	-0.691675	0.000529337	0.019177	0.24	0.38	0.07	0.08	Down	ACTG2	chr2	protein_coding	actin, gamma 2, smooth muscle, enteric
ENSG00000254143.1	-3.72662	-2.03079	0.00247689	0.0496672	0.6	0.52	0	0.07	Down	RP11-470M17.2	chr8	lincRNA
ENSG00000272375.1	-6.02166	-2.02558	0.000211004	0.00971433	0.98	0	0	0	Down	RP11-51J9.6	chr8	lincRNA
ENSG00000253736.1	-3.61426	-1.07199	2.29353e-06	0.000447638	3.99	0	0	0.31	Down	RP11-779O18.3	chr5	antisense
ENSG00000260132.1	-6.29811	-1.83557	2.63878e-05	0.00237012	2.03	0	0	0	Down	LA16c-312E8.2	chr16	antisense
ENSG00000258982.1	-2.0567	-0.918863	0.00185838	0.0409813	3.42	0.69	0.92	0.11	Down	RP11-638I2.4	chr14	antisense
ENSG00000140368.12	-3.77027	-1.38543	9.6048e-06	0.00121658	0.47	0.09	0	0.04	Down	PSTPIP1	chr15	protein_coding	proline-serine-threonine phosphatase interacting protein 1
ENSG00000271941.1	-5.54186	-2.32447	0.00192837	0.0409813	0	0.63	0	0	Down	RP11-188P20.3	chr3	antisense
ENSG00000244791.2	-6.01984	-2.0265	0.000211004	0.00971433	0.22	0.22	0	0	Down	RP11-65D17.1	chr8	lincRNA
ENSG00000256576.2	-1.71862	0.786399	0.000109217	0.00666818	1.74	1.41	0.44	0.57	Down	RP13-977J11.2	chr12	lincRNA
ENSG00000274874.1	-3.82987	-1.96575	0.00151609	0.0371254	0	1.27	0	0.07	Down	RP11-214K3.25	chr12	protein_coding
ENSG00000261653.1	-4.0174	-1.84103	0.000576632	0.0202135	0	0.65	0.03	0	Down	RP11-21L1.1	chr16	lincRNA
ENSG00000169551.12	-5.67838	-2.24358	0.00109423	0.0289386	0.18	0.11	0	0	Down	CT55	chrX	protein_coding	cancer/testis antigen 55
ENSG00000158125.9	-1.41325	0.42851	0.00200416	0.0421032	0.41	0.18	0.11	0.13	Down	XDH	chr2	protein_coding	xanthine dehydrogenase
ENSG00000188004.9	-1.4413	0.89811	0.00074479	0.0231128	1.21	0.71	0.32	0.42	Down	C1orf204	chr1	protein_coding	chromosome 1 open reading frame 204
ENSG00000227811.2	-2.75271	-1.6804	0.00101512	0.0289386	0.17	0.19	0	0.05	Down	FAM212B-AS1	chr1	antisense	FAM212B antisense RNA 1
ENSG00000260996.1	-6.21171	-1.89628	7.34591e-05	0.0048704	0.39	0	0	0	Down	RP13-122B23.8	chr9	sense_overlapping
ENSG00000246331.2	-5.54469	-2.32311	0.00192837	0.0409813	0.29	0	0	0	Down	RP11-77I22.2	chr12	lincRNA
ENSG00000173926.5	-1.20193	1.78726	0.00228675	0.0467605	0.95	0.98	0.37	0.51	Down	2019-03-03	chr5	protein_coding	membrane-associated ring finger (C3HC4) 3, E3 ubiquitin protein ligase
ENSG00000108551.4	-1.85669	-0.252877	0.000544805	0.0195285	0.67	0.6	0.35	0.02	Down	RASD1	chr17	protein_coding	RAS, dexamethasone-induced 1
ENSG00000260367.2	-5.91503	-2.0953	0.000362063	0.0137665	0.25	0.15	0	0	Down	RP11-264B17.4	chr16	antisense
ENSG00000155849.15	-5.91636	-2.09463	0.000362063	0.0137665	0.11	0	0	0	Down	ELMO1	chr7	protein_coding	engulfment and cell motility 1
ENSG00000183317.16	-5.54186	-2.32447	0.00192837	0.0409813	0	0.07	0	0	Down	EPHA10	chr1	protein_coding	EPH receptor A10
ENSG00000169026.12	-3.35759	-1.67638	0.000140602	0.00762326	0.17	0.21	0	0.03	Down	MFSD7	chr4	protein_coding	major facilitator superfamily domain containing 7
ENSG00000174059.16	-2.85669	-1.30397	0.000207246	0.00971433	0.12	0	0.02	0	Down	CD34	chr1	protein_coding	CD34 molecule
ENSG00000265967.1	-3.09732	-1.84364	0.00243182	0.0493455	0.98	0.25	0.07	0.07	Down	AC100830.4	chr15	antisense
ENSG00000230224.1	-5.67949	-2.24304	0.00109423	0.0289386	0.6	0	0	0	Down	PHBP9	chr10	processed_pseudogene	prohibitin pseudogene 9
ENSG00000065621.14	-1.71175	0.440013	0.000225309	0.0100805	0.31	0.21	0.11	0.06	Down	GSTO2	chr10	protein_coding	glutathione S-transferase omega 2
ENSG00000259378.1	-3.72476	-2.03171	0.00247689	0.0496672	0	0.44	0	0.03	Down	DCAF13P3	chr15	processed_pseudogene	DDB1 and CUL4 associated factor 13 pseudogene 3
ENSG00000175262.14	-6.29688	-1.83621	2.63878e-05	0.00237012	0.2	0.08	0	0	Down	C1orf127	chr1	protein_coding	chromosome 1 open reading frame 127
ENSG00000231933.7	-5.67949	-2.24304	0.00109423	0.0289386	0.11	0	0	0	Down	CTA-125H2.2	chr22	antisense
ENSG00000251417.2	-2.61742	-1.23164	0.000309019	0.0129952	0.18	0.39	0	0.09	Down	RP11-1348G14.4	chr16	lincRNA
ENSG00000129450.8	-4.19148	-1.7252	0.000140602	0.00762326	0.34	0	0	0.02	Down	SIGLEC9	chr19	protein_coding	sialic acid binding Ig-like lectin 9
ENSG00000275395.4	-1.71969	1.5234	2.56358e-05	0.00237012	0.42	0.2	0.07	0.13	Down	FCGBP	chr19	protein_coding	Fc fragment of IgG binding protein
ENSG00000106125.14	-2.83331	-1.62845	0.000659045	0.0210888	0.08	0.22	0	0.04	Down	FAM188B	chr7	protein_coding	family with sequence similarity 188, member B
ENSG00000185860.13	-2.43813	-1.35317	0.00132137	0.0337461	0.29	0	0	0.05	Down	C1orf110	chr1	protein_coding	chromosome 1 open reading frame 110
ENSG00000185338.4	-3.18589	-1.78496	0.00156874	0.037895	0.3	0.3	0.06	0	Down	SOCS1	chr16	protein_coding	suppressor of cytokine signaling 1
ENSG00000264668.1	-1.25365	1.3597	0.00217385	0.0451895	0.91	1.32	0.53	0.45	Down	RP13-582O9.6	chr8	protein_coding
ENSG00000267493.3	-1.54346	0.789925	0.000437002	0.0162018	3.1	1.47	0.61	1.03	Down	CIRBP-AS1	chr19	antisense	CIRBP antisense RNA 1
ENSG00000101353.14	-6.11827	-1.96033	0.000123998	0.00687972	0.12	0.08	0	0	Down	MROH8	chr20	protein_coding	maestro heat-like repeat family member 8
ENSG00000185527.11	-2.02572	-0.583862	0.000474369	0.0173707	0.74	0.37	0.26	0.02	Down	PDE6G	chr17	protein_coding	phosphodiesterase 6G, cGMP-specific, rod, gamma
ENSG00000183773.15	-1.44197	0.525254	0.00141324	0.0355957	0.79	0.67	0.3	0.26	Down	AIFM3	chr22	protein_coding	apoptosis-inducing factor, mitochondrion-associated, 3
ENSG00000162267.12	-5.54469	-2.32311	0.00192837	0.0409813	0.15	0	0	0	Down	ITIH3	chr3	protein_coding	inter-alpha-trypsin inhibitor heavy chain 3
ENSG00000234975.6	-2.02302	-0.400374	0.000304296	0.0129568	3.08	1.88	0.55	0.71	Down	FTH1P2	chr1	processed_pseudogene	ferritin, heavy polypeptide 1 pseudogene 2
ENSG00000233799.1	-3.35791	-1.67428	0.000140602	0.00762326	2.85	0	0.13	0.13	Down	AC139887.4	chr4	antisense
ENSG00000259062.2	-3.35567	-1.67738	0.000140602	0.00762326	0	0.88	0	0.08	Down	ACTN1-AS1	chr14	antisense	ACTN1 antisense RNA 1
ENSG00000214050.7	-1.64779	-0.410878	0.00183336	0.0409813	0.2	1	0.14	0.25	Down	FBXO16	chr8	protein_coding	F-box protein 16
ENSG00000064692.18	-5.54469	-2.32311	0.00192837	0.0409813	0.09	0	0	0	Down	SNCAIP	chr5	protein_coding	synuclein, alpha interacting protein
ENSG00000088727.12	-1.23924	2.25368	0.00118541	0.0308011	1.19	1.57	0.64	0.58	Down	KIF9	chr3	protein_coding	kinesin family member 9
ENSG00000256188.2	-6.02166	-2.02558	0.000211004	0.00971433	0.35	0	0	0	Down	TAS2R30	chr12	protein_coding	taste receptor, type 2, member 30
ENSG00000226981.2	-6.11751	-1.96072	0.000123998	0.00687972	0.26	0.39	0	0	Down	ABHD17AP6	chr17	unprocessed_pseudogene	abhydrolase domain containing 17A pseudogene 6
ENSG00000226754.1	-2.36425	-0.712163	8.34676e-05	0.00535497	1.11	0.31	0.13	0.15	Down	RP5-1024G6.5	chr1	antisense
ENSG00000261055.1	-3.64531	-1.47637	2.30266e-05	0.00220968	0.38	0.14	0	0.04	Down	RP11-195M16.3	chr1	lincRNA
ENSG00000125510.15	-6.37963	-1.7772	1.59929e-05	0.00165506	0.23	0	0	0	Down	OPRL1	chr20	protein_coding	opiate receptor-like 1
ENSG00000172969.7	-5.67949	-2.24304	0.00109423	0.0289386	0.24	0	0	0	Down	FRG2C	chr3	protein_coding	FSHD region gene 2 family, member C
ENSG00000272202.1	-3.55408	-0.783988	4.55526e-07	0.000127558	0.9	0.63	0.07	0.06	Down	RP11-157F20.3	chr3	antisense
ENSG00000197406.7	-1.42214	0.268799	0.00210177	0.0438828	0.43	1.02	0.16	0.4	Down	DIO3	chr14	protein_coding	deiodinase, iodothyronine, type III
ENSG00000211891.5	-1.48297	0.610752	0.000766663	0.0236681	1.25	1.55	0.24	0.8	Down	IGHE	chr14	IG_C_gene	immunoglobulin heavy constant epsilon
ENSG00000161270.19	-3.05613	-1.47987	0.000184205	0.00949015	0.2	0.02	0	0.03	Down	NPHS1	chr19	protein_coding	nephrosis 1, congenital, Finnish type (nephrin)
ENSG00000233623.2	-5.80278	-2.16701	0.000626635	0.0205161	0.8	0	0	0	Down	PGAM1P11	chr1	processed_pseudogene	phosphoglycerate mutase 1 pseudogene 11
ENSG00000265148.5	-6.21171	-1.89628	7.34591e-05	0.0048704	0.27	0	0	0	Down	BZRAP1-AS1	chr17	antisense	BZRAP1 antisense RNA 1
ENSG00000168589.14	-3.19158	-1.78593	0.000358374	0.0137665	0.86	0.12	0	0.1	Down	DYNLRB2	chr16	protein_coding	dynein, light chain, roadblock-type 2
ENSG00000219986.2	-3.5102	-1.57223	5.63203e-05	0.00420231	1.76	0.09	0	0.15	Down	BTF3P7	chr6	processed_pseudogene	basic transcription factor 3 pseudogene 7
ENSG00000263257.1	-2.05752	-0.46628	0.000261141	0.0113632	1.64	1.73	0.52	0.31	Down	RP11-65J21.4	chr16	lincRNA
ENSG00000226445.1	-6.11598	-1.9615	0.000123998	0.00687972	0	0.7	0	0	Down	XXyac-YX65C7_A.2	chr6	antisense
ENSG00000175536.6	-1.46585	1.00424	0.000541778	0.019504	2.45	2.69	1.16	0.79	Down	LIPT2	chr11	protein_coding	lipoyl(octanoyl) transferase 2 (putative)
ENSG00000167807.15	-1.17845	3.46745	0.00117838	0.0306868	6.6	7.65	3.23	3.38	Down	CTD-2369P2.10	chr19	protein_coding
ENSG00000158525.15	-6.11853	-1.9602	0.000123998	0.00687972	0.17	0.09	0	0	Down	CPA5	chr7	protein_coding	carboxypeptidase A5
ENSG00000168907.13	-5.54186	-2.32447	0.00192837	0.0409813	0	0.08	0	0	Down	PLA2G4F	chr15	protein_coding	phospholipase A2, group IVF
ENSG00000266821.1	-3.83169	-1.96483	0.00151609	0.0371254	0.11	0.11	0	0.01	Down	RP11-6N17.2	chr17	lincRNA
ENSG00000225431.1	-2.67228	-1.43823	0.000666279	0.0210888	0.38	0.15	0	0.08	Down	AP001626.1	chr21	lincRNA
ENSG00000204624.7	-2.61374	-1.22822	0.000309019	0.0129952	0.15	0.06	0.02	0.01	Down	PTCHD2	chr1	protein_coding	patched domain containing 2
ENSG00000180998.11	-1.65187	-0.127594	0.00125375	0.0321918	0.41	0.2	0.12	0.08	Down	GPR137C	chr14	protein_coding	G protein-coupled receptor 137C
ENSG00000100368.13	-2.49884	-1.31241	0.000916329	0.0273314	0.09	0.12	0	0.04	Down	CSF2RB	chr22	protein_coding	colony stimulating factor 2 receptor, beta, low-affinity (granulocyte-macrophage)
ENSG00000173080.5	-3.05339	-1.48132	0.000184205	0.00949015	0.26	0.51	0	0.09	Down	RXFP4	chr1	protein_coding	relaxin/insulin-like family peptide receptor 4
ENSG00000228395.1	-1.7903	-0.472596	0.00136734	0.0346966	0.8	0.7	0.21	0.24	Down	RP11-216B9.6	chr9	antisense
ENSG00000200795.1	-2.729	-1.15385	0.000151297	0.00796721	5.14	3.56	0	1.29	Down	RNU4-1	chr12	snRNA	RNA, U4 small nuclear 1
ENSG00000185250.15	-2.61785	-1.23141	0.000309019	0.0129952	0.11	0.16	0	0.04	Down	PPIL6	chr6	protein_coding	peptidylprolyl isomerase (cyclophilin)-like 6
ENSG00000224358.1	-2.31508	-1.05114	0.000743842	0.0231128	0.3	0.3	0.04	0.08	Down	RP11-466F5.8	chr1	antisense
ENSG00000124678.17	-2.66552	-1.73509	0.00156874	0.037895	0.07	0.2	0	0.04	Down	TCP11	chr6	protein_coding	t-complex 11, testis-specific
ENSG00000173805.15	-1.87397	1.84671	2.65292e-06	0.000487522	1.05	0.66	0.28	0.22	Down	HAP1	chr17	protein_coding	huntingtin-associated protein 1
ENSG00000197457.9	-1.19278	2.25782	0.00172664	0.0405608	2.48	2.42	1.07	1.18	Down	STMN3	chr20	protein_coding	stathmin-like 3
ENSG00000260366.1	-5.79952	-2.16861	0.000626635	0.0205161	0	2	0	0	Down	CTD-2639E6.4	chr19	sense_overlapping
ENSG00000242114.5	-1.30246	1.03916	0.00222092	0.0457297	2.23	1.47	0.87	0.7	Down	MTFP1	chr22	protein_coding	mitochondrial fission process 1
ENSG00000275880.1	-1.80302	-0.383696	0.00118044	0.030707	0.37	0.24	0.07	0.11	Down	RP11-90L1.8	chr13	antisense
ENSG00000267764.1	-6.02062	-2.0261	0.000211004	0.00971433	0.52	0.21	0	0	Down	RP11-484L8.1	chr18	antisense
ENSG00000151117.8	-2.09773	-0.444701	0.000204542	0.00971433	0.33	0.23	0.04	0.09	Down	TMEM86A	chr11	protein_coding	transmembrane protein 86A
ENSG00000160111.12	-1.85376	-0.201688	0.000357595	0.0137665	0.24	0.14	0.02	0.09	Down	CPAMD8	chr19	protein_coding	C3 and PZP-like, alpha-2-macroglobulin domain containing 8
ENSG00000163734.4	-3.00631	-0.732398	6.20738e-06	0.000879453	1.35	0.3	0.04	0.17	Down	CXCL3	chr4	protein_coding	chemokine (C-X-C motif) ligand 3
ENSG00000278982.1	-1.79562	-0.240784	0.000544805	0.0195285	0.87	0.32	0.08	0.27	Down	RP5-1031D4.3	chr10	TEC
ENSG00000169429.10	-1.27757	2.74091	0.000594496	0.0205161	4.03	4.53	2.28	1.42	Down	CXCL8	chr4	protein_coding	chemokine (C-X-C motif) ligand 8
ENSG00000204866.8	-6.01984	-2.0265	0.000211004	0.00971433	0.33	0.34	0	0	Down	IGFL2	chr19	protein_coding	IGF-like family member 2
ENSG00000267409.1	-5.54186	-2.32447	0.00192837	0.0409813	0	0.78	0	0	Down	RP11-567M16.2	chr18	lincRNA
ENSG00000225746.8	-5.54214	-2.32434	0.00192837	0.0409813	0.02	0.17	0	0	Down	SNHG23	chr14	lincRNA	small nucleolar RNA host gene 23
ENSG00000136856.17	-1.15032	3.2743	0.00161996	0.038791	6.58	4.53	2.36	2.9	Down	SLC2A8	chr9	protein_coding	solute carrier family 2 (facilitated glucose transporter), member 8
ENSG00000233080.2	-1.76666	-0.408126	0.00147098	0.0367004	0.42	2.6	0.35	0.56	Down	LINC01399	chr22	lincRNA	long intergenic non-protein coding RNA 1399
ENSG00000080573.6	-1.39832	0.551894	0.00165094	0.0391002	0.23	0.37	0.05	0.19	Down	COL5A3	chr19	protein_coding	collagen, type V, alpha 3
ENSG00000204610.12	-6.37915	-1.77745	1.59929e-05	0.00165506	0.32	0.04	0	0	Down	TRIM15	chr6	protein_coding	tripartite motif containing 15
ENSG00000140470.13	-5.67949	-2.24304	0.00109423	0.0289386	0.08	0	0	0	Down	ADAMTS17	chr15	protein_coding	ADAM metallopeptidase with thrombospondin type 1 motif, 17
ENSG00000168539.3	-6.95859	-1.33429	1.53629e-07	5.62565e-05	0.35	0.06	0	0	Down	CHRM1	chr11	protein_coding	cholinergic receptor, muscarinic 1
ENSG00000069667.15	-1.62552	0.179106	0.000693363	0.0218141	0.24	0.02	0.03	0.06	Down	RORA	chr15	protein_coding	RAR-related orphan receptor A
ENSG00000129355.6	-1.21445	2.63799	0.00114615	0.0300218	6.03	4.43	1.85	2.89	Down	CDKN2D	chr19	protein_coding	cyclin-dependent kinase inhibitor 2D (p19, inhibits CDK4)
ENSG00000277837.1	-1.71765	-0.227048	0.001105	0.0291266	0.05	0.39	0.02	0.12	Down	RP11-714M23.2	chr18	lincRNA
ENSG00000189051.5	-6.53005	-1.66682	6.0008e-06	0.000855275	0.3	0	0	0	Down	RNF222	chr17	protein_coding	ring finger protein 222
ENSG00000116701.14	-1.42509	2.47665	0.000167559	0.00872702	2.44	3.56	0.78	1.57	Down	NCF2	chr1	protein_coding	neutrophil cytosolic factor 2
ENSG00000164089.8	-3.30409	-1.30428	2.3712e-05	0.00224858	0.34	0.19	0	0.05	Down	ETNPPL	chr4	protein_coding	ethanolamine-phosphate phospho-lyase
ENSG00000103034.14	-2.85415	-0.342797	7.36661e-07	0.000192681	0.36	0.16	0.03	0.05	Down	NDRG4	chr16	protein_coding	NDRG family member 4
ENSG00000189068.9	-2.00477	-0.832543	0.000787483	0.0241854	0.47	0.9	0.18	0.17	Down	VSTM1	chr19	protein_coding	V-set and transmembrane domain containing 1
ENSG00000264920.1	-1.96165	-0.640464	0.000794915	0.024353	2.19	1.19	0.31	0.59	Down	RP11-6N17.4	chr17	processed_transcript
ENSG00000235781.1	-5.67838	-2.24358	0.00109423	0.0289386	0.37	0.21	0	0	Down	XXbac-BPG249D20.9	chr6	antisense
ENSG00000278463.1	-2.02111	-0.399988	0.000304296	0.0129568	3	2.2	0.68	0.65	Down	HIST1H2AB	chr6	protein_coding	histone cluster 1, H2ab
ENSG00000244040.5	-5.54328	-2.32379	0.00192837	0.0409813	0.07	0.07	0	0	Down	IL12A-AS1	chr3	antisense	IL12A antisense RNA 1
ENSG00000259788.1	-5.54186	-2.32447	0.00192837	0.0409813	0	0.42	0	0	Down	RP11-359K18.3	chr1	antisense
ENSG00000235831.6	-1.53747	0.0215583	0.00214096	0.0446227	0.48	0.62	0.18	0.22	Down	BHLHE40-AS1	chr3	antisense	BHLHE40 antisense RNA 1
ENSG00000270765.5	-2.22015	-0.947818	0.000896986	0.0269912	0.38	0.08	0.1	0	Down	GAS2L2	chr17	protein_coding	growth arrest-specific 2 like 2
ENSG00000200959.1	-2.80065	-1.35096	0.00030505	0.0129657	2.06	3.22	0	0.74	Down	SNORA74A	chr5	snoRNA	small nucleolar RNA, H/ACA box 74A
ENSG00000188985.6	-2.5219	-1.08069	0.000301334	0.0128999	1.22	1.06	0.34	0.07	Down	DHFRP1	chr18	processed_pseudogene	dihydrofolate reductase pseudogene 1
ENSG00000102760.12	-2.01338	-0.953392	0.00247683	0.0496672	1.13	0.24	0.2	0.15	Down	RGCC	chr13	protein_coding	regulator of cell cycle
ENSG00000270882.2	-4.47499	-1.52078	2.30266e-05	0.00220968	0.62	1.09	0	0.06	Down	HIST2H4A	chr1	protein_coding	histone cluster 2, H4a
ENSG00000167850.3	-2.46885	0.20249	1.54567e-06	0.000343832	0.87	1.38	0.38	0.05	Down	CD300C	chr17	protein_coding	CD300c molecule
ENSG00000272129.1	-6.02166	-2.02558	0.000211004	0.00971433	0.44	0	0	0	Down	RP11-250B2.6	chr6	lincRNA
ENSG00000201321.1	-5.54469	-2.32311	0.00192837	0.0409813	3.81	0	0	0	Down	RNA5S9	chr1	rRNA	RNA, 5S ribosomal 9
ENSG00000172663.8	-1.13289	2.75215	0.00222237	0.0457297	2.88	1.82	1.37	0.88	Down	TMEM134	chr11	protein_coding	transmembrane protein 134
ENSG00000269086.2	-6.11981	-1.95955	0.000123998	0.00687972	0.1	0	0	0	Down	CTC-523E23.5	chr19	lincRNA
ENSG00000161681.15	-6.59657	-1.61625	3.71355e-06	0.000640506	0.05	0.09	0	0	Down	SHANK1	chr19	protein_coding	SH3 and multiple ankyrin repeat domains 1
ENSG00000255367.1	-5.54328	-2.32379	0.00192837	0.0409813	0.16	0.17	0	0	Down	RP13-726E6.2	chr11	lincRNA
ENSG00000226965.1	-7.15318	-1.17454	2.81513e-08	1.42565e-05	0.82	2.03	0	0	Down	AC003088.1	chr7	lincRNA
ENSG00000106006.6	-1.79543	-0.472625	0.00136734	0.0346966	1.56	0.32	0.19	0.37	Down	HOXA6	chr7	protein_coding	homeobox A6
ENSG00000253824.1	-2.66699	-1.19081	0.000215986	0.00981087	0.35	1.49	0.18	0.11	Down	KB-173C10.2	chr8	lincRNA
ENSG00000099984.10	-3.18908	-1.7872	0.000358374	0.0137665	0.16	0.49	0	0.07	Down	GSTT2	chr22	polymorphic_pseudogene	glutathione S-transferase theta 2 (gene/pseudogene)
ENSG00000272906.1	-3.27652	-1.7304	0.000223889	0.0100358	0.41	0.37	0	0.07	Down	RP11-533E19.7	chr1	lincRNA
ENSG00000188760.10	-1.42379	0.73354	0.00115511	0.0301714	0.65	1.01	0.18	0.47	Down	TMEM198	chr2	protein_coding	transmembrane protein 198
ENSG00000229292.1	-6.21171	-1.89628	7.34591e-05	0.0048704	0.8	0	0	0	Down	RFPL4AL1	chr19	protein_coding	ret finger protein-like 4A-like 1
ENSG00000270141.3	-2.47194	-0.169914	5.84113e-06	0.000855275	2.26	2.53	0.14	0.74	Down	TERC	chr3	lincRNA	telomerase RNA component
ENSG00000149582.15	-2.36533	-1.19425	0.000830003	0.0251665	0.14	0.13	0.02	0.04	Down	TMEM25	chr11	protein_coding	transmembrane protein 25
ENSG00000237595.3	-2.09603	0.3563	1.01014e-05	0.00125226	2.64	0.77	0.11	0.72	Down	RP11-112L6.3	chr20	lincRNA
ENSG00000163121.9	-2.20678	0.133869	1.12157e-05	0.00135277	1.04	0.49	0.13	0.21	Down	NEURL3	chr2	protein_coding	neuralized E3 ubiquitin protein ligase 3
ENSG00000135436.8	-2.53028	-1.08314	0.000301334	0.0128999	0.2	0.09	0.01	0.04	Down	FAM186B	chr12	protein_coding	family with sequence similarity 186, member B
ENSG00000161594.6	-6.11751	-1.96072	0.000123998	0.00687972	0.13	0.2	0	0	Down	KLHL10	chr17	protein_coding	kelch-like family member 10
ENSG00000225163.3	-5.91477	-2.09543	0.000362063	0.0137665	0.71	0.61	0	0	Down	LINC00618	chr14	lincRNA	long intergenic non-protein coding RNA 618
ENSG00000274021.1	-4.10781	-1.78057	0.000223889	0.0100358	0.34	0	0.02	0	Down	RP11-823E8.3	chr12	lincRNA
ENSG00000268996.3	-1.65733	1.04861	9.73367e-05	0.00608133	1.6	1.39	0.37	0.62	Down	MAN1B1-AS1	chr9	antisense	MAN1B1 antisense RNA 1 (head to head)
ENSG00000116039.11	-3.92962	-1.90165	0.000576632	0.0202135	0.17	0.19	0	0.02	Down	ATP6V1B1	chr2	protein_coding	ATPase, H+ transporting, lysosomal 56/58kDa, V1 subunit B1
ENSG00000128815.17	-6.11802	-1.96046	0.000123998	0.00687972	0.04	0.03	0	0	Down	WDFY4	chr10	protein_coding	WDFY family member 4
ENSG00000237693.4	-6.2102	-1.89706	4.38607e-05	0.00338952	0.27	0.16	0	0	Down	IRGM	chr5	protein_coding	immunity-related GTPase family, M
ENSG00000167772.11	-1.16158	7.06699	0.000913495	0.0273314	101.66	77.96	44.76	39.66	Down	ANGPTL4	chr19	protein_coding	angiopoietin-like 4
